# Supplementary material for: A protocol for hydrogenation of aldehydes and ketones to alcohols in aqueous media at room temperature in high yields and purity
Source: Royal Society of Chemistry journal article supplement (doi:10.1039/d4ob00798k), 2024-01-01

## Supporting Information

### A Protocol for Hydrogenation of Aldehydes and Ketones to Alcohols in Aqueous Media at Room Temperature in High Yields and Purity

Xiao-Ge Wang,<sup>a</sup> Monday Peter Ajisafe,<sup>a</sup> Eman Fayad,<sup>b</sup> Hanadi A. Katouah,<sup>c</sup> and Hua-Li Qin<sup>\*a</sup>

<sup>a</sup> School of Chemistry, Chemical Engineering and Life Sciences, Wuhan University of Technology, Wuhan 430070, China

<sup>b</sup> Department of Biotechnology, College of Sciences, Taif University, P.O. Box 11099, Taif 21944, Saudi Arabia

<sup>c</sup> Chemistry Department, College of Science, Umm Al-Qura University, 21955, Makkah, Saudi Arabia

\*Corresponding author: Hua-Li Qin

*E-mail:* qinhuali@whut.edu.cn

### Table of Contents

|                                                  |     |
|--------------------------------------------------|-----|
| 1. General Information .....                     | S2  |
| 2. Optimization of the Reaction Conditions ..... | S3  |
| 3. Experimental Procedures .....                 | S11 |
| 4. Characterization .....                        | S14 |
| 5. References .....                              | S26 |
| 6. NMR Spectra .....                             | S28 |

## 1. General Information

All reactions were carried out in dried stainless-steel high pressure reactors, which were purchased from Anhui Kemi Instrument Co.,LTD., with built-in magnetic stirring or mechanical stirring paddle, and total volume of 20 ml (Six parallel reactors, dimensions 260 x 260 x 900 mm, wall-thickness of 100 mm), 50 ml (dimensions 550 x 550 x 700 mm, wall-thickness of 250 mm) or 100 ml (dimensions 550 x 550 x 850 mm, wall-thickness of 150 mm). A 50  $\mu$ m Raney nickel catalyst was used in this study. All reagents were purchased from commercial sources and used without further purification. Unless otherwise specified, Nuclear magnetic resonance (NMR) spectra were recorded in  $\text{CDCl}_3$  or  $\text{DMSO-}d_6$  on a 500 MHz (for  $^1\text{H}$ ) spectrometers. All chemical shifts were reported in ppm relative to tetramethylsilane (TMS) ( $^1\text{H}$  NMR, 0 ppm or  $^1\text{H}$  NMR, 2.5 ppm) as the internal standard. The HPLC experiments were carried out on a Waters e2695 instrument (column: J&K, RP-C18, 5 $\mu$ m, 4.6 $\times$ 150 mm), and the yields of the products were determined by using the corresponding pure compounds as the external standards. The coupling constants were reported in Hertz (Hz). The following abbreviations were used to explain the multiplicities: s = singlet, d = doublet, t = triplet, q = quartet, m = multiplet.

## 2. Optimization of the Reaction Conditions

**Table S1.** Screening the loading of Raney Ni<sup>a</sup>

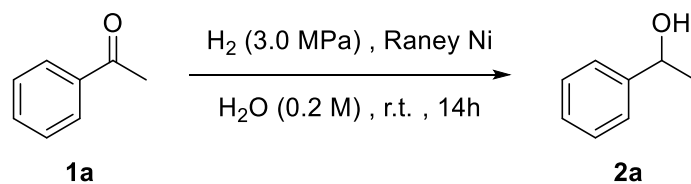

| Entry    | Raney Ni (wt. %) | Yield <sup>b</sup> /% |
|----------|------------------|-----------------------|
| 1        | 2                | 24                    |
| 2        | 4                | 46                    |
| 3        | 6                | 79                    |
| 4        | 8                | 86                    |
| <b>5</b> | <b>10</b>        | <b>99</b>             |
| 6        | 12               | 99                    |

<sup>a</sup>Reaction conditions: acetophenone (**1a**, 120 mg, 1 mmol) and Raney Ni, H<sub>2</sub> (3.0 MPa) and H<sub>2</sub>O (5 mL, 0.2 M) was stirred at room temperature for 14 h in dried stainless-steel high pressure reactor, with built-in magnetic stirring, and total volume of 20 mL.

<sup>b</sup>The yield was determined by HPLC using pure **2a** as the external standard ( $t_{R,2a}$  = 5.3 min,  $\lambda_{max}$  = 209.9 nm; water / methanol = 50 : 50 (v / v)).

**Table S2.** Screening the H<sub>2</sub> pressures<sup>a</sup>

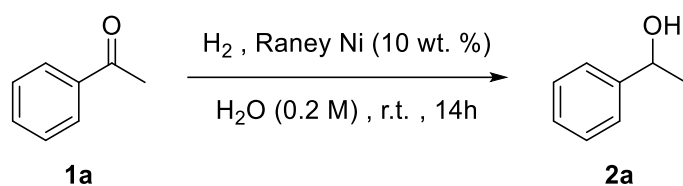

| Entry | H <sub>2</sub> pressures (MPa) | Yield <sup>b</sup> /% |
|-------|--------------------------------|-----------------------|
| 1     | 1.0                            | 85                    |
| 2     | 2.0                            | 92                    |
| 3     | 3.0                            | <b>99</b>             |

<sup>a</sup>Reaction conditions: acetophenone (**1a**, 360 mg, 3 mmol) and Raney Ni (10 wt. %), H<sub>2</sub> and H<sub>2</sub>O (15 mL, 0.2 M) was stirred at room temperature for 14 h in dried stainless-steel high pressure reactor, with built-in magnetic stirring, and total volume of 100 mL.

<sup>b</sup>The yield was determined by HPLC using pure **2a** as the external standard ( $t_{R,2a}$  = 5.3 min,  $\lambda_{max}$  = 209.9 nm; water / methanol = 50 : 50 (v / v)).

**Table S3.** Screening the reaction time<sup>a</sup>

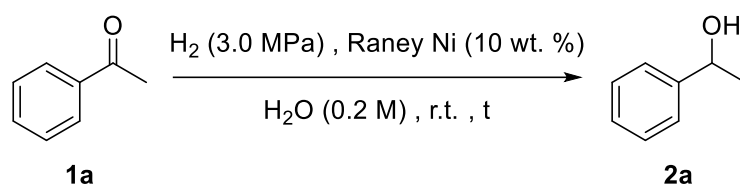

| Entry    | Time (h)  | Yield <sup>b</sup> /% |
|----------|-----------|-----------------------|
| 1        | 4         | 63                    |
| 2        | 6         | 82                    |
| 3        | 8         | 90                    |
| 4        | 10        | 94                    |
| <b>5</b> | <b>12</b> | <b>99</b>             |
| 6        | 14        | 99                    |

<sup>a</sup>Reaction conditions: acetophenone (**1a**, 360 mg, 3 mmol) and Raney Ni (10 wt. %),  $\text{H}_2$  (3.0 MPa) and  $\text{H}_2\text{O}$  (15 mL, 0.2 M) was stirred at room temperature in dried stainless-steel high pressure reactor, with built-in magnetic stirring, and total volume of 100 mL.

<sup>b</sup>The yield was determined by HPLC using pure **2a** as the external standard ( $t_{\text{R},2\text{a}} = 5.3$  min,  $\lambda_{\text{max}} = 209.9$  nm; water / methanol = 50 : 50 (v / v)).

**Table S4.** further optimization of Raney Ni loading<sup>a</sup>

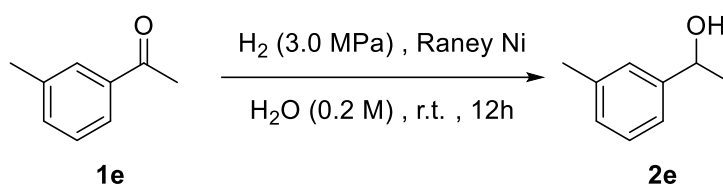

| Entry    | Raney Ni (wt. %) | Yield <sup>b</sup> /% |
|----------|------------------|-----------------------|
| 1        | 10               | 88                    |
| 2        | 15               | 94                    |
| <b>3</b> | <b>20</b>        | <b>99</b>             |
| 4        | 25               | 99                    |
| 5        | 30               | 99                    |

<sup>a</sup>Reaction conditions: 3'-methylacetophenone (**1e**, 134 mg, 1 mmol) and Raney Ni, H<sub>2</sub> (3.0 MPa) and H<sub>2</sub>O (5 mL, 0.2 M) was stirred at room temperature for 12 h in dried stainless-steel high pressure reactor, with built-in magnetic stirring, and total volume of 20 mL.

<sup>b</sup>The yield was determined by HPLC using pure **2e** as the external standard (*t*<sub>R,2e</sub> = 4.8 min, λ<sub>max</sub> = 209.9 nm; water / methanol = 40 : 60 (v / v)).

**Table S5.** Screening the different additives<sup>a</sup>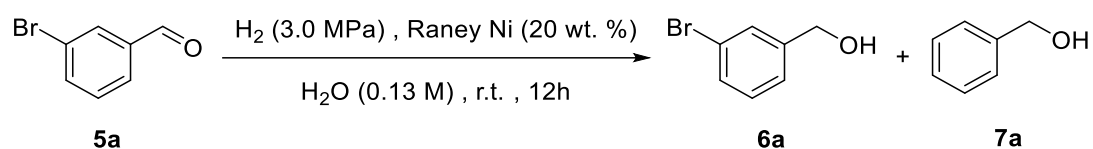

| Entry    | additives <sup>b</sup>      | Ratio [ <b>5a</b> : <b>6a</b> : <b>7a</b> ] <sup>c</sup> |
|----------|-----------------------------|----------------------------------------------------------|
| <b>1</b> | <b>Cyanamide</b>            | <b>15:82:3</b>                                           |
| 2        | Ammonium hydroxide solution | 3:48:49                                                  |
| 3        | Monoethanolamine            | 0:70:30                                                  |
| 4        | Thiourea                    | 99:1:0                                                   |
| 5        | Morpholine                  | 1:63:36                                                  |
| 6        | none                        | 0:80:20                                                  |

<sup>a</sup>Reaction conditions: 3'-Methylacetophenone (**5a**, 134 mg, 1 mmol) and Raney Ni (20 wt. %), additive (4 wt. %), H<sub>2</sub> (3.0 MPa) and H<sub>2</sub>O (8 mL, 0.13 M) was stirred at room temperature for 12 h in dried stainless-steel high pressure reactor, with built-in mechanical stirring paddle, and total volume of 50 mL.

<sup>b</sup>The additive dosage is based on the mass ratio of additive to **5a**, and the mass ratio is 4 wt. %.

<sup>c</sup>The yield was determined by HPLC using pure **6a** and **7a** as the external standard ( $t_{R,6a}$  = 5.7 min,  $\lambda_{max}$  = 219.3 nm;  $t_{R,7a}$  = 3.7 min,  $\lambda_{max}$  = 209.9 nm; water / methanol = 40 : 60 (v / v)).

**Table S6.** Screening the loading of cyanamide<sup>a</sup>

| <b>5a</b> |                                | <b>6a</b> + <b>7a</b>                                    |
|-----------|--------------------------------|----------------------------------------------------------|
| Entry     | Cyanamide <sup>b</sup> (wt. %) | Ratio [ <b>5a</b> : <b>6a</b> : <b>7a</b> ] <sup>c</sup> |
| 1         | 2                              | 0:86:14                                                  |
| 2         | 4                              | 15:82:3                                                  |
| <b>3</b>  | <b>6</b>                       | <b>18:82:0</b>                                           |

<sup>a</sup> Reaction conditions: 3-bromobenzaldehyde (**5a**, 370 mg, 2 mmol), Raney Ni (20 wt. %) and cyanamide, H<sub>2</sub> (3.0 MPa) and H<sub>2</sub>O (15 mL, 0.13 M) was stirred at room temperature for 12 h in dried stainless-steel high pressure reactor, with built-in mechanical stirring paddle, and total volume 50 mL.

<sup>b</sup> Cyanamide dosage is based on the mass ratio of the cyanamide to **5a**.

<sup>c</sup> The yield was determined by HPLC using pure **6a** and **7a** as the external standard ( $t_{R,6a}$  = 5.7 min,  $\lambda_{max}$  = 219.3 nm;  $t_{R,7a}$  = 3.7 min,  $\lambda_{max}$  = 209.9 nm; water / methanol = 40 : 60 (v / v)).

**Table S7.** Screening the reaction time<sup>a</sup>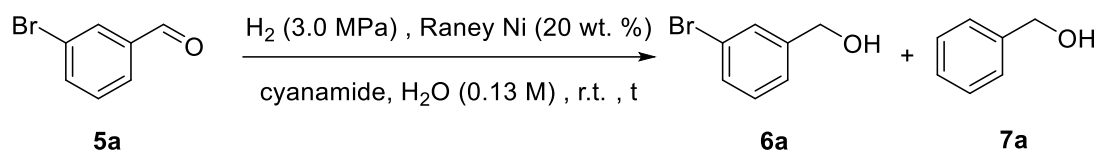

| Entry | Time (h) | Ratio [ <b>5a</b> : <b>6a</b> : <b>7a</b> ] <sup>b</sup> |
|-------|----------|----------------------------------------------------------|
| 1     | 12       | 18:82:0                                                  |
| 2     | 16       | 4:95:1                                                   |
| 3     | 20       | 0:83:17                                                  |

<sup>a</sup> Reaction conditions: 3-bromobenzaldehyde (**5a**, 185 mg, 1 mmol) and Raney Ni (20 wt. %), cyanamide (6 wt. %), H<sub>2</sub> (3.0 MPa) and H<sub>2</sub>O (8 mL, 0.13 M) was stirred at room temperature in dried stainless-steel high pressure reactor, with built-in mechanical stirring paddle, and total volume of 50 mL.

<sup>b</sup> The yield was determined by HPLC using pure **6a** and **7a** as the external standard ( $t_{R,6a}$  = 5.7 min,  $\lambda_{max}$  = 219.3 nm;  $t_{R,7a}$  = 3.7 min,  $\lambda_{max}$  = 209.9 nm; water / methanol = 40 : 60 (v / v)).

**Table S8.** The result of Raney Ni recycling<sup>a</sup>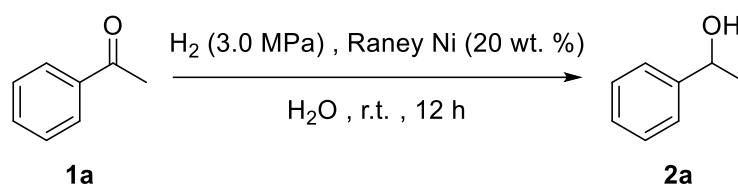

| Entry | Number of reuses | Yield <sup>b</sup> /% |                |                |                |
|-------|------------------|-----------------------|----------------|----------------|----------------|
|       |                  | 1                     | 2 <sup>c</sup> | 3 <sup>c</sup> | 4 <sup>c</sup> |
| 1     | 1                | 100                   | 99             | 100            | 100            |
| 2     | 2                | 99                    | 100            | 99             | 100            |
| 3     | 3                | 100                   | 100            | 98             | 99             |
| 4     | 4                | 98                    | 99             | 100            | 98             |
| 5     | 5                | 96                    | 98             | 99             | 100            |
| 6     | 6                | 98                    | 100            | 97             | 99             |
| 7     | 7                | 97                    | 98             | 100            | 97             |
| 8     | 8                | 99                    | 97             | 97             | 100            |
| 9     | 9                | 100                   | 96             | 100            | 97             |
| 10    | 10               | 98                    | 95             | 96             | 98             |
| 11    | 11               | 95                    | 90             | 92             | 89             |
| 12    | 12               | 75                    | 74             | 80             | 73             |
| 13    | 13               | /                     | 55             | 60             | 52             |
| 14    | 14               | /                     | 44             | 47             | 40             |
| 15    | 15               | /                     | 30             | 33             | 37             |
| 16    | 16               | /                     | 24             | 28             | 20             |

<sup>a</sup> Reaction conditions: acetophenone (**1a**, 360 mg, 3 mmol) and Raney Ni (20 wt. %), H<sub>2</sub> (3.0 MPa) and H<sub>2</sub>O (15 mL, 0.2 M) was stirred at room temperature in dried stainless-steel high pressure reactor, with built-in magnetic stirring, and total volume of 100 mL.

<sup>b</sup> The yield was determined by HPLC using pure **2a** as the external standard (*t*<sub>R,2a</sub> = 5.3 min, λ<sub>max</sub> = 209.9 nm; water / methanol = 50 : 50 (v / v)).

<sup>c</sup> Reaction conditions: acetophenone (**1a**, 3g) and Raney Ni (20 wt. %), H<sub>2</sub> (3.0 MPa) and H<sub>2</sub>O (9 mL) was stirred at room temperature in dried stainless-steel high pressure reactors, with built-in magnetic stirring, and total volume of 100 mL.

### 3. Experimental Procedures

#### 3.1 General procedures for synthesis of the compounds 2

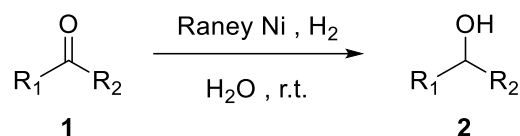

Ketones (3.0 mmol), Raney Ni (10 wt. % or 20 wt. %), H<sub>2</sub> (3.0 MPa), and H<sub>2</sub>O (15 ml) were added to a high pressure reactor equipped with a magnetic stirrer, which total volume of 100 ml. Hydrogen was charged into the reactor at the inlet, and the gas was replaced three times. Reaction kettle filled with hydrogen 3.0 MPa, and the mixture was stirred strongly at room temperature for 12 h (aliphatic ketones was stirred strongly at room temperature for 24 h). Then hydrogen in the reactor was released in the fume hood upon completion. After that, the reaction filtered to remove Raney Ni, washed by ethyl acetate. Then the reaction mixture was extracted with ethyl acetate (3×15 mL) and the combined organic layers were dried over anhydrous sodium sulfate, filtered and concentrated to dryness to obtain product **2**. Raney Ni was recycled.

#### 3.2 General procedures for synthesis of the compounds 4

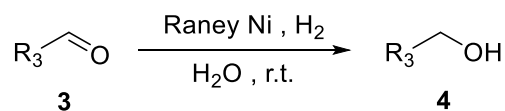

Aldehyde (3.0 mmol), Raney Ni (20 wt. %), H<sub>2</sub> (3.0 MPa) and H<sub>2</sub>O (15 ml) were added to a high pressure reactor equipped with a magnetic stirrer, which total volume of 100 ml. Hydrogen was charged into the reactor at the inlet, and the gas was replaced three times. Reaction kettle filled with hydrogen 3.0 MPa, and the mixture was stirred strongly at room temperature for 6 h (aliphatic aldehyde was stirred strongly at room temperature for 24 h). Then hydrogen in the reactor was released in the fume hood upon completion. After that, the reaction filtered to remove Raney Ni, washed by ethyl acetate. Then the reaction mixture was extracted with ethyl acetate (3×15 mL) and the combined organic layers were dried over anhydrous sodium sulfate, filtered and concentrated to dryness to obtain product **4**. Raney Ni was recycled.

### 3.3 General procedures for synthesis of the compounds 6

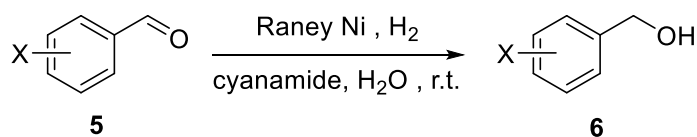

Halogenated aromatic aldehydes (2.0 mmol), Raney Ni (20 wt. %), H<sub>2</sub> (3.0 MPa), cyanamide (6 wt. %) and H<sub>2</sub>O (15 ml) were added to a high pressure reactor that was equipped with a mechanical stirring paddle, which total volume of 50 ml. Hydrogen was charged into the reactor at the inlet, and the gas was replaced three times. Reaction kettle filled with hydrogen 3.0 MPa, and the mixture was stirred strongly at room temperature. Then hydrogen in the reactor was released in the fume hood upon completion. After that, the reaction filtered to remove Raney Ni, washed by ethyl acetate. Then the reaction mixture was extracted with ethyl acetate (3×15 mL) and combined organic layers. Product **6** was obtained through column chromatography purification. Starting material **5** and Raney Ni was recycled.

### 3.4 General procedures for synthesis of the compound 9

Oxcarbazepine (**8**, 3.0 mmol), Raney Ni (20 wt. %), H<sub>2</sub> (4.0 MPa), and H<sub>2</sub>O (15 ml) were added to a high pressure reactor equipped with a magnetic stirrer, which total volume of 100 ml. Hydrogen was charged into the reactor at the inlet, and the gas was replaced three times. Reaction kettle filled with hydrogen 4.0 MPa, and the mixture was stirred strongly at 60°C for 48 h. Then hydrogen in the reactor was released in the fume hood upon completion. After that, the reaction filtered to remove Raney Ni, washed by ethyl acetate. Then the reaction mixture was extracted with ethyl acetate (3×15 mL) and the combined organic layers were dried over anhydrous sodium sulfate, filtered and concentrated to dryness to obtain product **9**. Raney Ni was recycled.

### 3.5 General procedures for synthesis of the compound **11**

Estrone (**10**, 3.0 mmol), Raney Ni (30 wt. %), H<sub>2</sub> (4.0 MPa), and H<sub>2</sub>O (15 ml) were added to a high pressure reactor equipped with a magnetic stirrer, which total volume of 100 ml. Hydrogen was charged into the reactor at the inlet, and the gas was replaced three times. Reaction kettle filled with hydrogen 4.0 MPa, and the mixture was stirred strongly at 60°C for 48 h. Then hydrogen in the reactor was released in the fume hood upon completion. After that, the reaction filtered to remove Raney Ni, washed by ethyl acetate. Then the reaction mixture was extracted with ethyl acetate (3×15 mL) and combined organic layers. Product **11** was obtained through column chromatography purification. Raney Ni was recycled.

### 3.6 General procedures for synthesis of the compound **13**

Tropinone (**12**, 3.0 mmol), Raney Ni (20 wt. %), H<sub>2</sub> (3.0 MPa), and H<sub>2</sub>O (15 ml) were added to a high pressure reactor equipped with a magnetic stirrer, which total volume of 100 ml. Hydrogen was charged into the reactor at the inlet, and the gas was replaced three times. Reaction kettle filled with hydrogen 3.0 MPa, and the mixture was stirred strongly at room temperature for 24 h. Then hydrogen in the reactor was released in the fume hood upon completion. After that, the reaction filtered to remove Raney Ni, washed by ethyl acetate. Then the reaction mixture was extracted with ethyl acetate (3×15 mL) and the combined organic layers were dried over anhydrous sodium sulfate, filtered and concentrated to dryness to obtain product **13**. Raney Ni was recycled.

### 3.7 General procedures for synthesis of the compound **15**

Vanillin (**14**, 3.0 mmol), Raney Ni (20 wt. %), H<sub>2</sub> (3.0 MPa), and H<sub>2</sub>O (15 ml) were added to a high pressure reactor equipped with a magnetic stirrer, which total volume of 100 ml. Hydrogen was charged into the reactor at the inlet, and the gas was replaced three times. Reaction kettle filled with hydrogen 3.0 MPa, and the mixture was stirred strongly at room temperature for 12 h. Then hydrogen in the reactor was released in the fume hood upon completion. After that, the reaction filtered to remove Raney Ni, washed by ethyl acetate. Then the reaction mixture was extracted with ethyl acetate (3×15 mL) and combined organic layers. Product **15** was obtained through column chromatography purification. Raney Ni was recycled.

#### 4. Characterization

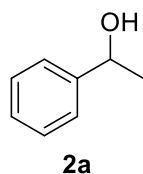

*1-phenylethanol (2a)*. Colorless liquid. (352 mg, 96%). The NMR data is identical to that reported in literature.<sup>1</sup> **<sup>1</sup>H NMR (500 MHz, CDCl<sub>3</sub>)**  $\delta$  7.36-7.24 (m, 5H), 4.87 (q,  $J = 6.5$  Hz, 1H), 1.96 (s, 1H), 1.48 (d,  $J = 6.5$  Hz, 3H).

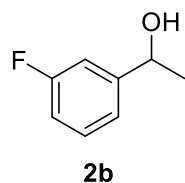

*3-fluoro-1-phenylethanol (2b)*. Colorless liquid. (407 mg, 97%). The NMR data is identical to that reported in literature.<sup>1</sup> **<sup>1</sup>H NMR (500 MHz, CDCl<sub>3</sub>)**  $\delta$  7.32-7.27 (m, 1H), 7.13-7.08 (m, 2H), 6.97-6.93 (m, 1H), 4.88 (qd,  $J_1 = 6.5$  Hz,  $J_2 = 2.5$  Hz, 1H), 1.97 (s, 1H), 1.47 (dd,  $J_1 = 6.5$  Hz,  $J_2 = 1.5$  Hz, 3H).

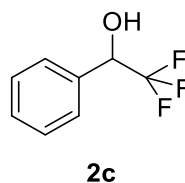

*1-phenyl-2,2,2-trifluoroethanol (2c)*. Colorless liquid. (517 mg, 98%). The NMR data is identical to that reported in literature.<sup>1</sup> **<sup>1</sup>H NMR (500 MHz, CDCl<sub>3</sub>)**  $\delta$  7.46-7.45 (m, 2H), 7.41-7.39 (m, 3H), 5.01-4.96 (m, 1H), 2.88 (d,  $J = 4.0$  Hz, 1H).

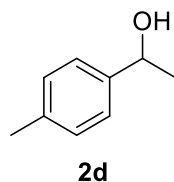

*1-(4-methylphenyl)ethanol (2d)*. Colorless liquid. (392 mg, 96%). The NMR data is identical to that reported in literature.<sup>1</sup> **<sup>1</sup>H NMR (500 MHz, CDCl<sub>3</sub>)**  $\delta$  7.24 (d,  $J = 8.0$  Hz, 2H), 7.14 (d,  $J = 8.0$  Hz, 2H), 4.84 (q,  $J = 6.5$  Hz, 1H), 2.33 (s, 3H), 1.93 (s, 1H), 1.46 (d,  $J = 6.5$  Hz, 3H).

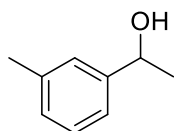

**2e**

*1-(3-methylphenyl)ethanol (2e)*. Colorless liquid. (396 mg, 97%). The NMR data is identical to that reported in literature.<sup>1</sup> **<sup>1</sup>H NMR (500 MHz, CDCl<sub>3</sub>)**  $\delta$  7.23 (t,  $J$  = 7.0 Hz, 1H), 7.18-7.14 (m, 2H), 7.08 (d,  $J$  = 7.5 Hz, 1H), 4.84 (q,  $J$  = 6.5 Hz, 1H), 2.35 (s, 3H), 1.92 (s, 1H), 1.48 (d,  $J$  = 6.5 Hz, 3H).

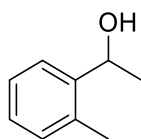

**2f**

*1-(2-methylphenyl)ethanol (2f)*. Colorless liquid. (388 mg, 95%). The NMR data is identical to that reported in literature.<sup>1</sup> **<sup>1</sup>H NMR (500 MHz, CDCl<sub>3</sub>)**  $\delta$  7.44 (d,  $J$  = 7.5 Hz, 1H), 7.19-7.16 (m, 1H), 7.13-7.07 (m, 2H), 5.01 (q,  $J$  = 6.0 Hz, 1H), 2.49 (s, 1H), 2.27 (s, 3H), 1.38 (d,  $J$  = 6.5 Hz, 3H).

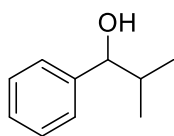

**2g**

*2-methyl-1-phenyl-1-propanol (2g)*. Colorless liquid. (388 mg, 95%). The NMR data is identical to that reported in literature.<sup>2</sup> **<sup>1</sup>H NMR (500 MHz, CDCl<sub>3</sub>)**  $\delta$  7.34-7.24 (m, 5H), 4.34 (d,  $J$  = 7.0 Hz, 1H), 1.98-1.90 (m, 2H), 0.99 (d,  $J$  = 6.5 Hz, 3H), 0.79 (d,  $J$  = 7.0 Hz, 3H).

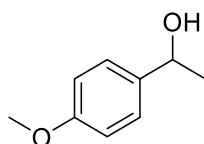

**2h**

*1-(4-methoxyphenyl)ethanol (2h)*. Colorless oil. (447 mg, 98%). The NMR data is identical to that reported in literature.<sup>1</sup> **<sup>1</sup>H NMR (500 MHz, CDCl<sub>3</sub>)**  $\delta$  7.29-7.26 (m, 2H), 6.87-6.85 (m, 2H), 4.82 (q,  $J$  = 6.5 Hz, 1H), 3.78 (s, 3H), 2.05 (s, 1H), 1.45 (d,  $J$  = 6.0 Hz, 3H).

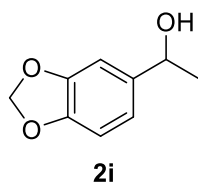

*1-(benzo[d][1,3]dioxol-5-yl)ethanol (2i)*. Colorless oil. (478 mg, 96%). The NMR data is identical to that reported in literature.<sup>3</sup> **<sup>1</sup>H NMR (500 MHz, CDCl<sub>3</sub>)**  $\delta$  6.88 (s, 1H), 6.81-6.75 (m, 2H), 5.93 (s, 2H), 4.81 (q,  $J$  = 6.5 Hz, 1H), 1.89 (s, 1H), 1.45 (d,  $J$  = 6.5 Hz, 3H).

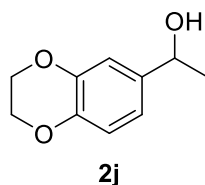

*1-(2,3-dihydrobenzo[b][1,4]dioxin-6-yl)ethan-1-ol (2j)*. Colorless oil. (478 mg, 96%). The NMR data is identical to that reported in literature.<sup>4</sup> **<sup>1</sup>H NMR (500 MHz, CDCl<sub>3</sub>)**  $\delta$  6.87 (s, 1H), 6.83-6.80 (m, 2H), 4.76 (q,  $J$  = 6.5 Hz, 1H), 4.22 (s, 4H), 2.13 (s, 1H), 1.43 (d,  $J$  = 6.5 Hz, 3H).

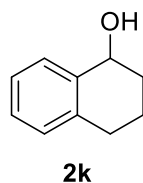

*1,2,3,4-tetrahydro-1-naphthol (2k)*. clear liquid. (440 mg, 99%). The NMR data is identical to that reported in literature.<sup>5</sup> **<sup>1</sup>H NMR (500 MHz, CDCl<sub>3</sub>)**  $\delta$  7.39-7.36 (m, 1H), 7.20-7.14 (m, 2H), 7.07-7.04 (m, 1H), 4.69 (t,  $J$  = 4.0 Hz, 1H), 2.80-2.64 (m, 2H), 2.24 (s, 1H), 1.96-1.69 (m, 4H).

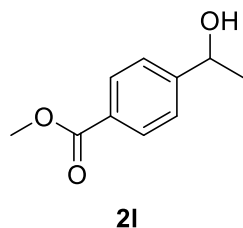

*4-(methoxycarbonyl)-alpha-methylbenzyl alcohol (2l)*. white solid. (524 mg, 97%). The NMR data is identical to that reported in literature.<sup>6</sup> **<sup>1</sup>H NMR (500 MHz, CDCl<sub>3</sub>)**  $\delta$  7.99 (d,  $J$  = 7.0 Hz, 2H), 7.42 (d,  $J$  = 7.0 Hz, 2H), 4.94 (q,  $J$  = 6.0 Hz, 1H), 3.90 (s, 3H),

2.41 (s, 1H), 1.49 (d,  $J = 6.5$  Hz, 3H).

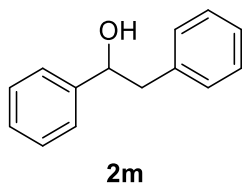

*1,2-diphenylethanol alcohol (2m)*. white solid. (588 mg, 99%). The NMR data is identical to that reported in literature.<sup>5</sup> **<sup>1</sup>H NMR (500 MHz, CDCl<sub>3</sub>)**  $\delta$  7.31-7.17 (m, 8H), 7.15 (d,  $J = 7.5$  Hz, 2H), 4.83 (dd,  $J_1 = 8.0$  Hz,  $J_2 = 5.0$  Hz, 1H), 3.02-2.93 (m, 2H), 2.11 (s, 1H).

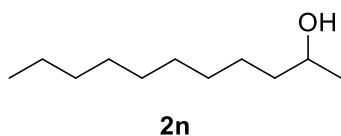

*2-undecanol (2n)*. clear liquid. (491 mg, 95%). The NMR data is identical to that reported in literature.<sup>7</sup> **<sup>1</sup>H NMR (500 MHz, CDCl<sub>3</sub>)**  $\delta$  3.81-3.75 (m, 1H), 1.56 (s, 1H), 1.50-1.39 (m, 3H), 1.28-1.26 (m, 13H), 1.18 (d,  $J = 6.5$  Hz, 3H), 0.88 (t,  $J = 7.0$  Hz, 3H).

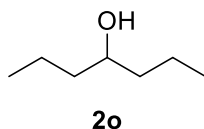

*4-heptanol (2o)*. pale yellow liquid. (271 mg, 78%). The NMR data is identical to that reported in literature.<sup>8</sup> **<sup>1</sup>H NMR (500 MHz, CDCl<sub>3</sub>)**  $\delta$  3.63-3.58 (m, 1H), 1.69 (s, 1H), 1.50-1.31 (m, 8H), 0.93 (t,  $J = 7.5$  Hz, 6H).

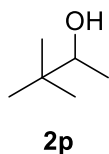

*3,3-dimethyl-2-butanol (2p)*. colorless liquid. (208 mg, 68%). The NMR data is identical to that reported in literature.<sup>5</sup> **<sup>1</sup>H NMR (500 MHz, CDCl<sub>3</sub>)**  $\delta$  3.49-3.45 (m, 1H), 1.73 (s, 1H), 1.11 (d,  $J = 6.5$  Hz, 3H), 0.89 (s, 9H).

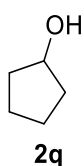

*cyclopentanol (2q)*. colorless liquid. (180 mg, 70%). The NMR data is identical to that reported in literature.<sup>9</sup> **<sup>1</sup>H NMR (500 MHz, CDCl<sub>3</sub>)**  $\delta$  4.33 (s, 1H), 1.76-1.70 (m, 5H), 1.60-1.56 (m, 4H).

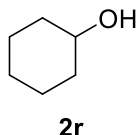

*cyclohexanol (2r)*. colorless liquid. (204 mg, 68%). The NMR data is identical to that reported in literature.<sup>6</sup> **<sup>1</sup>H NMR (500 MHz, CDCl<sub>3</sub>)**  $\delta$  3.61-3.57 (m, 1H), 2.53 (s, 1H), 1.89-1.86 (m, 2H), 1.74-1.71 (m, 2H), 1.56-1.53 (m, 1H), 1.29-1.15 (m, 5H).

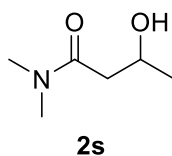

*3-hydroxy-N,N-dimethylbutanamide (2s)*. colorless liquid. (373 mg, 95%). The NMR data is identical to that reported in literature.<sup>10</sup> **<sup>1</sup>H NMR (500 MHz, CDCl<sub>3</sub>)**  $\delta$  4.44 (s, 1H), 4.22-4.16 (m, 1H), 3.00 (s, 3H), 2.96 (s, 3H), 2.50-2.46 (m, 1H), 2.34-2.28 (m, 1H), 1.22 (d,  $J$  = 6.5 Hz, 3H).

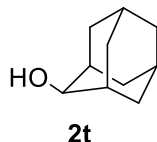

*2-adamantanol (2t)*. white crystalline powder. (433 mg, 95%). The NMR data is identical to that reported in literature.<sup>9</sup> **<sup>1</sup>H NMR (500 MHz, CDCl<sub>3</sub>)**  $\delta$  3.87 (s, 1H), 2.07 (d,  $J$  = 12.5 Hz, 2H), 1.88-1.80 (m, 6H), 1.71-1.68 (m, 5H), 1.52 (d,  $J$  = 13.0 Hz, 2H).

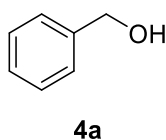

*benzyl alcohol (4a)*. colorless liquid. (321 mg, 99%). The NMR data is identical to that reported in literature.<sup>1</sup> **<sup>1</sup>H NMR (500 MHz, CDCl<sub>3</sub>)**  $\delta$  7.33-7.24 (m, 5H), 4.58 (s, 2H), 2.89 (s, 1H).

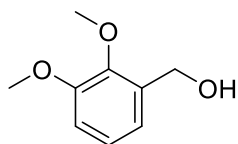

**4b**

*2,3-dimethoxybenzyl alcohol (4b)*. white crystalline solid. (494 mg, 98%). The NMR data is identical to that reported in literature.<sup>11</sup> **<sup>1</sup>H NMR (500 MHz, CDCl<sub>3</sub>)**  $\delta$  7.04 (t,  $J$  = 7.5 Hz, 1H), 6.92 (d,  $J$  = 7.5 Hz, 1H), 6.87 (d,  $J$  = 8.0 Hz, 1H), 4.68 (s, 2H), 3.87 (d,  $J$  = 7.0 Hz, 6H), 2.38 (s, 1H).

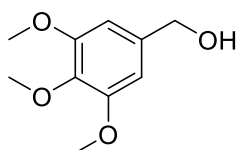

**4c**

*(3,4,5-trimethoxyphenyl)methanol (4c)*. yellow oil. (588 mg, 99%). The NMR data is identical to that reported in literature.<sup>1</sup> **<sup>1</sup>H NMR (500 MHz, CDCl<sub>3</sub>)**  $\delta$  6.58 (s, 2H), 4.60 (s, 2H), 3.83 (d,  $J$  = 9.5 Hz, 9H), 2.45 (s, 1H).

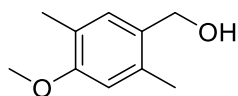

**4d**

*2,5-dimethyl-4-methoxybenzyl alcohol (4d)*. colorless liquid. (473 mg, 95%). The NMR data is identical to that reported in literature.<sup>12</sup> **<sup>1</sup>H NMR (500 MHz, CDCl<sub>3</sub>)**  $\delta$  7.03 (s, 1H), 6.63 (s, 1H), 4.53 (s, 2H), 3.79 (s, 3H), 2.31 (s, 3H), 2.16 (s, 3H), 1.95 (s, 1H).

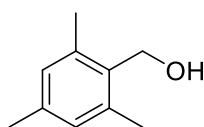

**4e**

*2,4,6-trimethylbenzyl alcohol (4e)*. colorless liquid. (441 mg, 98%). The NMR data is identical to that reported in literature.<sup>13</sup> **<sup>1</sup>H NMR (500 MHz, CDCl<sub>3</sub>)**  $\delta$  6.85 (s, 2H), 4.66 (s, 2H), 2.37 (s, 6H), 2.25 (s, 3H), 1.43 (s, 1H).

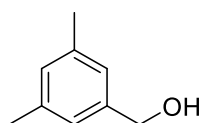

**4f**

*3,5-dimethylbenzyl alcohol (4f)*. colorless liquid. (400 mg, 98%). The NMR data is identical to that reported in literature.<sup>13</sup> **<sup>1</sup>H NMR (500 MHz, CDCl<sub>3</sub>)**  $\delta$  6.95 (s, 2H), 6.91 (s, 1H), 4.57 (s, 2H), 2.30 (s, 6H), 2.17 (s, 1H).

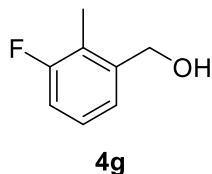

*3-fluoro-2-methyl-benzenemethanol (4g)*. colorless liquid. (400 mg, 95%). The NMR data is identical to that reported in literature.<sup>14</sup> **<sup>1</sup>H NMR (500 MHz, CDCl<sub>3</sub>)**  $\delta$  7.13-7.11 (m, 2H), 6.97-6.93 (m, 1H), 4.63 (s, 2H), 2.22 (d,  $J$  = 2.0 Hz, 3H).

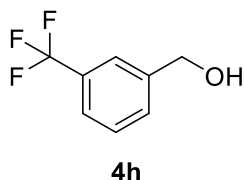

*3-(trifluoromethyl)benzyl alcohol (4h)*. clear liquid. (507 mg, 96%). The NMR data is identical to that reported in literature.<sup>15</sup> **<sup>1</sup>H NMR (500 MHz, CDCl<sub>3</sub>)**  $\delta$  7.59 (s, 1H), 7.53-7.42 (m, 3H), 4.68 (s, 2H), 2.71 (s, 1H).

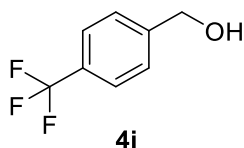

*4-(trifluoromethyl)benzyl alcohol (4i)*. colorless liquid. (512 mg, 97%). The NMR data is identical to that reported in literature.<sup>1</sup> **<sup>1</sup>H NMR (500 MHz, CDCl<sub>3</sub>)**  $\delta$  7.59 (d,  $J$  = 8.0 Hz, 2H), 7.43 (d,  $J$  = 7.5 Hz, 2H), 4.70 (s, 2H), 2.52 (s, 1H).

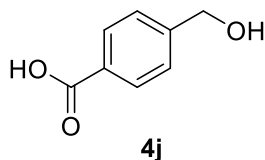

*4-(hydroxymethyl)benzoic acid (4j)*. white coarse fibers. (433 mg, 95%). The NMR data is identical to that reported in literature.<sup>15</sup> **<sup>1</sup>H NMR (500 MHz, DMSO-*d*<sub>6</sub>)**  $\delta$  12.84 (s, 1H), 7.91 (d,  $J$  = 8.5 Hz, 2H), 7.44 (d,  $J$  = 8.0 Hz, 2H), 5.33 (s, 1H), 4.58 (s, 2H).

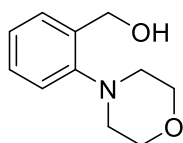

**4k**

*(2-morpholinophenyl)methanol (4k)*. white powder. (556 mg, 96%). The NMR data is identical to that reported in literature.<sup>16</sup> **<sup>1</sup>H NMR (500 MHz, CDCl<sub>3</sub>)**  $\delta$  7.28 (t,  $J$  = 7.5 Hz, 1H), 7.23 (d,  $J$  = 7.0 Hz, 1H), 7.18 (d,  $J$  = 8.0 Hz, 1H), 7.12 (t,  $J$  = 7.5 Hz, 1H), 4.94 (s, 1H), 4.79 (s, 2H), 3.85 (t,  $J$  = 4.5 Hz, 4H), 2.97 (t,  $J$  = 4.5 Hz, 4H).

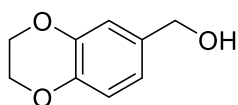

**4l**

*2,3-dihydro-1,4-benzodioxin-6-methanol (4l)*. brown oil. (483 mg, 97%). The NMR data is identical to that reported in literature.<sup>17</sup> **<sup>1</sup>H NMR (500 MHz, CDCl<sub>3</sub>)**  $\delta$  6.83-6.77 (m, 3H), 4.49 (d,  $J$  = 4.0 Hz, 2H), 4.20 (d,  $J$  = 3.5 Hz, 4H), 2.44 (s, 1H).

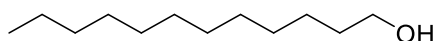

**4m**

*1-dodecanol (4m)*. colorless liquid. (547 mg, 98%). The NMR data is identical to that reported in literature.<sup>18</sup> **<sup>1</sup>H NMR (500 MHz, CDCl<sub>3</sub>)**  $\delta$  3.61 (t,  $J$  = 6.5 Hz, 2H), 2.25 (s, 1H), 1.58-1.53 (m, 2H), 1.33-1.26 (m, 18H), 0.88 (t,  $J$  = 6.5 Hz, 3H).

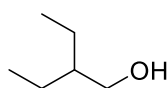

**4n**

*2-ethyl-1-butanol (4n)*. clear liquid. (459 mg, 75%). The NMR data is identical to that reported in literature.<sup>19</sup> **<sup>1</sup>H NMR (500 MHz, CDCl<sub>3</sub>)**  $\delta$  3.48 (d,  $J$  = 4.5 Hz, 2H), 2.02 (s, 1H), 1.35-1.23 (m, 5H), 0.87-0.81 (m, 6H).

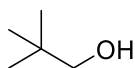

**4o**

*neopentyl alcohol (4o)*. colorless waxy crystalline solid. (317 mg, 60%). The NMR data is identical to that reported in literature.<sup>20</sup> **<sup>1</sup>H NMR (500 MHz, CDCl<sub>3</sub>)**  $\delta$  3.29 (s, 2H),

2.41 (s, 1H), 0.91 (s, 9H).

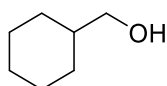

**4p**

*cyclohexanemethanol (4p)*. colorless oil. (582 mg, 85%). The NMR data is identical to that reported in literature.<sup>6</sup> <sup>1</sup>H NMR (500 MHz, CDCl<sub>3</sub>) δ 3.35 (d, *J* = 6.5 Hz, 2H), 2.31 (s, 1H), 1.69-1.58 (m, 5H), 1.44-1.36 (m, 1H), 1.20-1.05 (m, 3H), 0.90-0.82 (m, 2H).

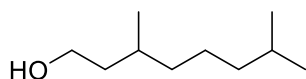

**4q**

*3,7-dimethyl-1-octanol (4q)*. colorless liquid. (441 mg, 93%). The NMR data is identical to that reported in literature.<sup>21</sup> <sup>1</sup>H NMR (500 MHz, CDCl<sub>3</sub>) δ 3.71-3.62 (m, 2H), 1.81 (s, 1H), 1.68-1.08 (m, 11H), 0.91-0.86 (m, 8H).

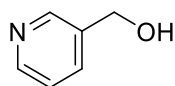

**4r**

*3-pyridinemethanol (4r)*. light yellow liquid. (320 mg, 98%). The NMR data is identical to that reported in literature.<sup>13</sup> <sup>1</sup>H NMR (500 MHz, CDCl<sub>3</sub>) δ 7.19-7.17 (m, 1H), 7.08-7.05 (m, 1H), 6.45-6.43 (m, 1H), 5.99-5.96 (m, 1H), 5.00 (s, 1H), 3.42-3.38 (m, 2H).

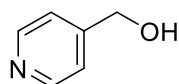

**4s**

*4-pyridinemethanol (4s)*. white crystalline powder. (320 mg, 98%). The NMR data is identical to that reported in literature.<sup>22</sup> <sup>1</sup>H NMR (500 MHz, CDCl<sub>3</sub>) δ 8.54-8.44 (m, 2H), 7.30-7.28 (m, 2H), 4.73 (s, 2H), 3.84 (s, 1H).

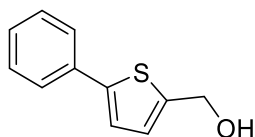

**4t**

*(5-phenyl-2-thienyl)methanol (4t)*. white crystalline powder. (542 mg, 95%). The NMR

data is identical to that reported in literature.<sup>23</sup> **<sup>1</sup>H NMR (500 MHz, CDCl<sub>3</sub>)**  $\delta$  7.57 (d,  $J = 7.5$  Hz, 2H), 7.38-7.34 (m, 2H), 7.28-7.24 (m, 1H), 7.16 (d,  $J = 3.5$  Hz, 1H), 6.96 (d,  $J = 3.5$  Hz, 1H), 4.80 (s, 2H), 2.03 (s, 1H).

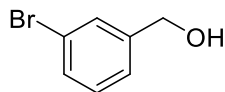

**6a**

*3-bromobenzyl alcohol (6a)*. light yellow liquid. (325 mg, 87%). The NMR data is identical to that reported in literature.<sup>6</sup> **<sup>1</sup>H NMR (500 MHz, CDCl<sub>3</sub>)**  $\delta$  7.52 (s, 1H), 7.41 (d,  $J = 8.0$  Hz, 1H), 7.27 (d,  $J = 7.5$  Hz, 1H), 7.22 (t,  $J = 8.0$  Hz, 1H), 4.66 (s, 2H), 1.95 (s, 1H).

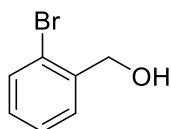

**6b**

*2-bromobenzyl alcohol (6b)*. white solid. (299 mg, 80%). The NMR data is identical to that reported in literature.<sup>16</sup> **<sup>1</sup>H NMR (500 MHz, CDCl<sub>3</sub>)**  $\delta$  7.55 (d,  $J = 8.0$  Hz, 1H), 7.49 (d,  $J = 7.5$  Hz, 1H), 7.34 (t,  $J = 7.5$  Hz, 1H), 7.16 (td,  $J_1 = 8.0$  Hz,  $J_2 = 2.0$  Hz, 1H), 4.76 (s, 2H), 2.01 (s, 1H).

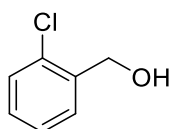

**6c**

*2-chlorobenzyl alcohol (6c)*. white crystalline powder. (242 mg, 85%). The NMR data is identical to that reported in literature.<sup>6</sup> **<sup>1</sup>H NMR (500 MHz, CDCl<sub>3</sub>)**  $\delta$  7.48 (dd,  $J_1 = 7.5$  Hz,  $J_2 = 1.5$  Hz, 1H), 7.36 (dd,  $J_1 = 8.0$  Hz,  $J_2 = 1.0$  Hz, 1H), 7.30-7.22 (m, 2H), 4.79 (s, 2H), 1.98 (s, 1H).

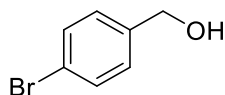

**6d**

*4-bromobenzyl alcohol (6d)*. white crystalline powder. (261 mg, 70%). The NMR data is identical to that reported in literature.<sup>6</sup> **<sup>1</sup>H NMR (500 MHz, CDCl<sub>3</sub>)**  $\delta$  7.48 (d,  $J =$

8.5 Hz, 2H), 7.23 (d,  $J = 8.5$  Hz, 2H), 4.65 (s, 2H), 1.77 (s, 1H).

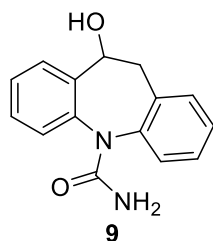

**Licarbazepine (9).** Light yellow solid powder. (719 mg, 95%). The NMR data is identical to that reported in literature.<sup>24</sup> **<sup>1</sup>H NMR (500 MHz, DMSO-*d*<sub>6</sub>)**  $\delta$  7.51 (d,  $J = 7.0$  Hz, 1H), 7.33-7.28 (m, 3H), 7.25-7.18 (m, 4H), 5.73 (d,  $J = 7.0$  Hz, 2H), 5.63 (s, 1H), 5.10 (s, 1H), 3.32 (s, 2H).

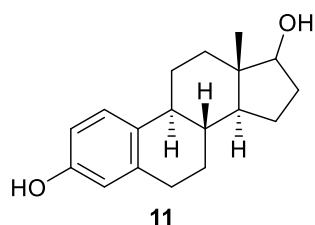

**$\beta$ -Estradiol (11).** White powder. (694 mg, 85%). The NMR data is identical to that reported in literature.<sup>23</sup> **<sup>1</sup>H NMR (500 MHz, CDCl<sub>3</sub>)**  $\delta$  8.95 (s, 1H), 7.03 (d,  $J = 8.5$  Hz, 1H), 6.50 (dd,  $J_1 = 8.5$  Hz,  $J_2 = 2.0$  Hz, 1H), 6.43 (s, 1H), 4.47 (d,  $J = 4.5$  Hz, 1H), 3.53-3.49 (m, 1H), 2.75-2.65 (m, 2H), 2.24-2.20 (m, 1H), 2.08-2.03 (m, 1H), 1.88-1.74 (m, 2H), 1.60-1.54 (m, 1H), 1.40-1.06 (m, 8H), 0.66 (s, 3H).

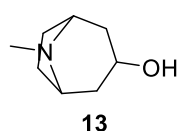

**Tropine (13).** white crystalline powder. (415 mg, 98%). The NMR data is identical to that reported in literature.<sup>25</sup> **<sup>1</sup>H NMR (500 MHz, CDCl<sub>3</sub>)**  $\delta$  4.24 (s, 1H), 3.77 (s, 1H), 2.91 (s, 2H), 2.11 (s, 3H), 2.01-1.98 (m, 2H), 1.86-1.80 (m, 4H), 1.52 (d,  $J = 13.5$  Hz, 2H).

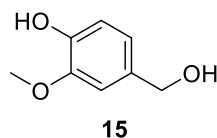

*Vanillyl alcohol (15)*. white crystalline powder. (416 mg, 90%). The NMR data is identical to that reported in literature.<sup>26</sup> **<sup>1</sup>H NMR (500 MHz, CDCl<sub>3</sub>)**  $\delta$  8.73 (s, 1H), 6.88 (s, 1H), 6.70 (t,  $J$  = 8.5 Hz, 2H), 4.97 (t,  $J$  = 5.5 Hz, 1H), 4.37 (d,  $J$  = 5.5 Hz, 2H), 3.75 (s, 3H).

## 5. References

1. Liu, Y.; He, S.; Quan, Z.; Cai, H.; Zhao, Y.; Wang, B., Mild palladium-catalysed highly efficient hydrogenation of C≡N, C–NO<sub>2</sub>, and C=O bonds using H<sub>2</sub> of 1 atm in H<sub>2</sub>O. *Green Chemistry* **2019**, *21* (4), 830-838.
2. Yamada, T.; Kobayashi, Y.; Ito, N.; Ichikawa, T.; Park, K.; Kunishima, K.; Ueda, S.; Mizuno, M.; Adachi, T.; Sawama, Y.; Monguchi, Y.; Sajiki, H., Polyethyleneimine-Modified Polymer as an Efficient Palladium Scavenger and Effective Catalyst Support for a Functional Heterogeneous Palladium Catalyst. *ACS Omega* **2019**, *4* (6), 10243-10251.
3. Verma, P. K.; Sharma, U.; Kumar, N.; Bala, M.; Kumar, V.; Singh, B., Nickel Phthalocyanine Assisted Highly Efficient and Selective Carbonyl Reduction in Polyethylene Glycol-400. *Catalysis Letters* **2012**, *142* (7), 907-913.
4. Yang, W.; Chernyshov, I. Y.; van Schendel, R. K. A.; Weber, M.; Müller, C.; Filonenko, G. A.; Pidko, E. A., Robust and efficient hydrogenation of carbonyl compounds catalysed by mixed donor Mn(I) pincer complexes. *Nature Communications* **2021**, *12* (1).
5. Mummadi, S.; Brar, A.; Wang, G.; Kenefake, D.; Diaz, R.; Unruh, D. K.; Li, S.; Krempner, C., “Inverse” Frustrated Lewis Pairs: An Inverse FLP Approach to the Catalytic Metal Free Hydrogenation of Ketones. *Chemistry – A European Journal* **2018**, *24* (62), 16526-16531.
6. Wang, R.; Yue, Y.; Qi, J.; Liu, S.; Song, A.; Zhuo, S.; Xing, L.-B., Ambient-pressure highly active hydrogenation of ketones and aldehydes catalyzed by a metal-ligand bifunctional iridium catalyst under base-free conditions in water. *Journal of Catalysis* **2021**, *399*, 1-7.
7. Li, H.; Wei, D.; Bruneau-Voisine, A.; Ducamp, M.; Henrion, M.; Roisnel, T.; Dorcet, V.; Darcel, C.; Carpentier, J.-F.; Soulé, J.-F.; Sortais, J.-B., Rhenium and Manganese Complexes Bearing Amino-Bis(phosphinite) Ligands: Synthesis, Characterization, and Catalytic Activity in Hydrogenation of Ketones. *Organometallics* **2018**, *37* (8), 1271-1279.
8. Mahdi, T.; Stephan, D. W., Facile Protocol for Catalytic Frustrated Lewis Pair Hydrogenation and Reductive Deoxygenation of Ketones and Aldehydes. *Angewandte Chemie International Edition* **2015**, *54* (29), 8511-8514.
9. Battilocchio, C.; Deadman, B. J.; Nikbin, N.; Kitching, M. O.; Baxendale, I. R.; Ley, S. V., A Machine-Assisted Flow Synthesis of SR48692: A Probe for the Investigation of Neurotensin Receptor-1. *Chemistry – A European Journal* **2013**, *19* (24), 7917-7930.
10. Solé, C.; Fernández, E., Alkoxide Activation of Aminoboranes towards Selective Amination. *Angewandte Chemie International Edition* **2013**, *52* (43), 11351-11355.
11. Momm, S. N.; Brückner, R., Syntheses of 6,7-Benzotropolones by a Sequence of Acylation (or  $\alpha$ -Hydroxyalkylation/Oxidation), Ring-Closing Metathesis, and Hydrolysis/ $\beta$ -Elimination. *The Journal of Organic Chemistry* **2022**, *87* (22), 15415-15420.
12. Upul Ranaweera, R. R. A.; Rajam, S.; Gudmundsdottir, A. D., Phenylethanol derivatives as triplet sensitizers for 1-azidoadamantane. *Journal of Physical Organic Chemistry* **2011**, *24* (10), 902-908.
13. Sharma, A.; So, S.; Kim, J.-H.; MacMillan, S. N.; Baik, M.-H.; Trovitch, R. J., An aryl diimine cobalt(i) catalyst for carbonyl hydrosilylation. *Chemical Communications* **2022**, *58* (77), 10793-10796.
14. R., F.; Lauritsen; Lunding, A., A study of the bioconversion potential of the fungus *Bjerkandera adusta* with respect to a production of chlorinated aromatic compounds. *Enzyme and Microbial Technology* **1998**, *22* (6), 459-465.

15. Pandrala, M.; Resendez, A.; Malhotra, S. V., Polypyridyl iridium(III) based catalysts for highly chemoselective hydrogenation of aldehydes. *Journal of Catalysis* **2019**, *378*, 283-288.
16. Kaval, N.; Halasz-Dajka, B.; Vo-Thanh, G.; Dehaen, W.; Van der Eycken, J.; Mátyus, P.; Loupy, A.; Van der Eycken, E., An efficient microwave-assisted solvent-free synthesis of pyrido-fused ring systems applying the tert-amino effect. *Tetrahedron* **2005**, *61* (38), 9052-9057.
17. Aboo, A. H.; Bennett, E. L.; Deeprose, M.; Robertson, C. M.; Iggo, J. A.; Xiao, J., Methanol as hydrogen source: transfer hydrogenation of aromatic aldehydes with a rhodacycle. *Chemical Communications* **2018**, *54* (83), 11805-11808.
18. Osako, T.; Torii, K.; Hirata, S.; Uozumi, Y., Chemoselective Continuous-Flow Hydrogenation of Aldehydes Catalyzed by Platinum Nanoparticles Dispersed in an Amphiphilic Resin. *ACS Catalysis* **2017**, *7* (10), 7371-7377.
19. Moore, C. M.; Staples, O.; Jenkins, R. W.; Brooks, T. J.; Semelsberger, T. A.; Sutton, A. D., Acetaldehyde as an ethanol derived bio-building block: an alternative to Guerbet chemistry. *Green Chemistry* **2017**, *19* (1), 169-174.
20. Zhang, G.; Zeng, H.; Li, S.; Johnson, J.; Mo, Z.; Neary, M. C.; Zheng, S., 1-D manganese(ii)-terpyridine coordination polymers as precatalysts for hydrofunctionalisation of carbonyl compounds. *Dalton Transactions* **2020**, *49* (8), 2610-2615.
21. Tian, Z.; Li, Q.; Hou, J.; Li, Y.; Ai, S., Highly selective hydrogenation of  $\alpha,\beta$ -unsaturated aldehydes by Pt catalysts supported on Fe-based layered double hydroxides and derived mixed metal oxides. *Catalysis Science & Technology* **2016**, *6* (3), 703-707.
22. Hamdi, J.; Diehl, B. N.; Do, J.; Trudell, M. L., Ambient Pressure Ir@Hal-Catalyzed Hydrogenation of Aryl Aldehydes, Ketones, and Phenol. *The Journal of Organic Chemistry* **2023**, *88* (13), 9388-9394.
23. Chen, F.; Topf, C.; Radnik, J.; Kreyenschulte, C.; Lund, H.; Schneider, M.; Surkus, A.-E.; He, L.; Junge, K.; Beller, M., Stable and Inert Cobalt Catalysts for Highly Selective and Practical Hydrogenation of C $\equiv$ N and C=O Bonds. *Journal of the American Chemical Society* **2016**, *138* (28), 8781-8788.
24. Amneal Pharmaceuticals Company GmbH, *Process for the perparation of eslicarbazepine acetate*, India patent No. IN2015MU03201 A, **2017**.
25. Manjunath, D. M.; Sharanappa, T. N.; Shivamurti, A. C., Spectroscopic Investigation and Reactivities of Ruthenium(III) Catalyzed Oxidation of Anticholinergic Drug Atropine Sulfate Monohydrate by Hexacyanoferrate(III) in Aqueous Alkaline Media: A Mechanistic Approach. *Synthesis and Reactivity in Inorganic, Metal-Organic, and Nano-Metal Chemistry* **2014**, *44* (2), 263-272.
26. Upendra, S.; Neeraj, K.; Praveen, K. V.; Vishal, K.; Bikram, S., Zinc phthalocyanine with PEG-400 as a recyclable catalytic system for selective reduction of aromatic nitro compounds. *Green Chemistry* **2012**, *14* (8), 2089-2090.

## 6. NMR Spectra

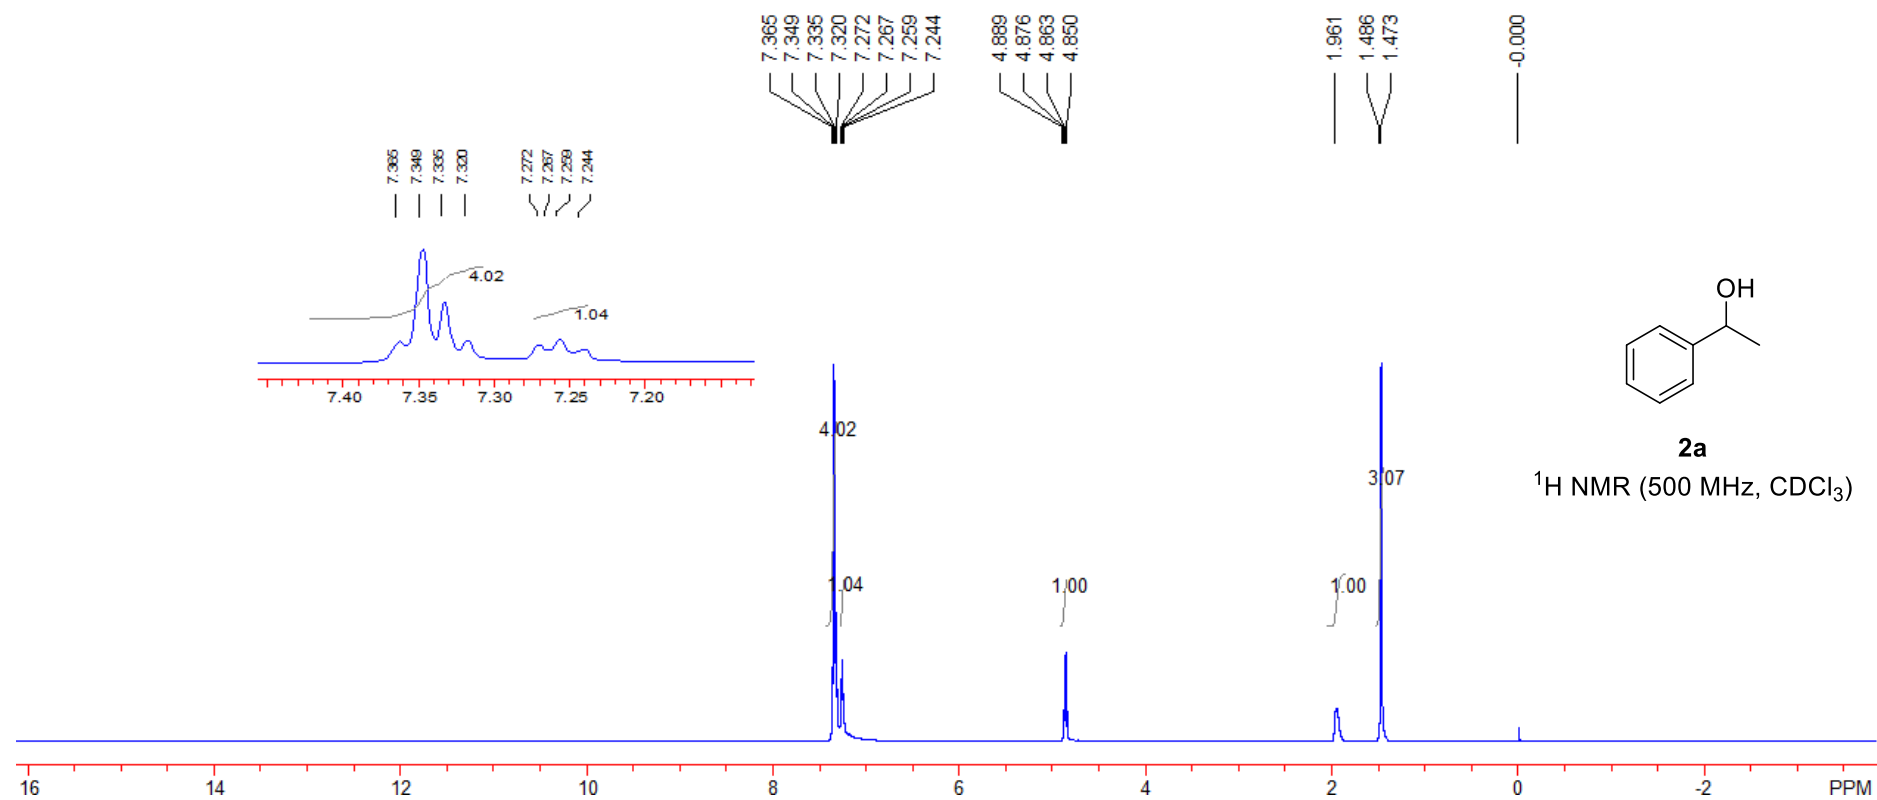

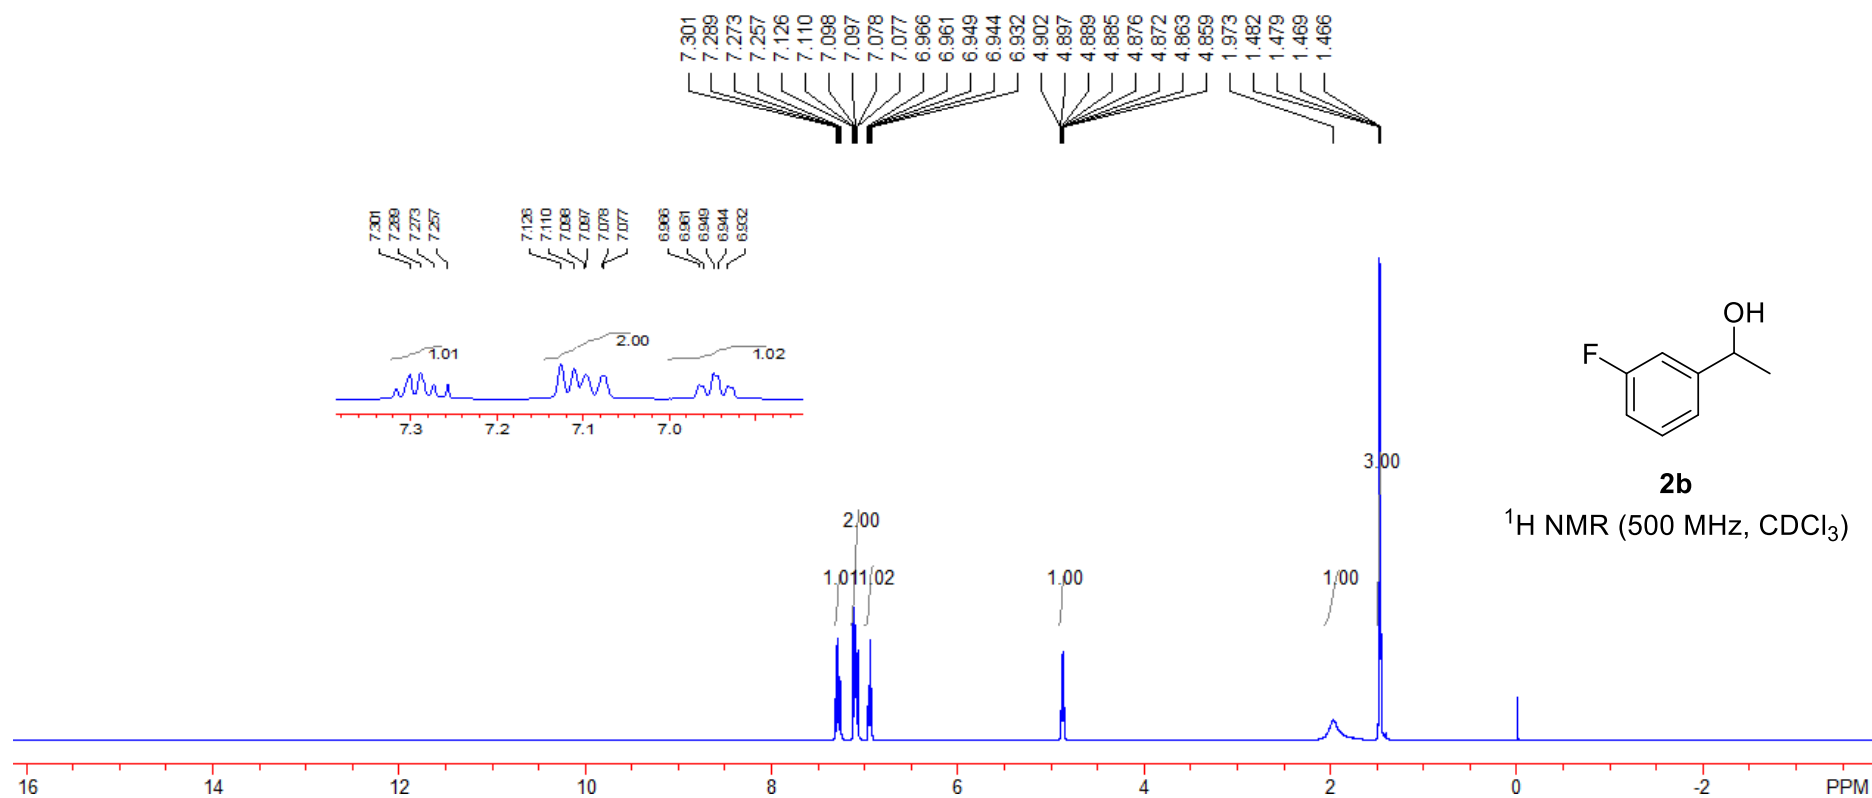

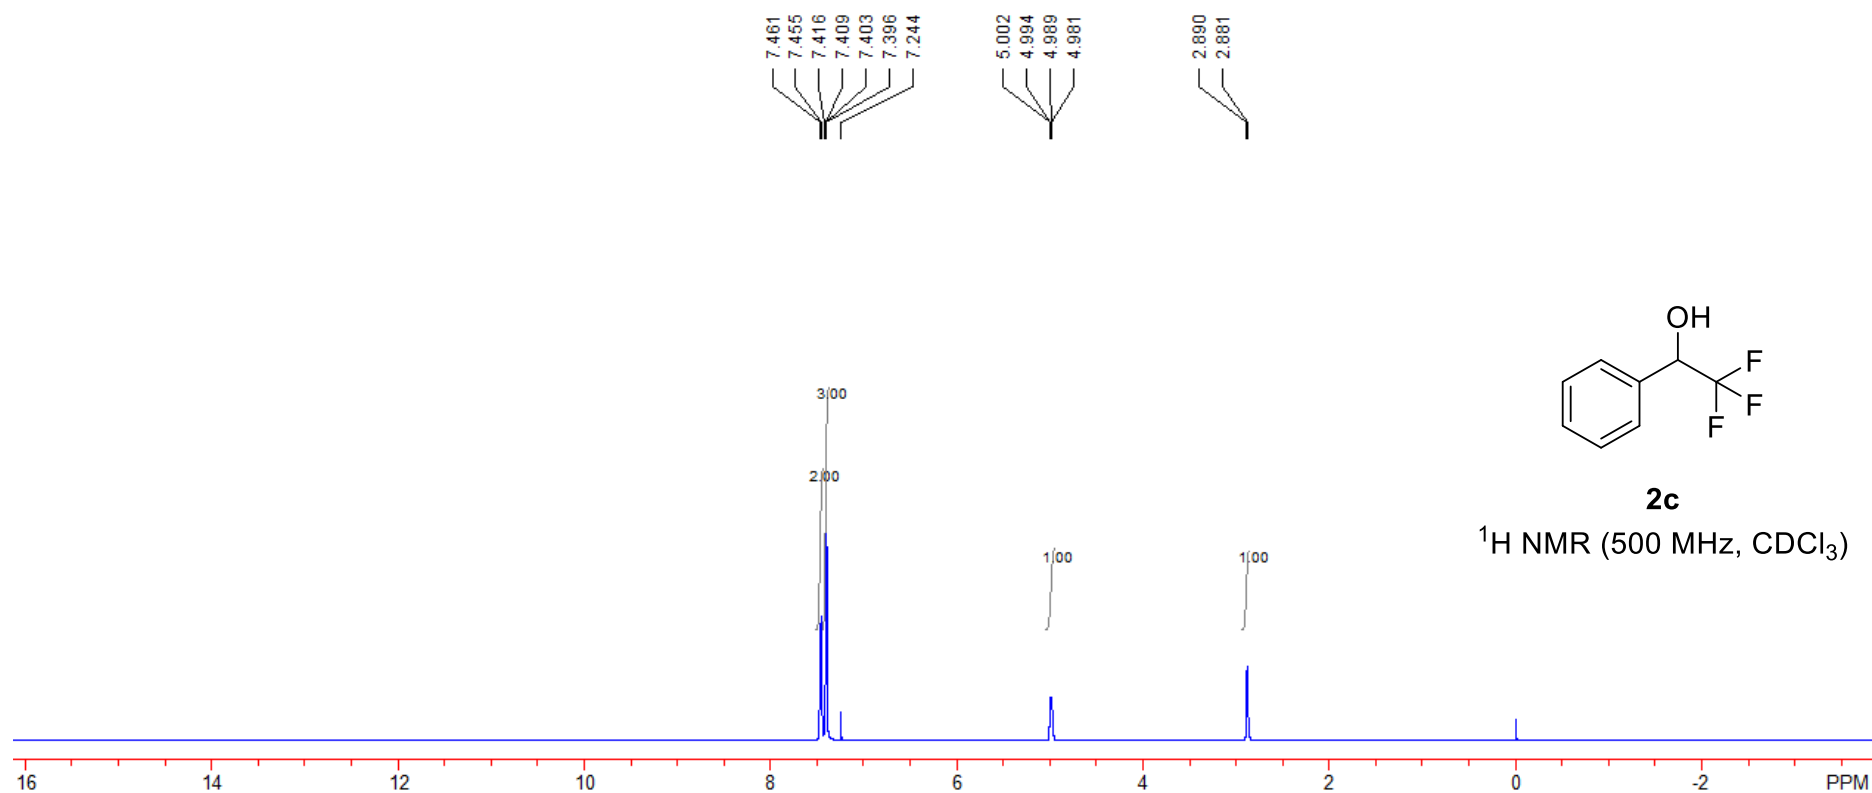

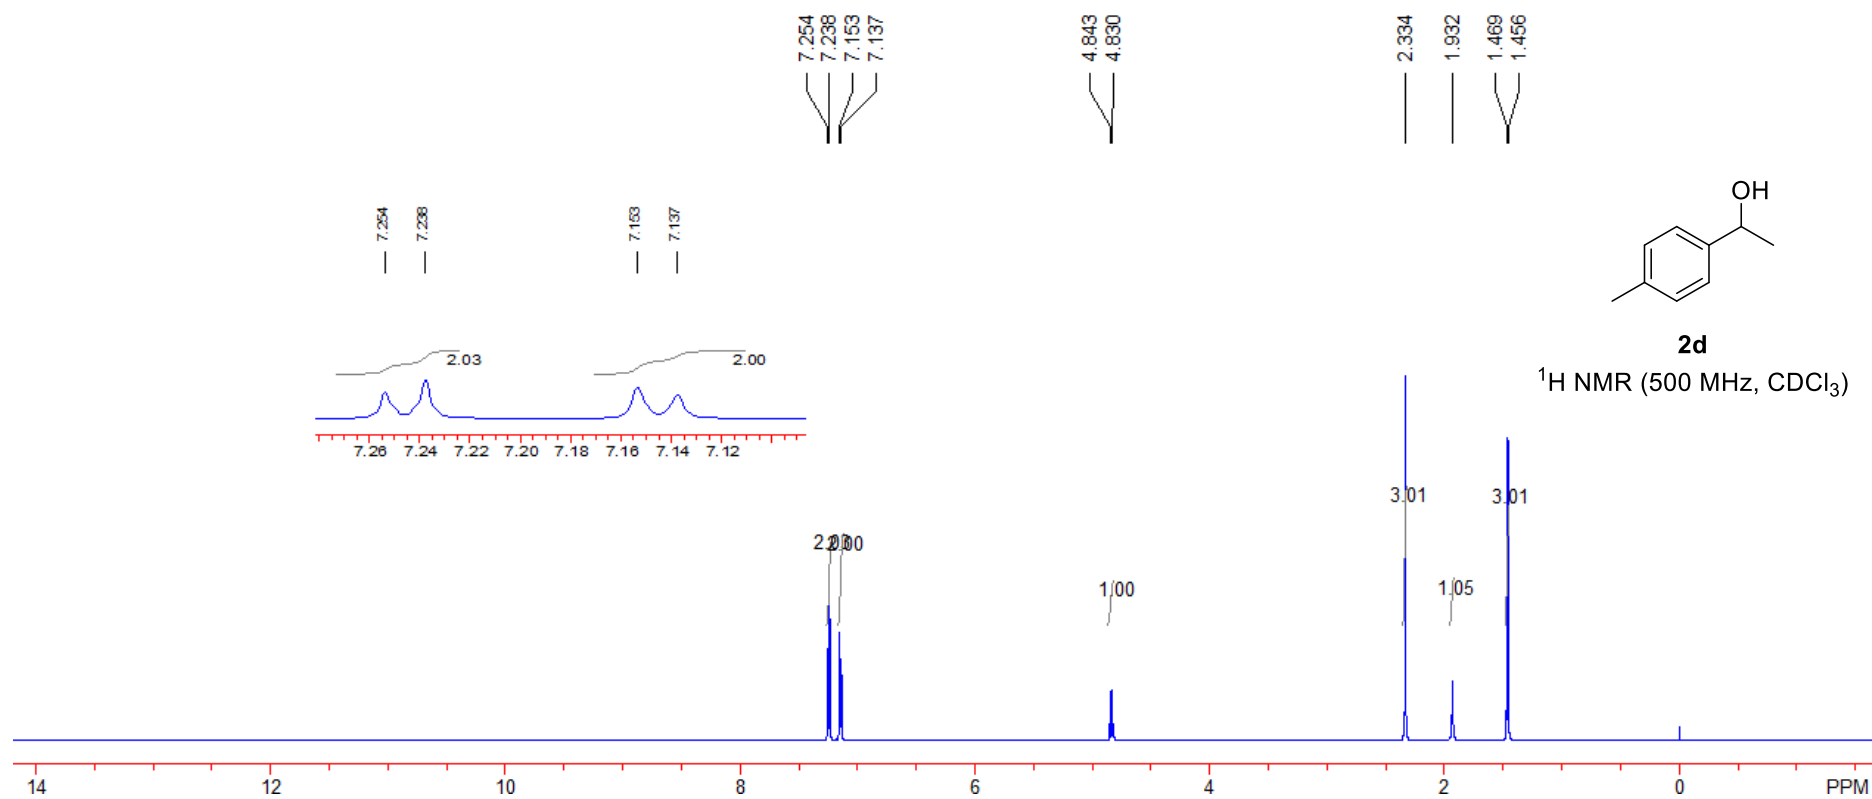

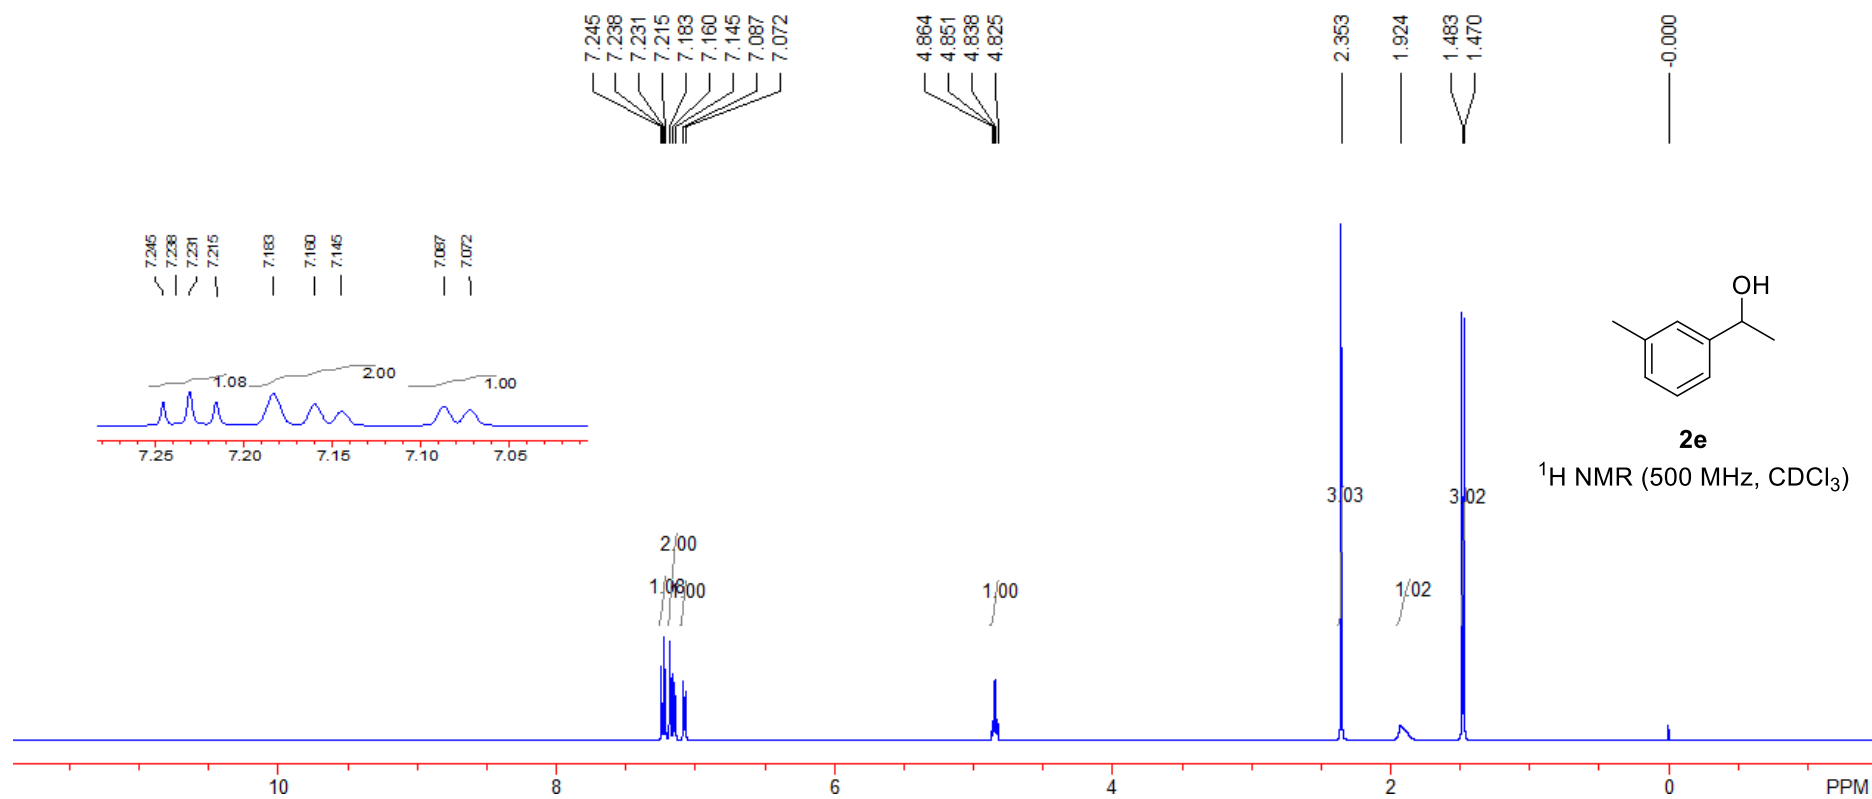

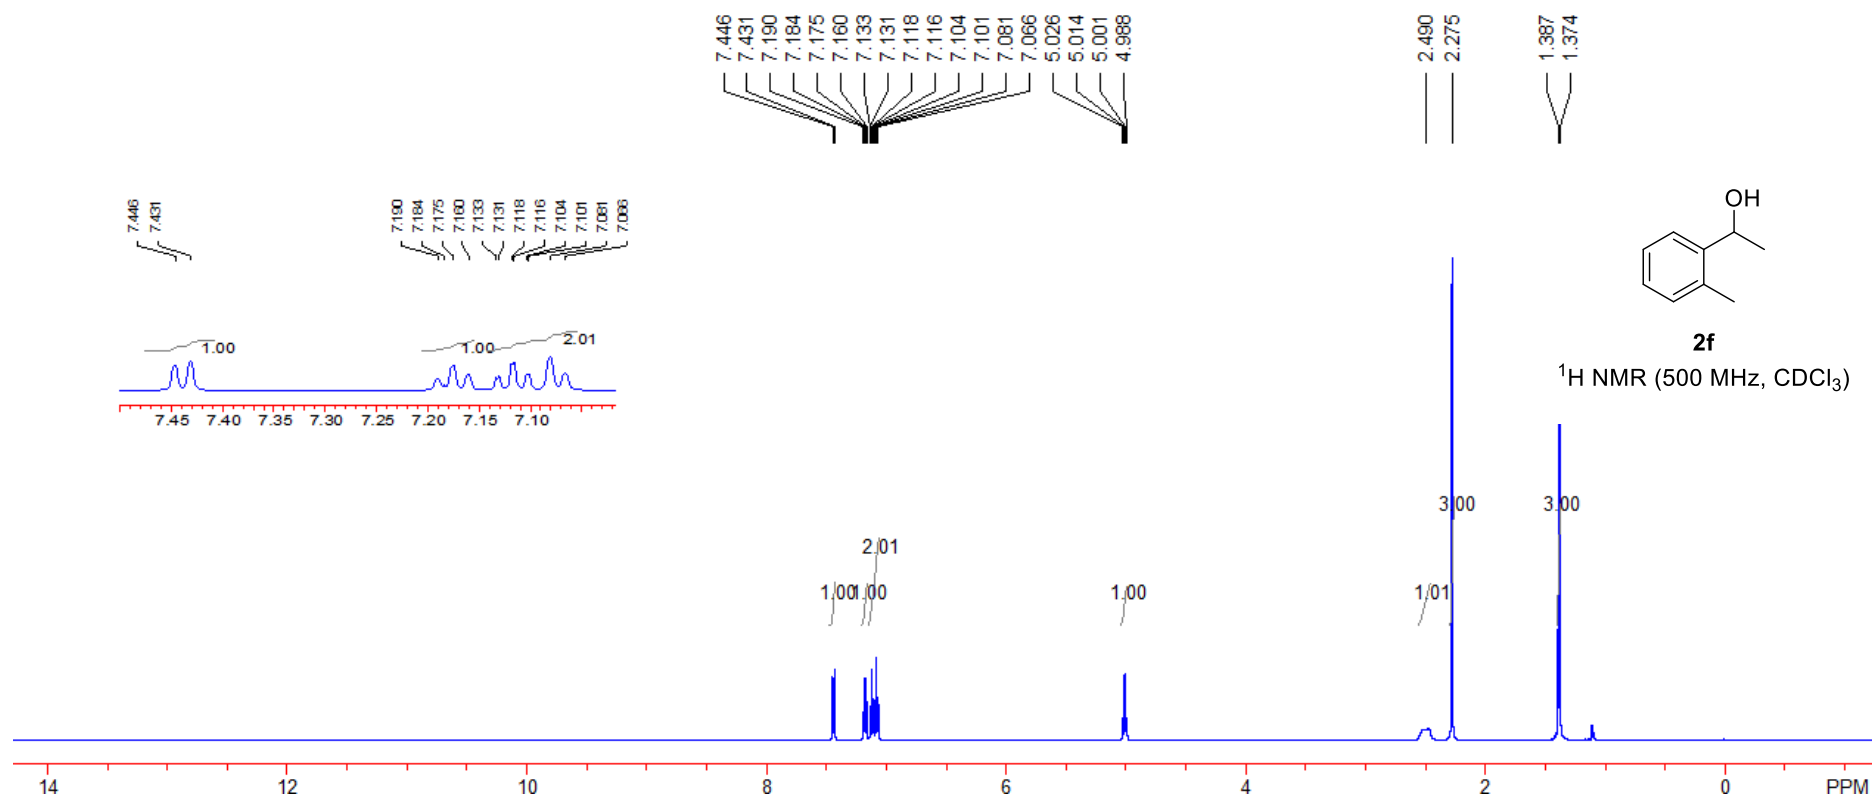

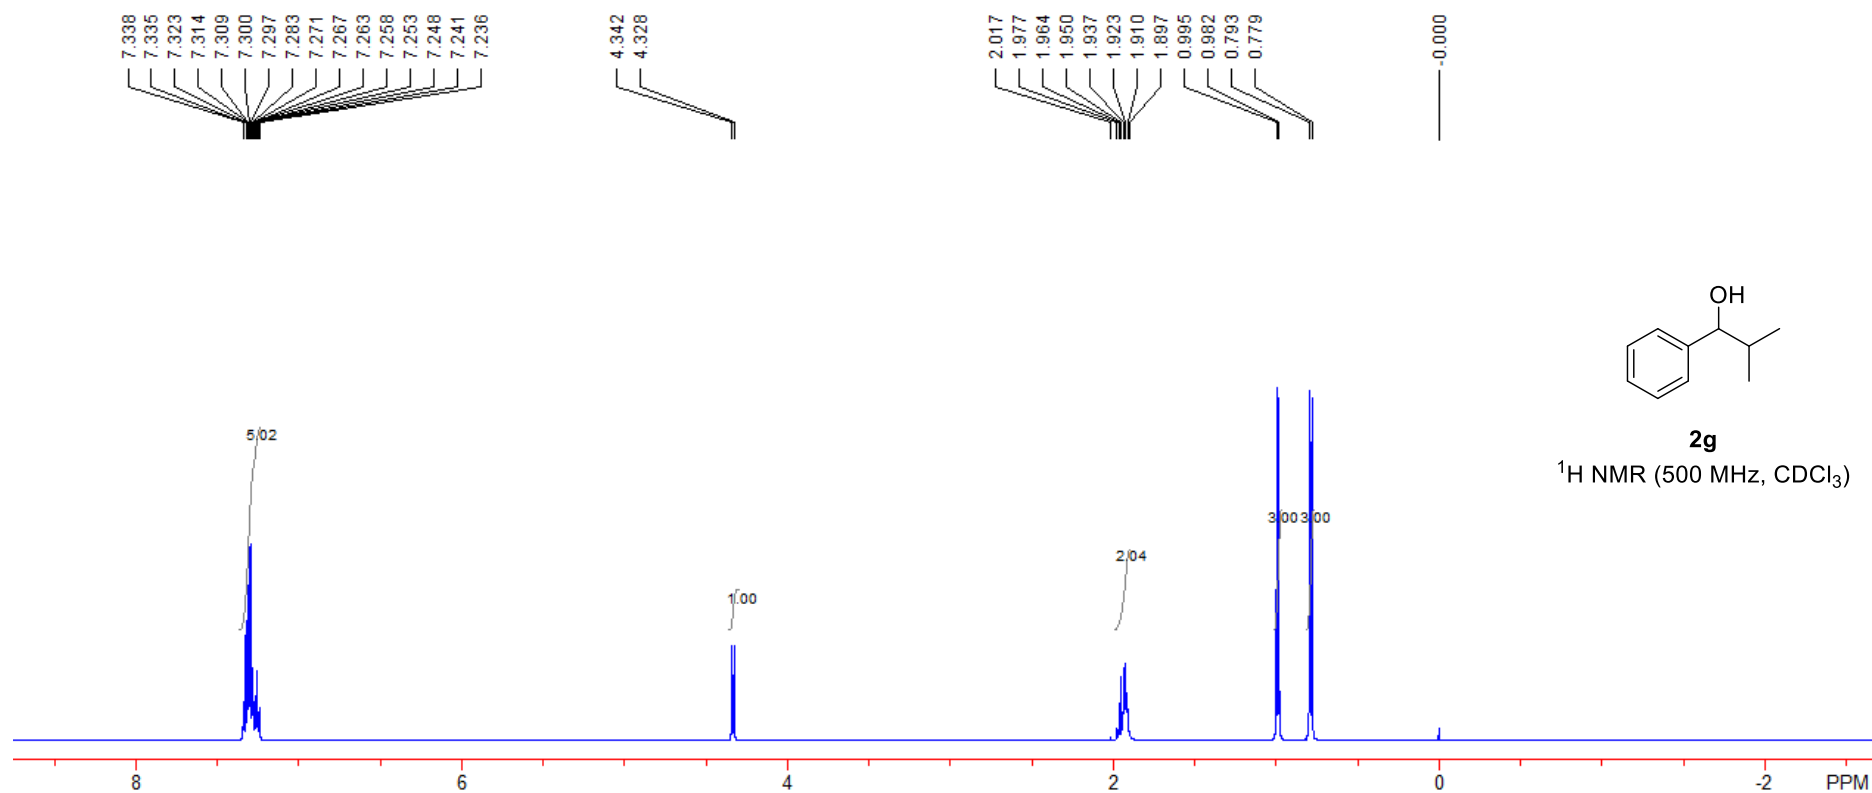

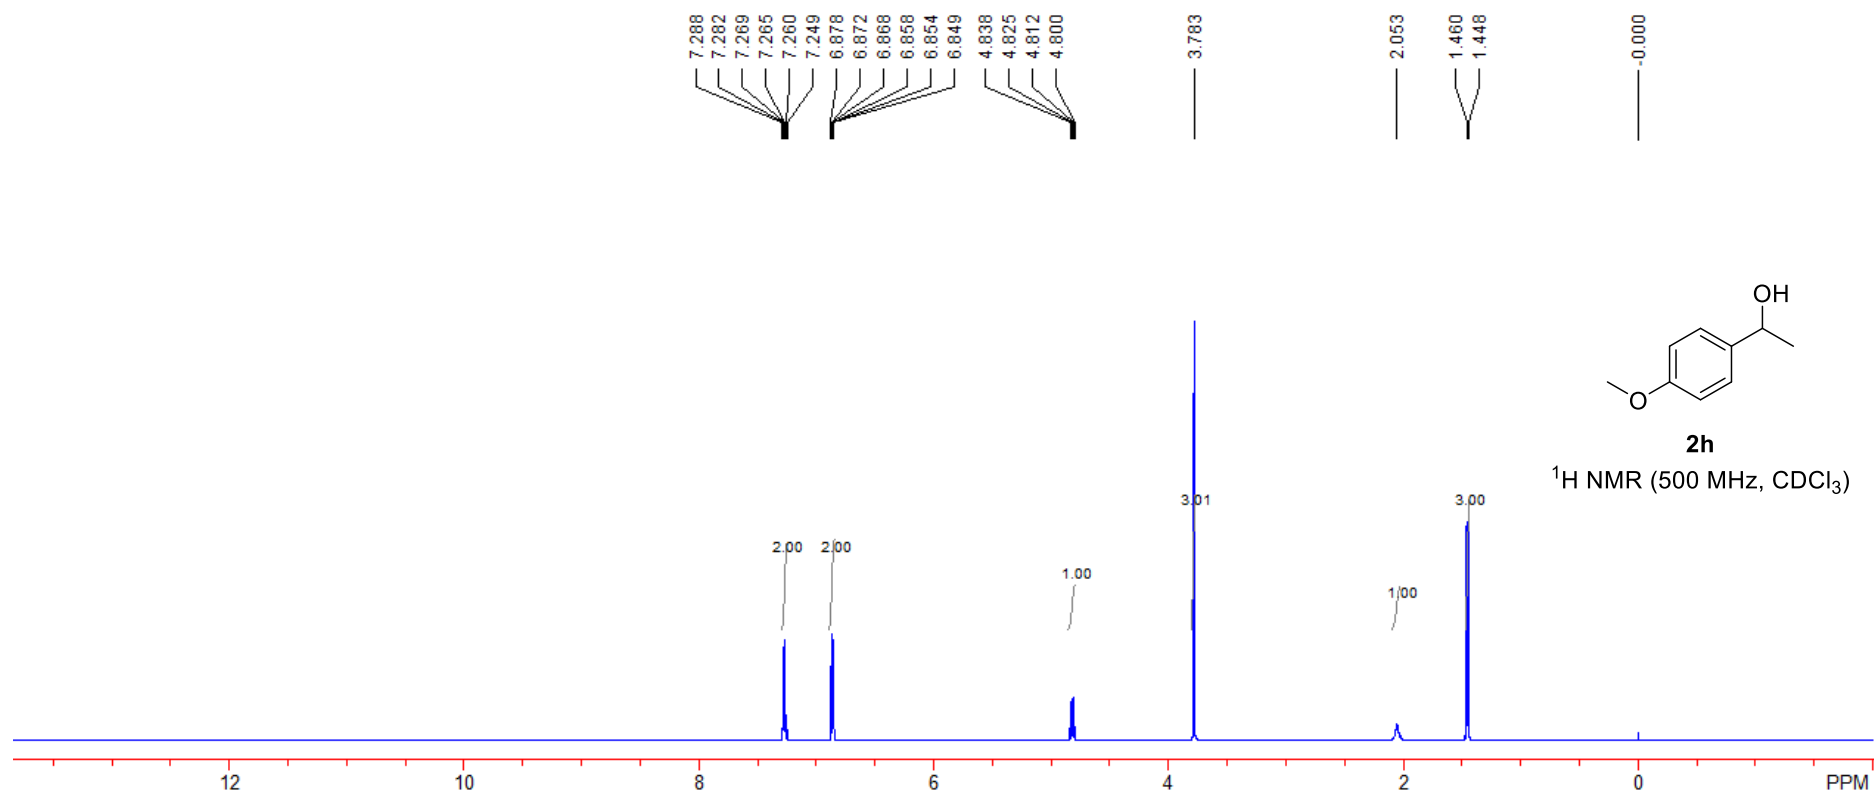

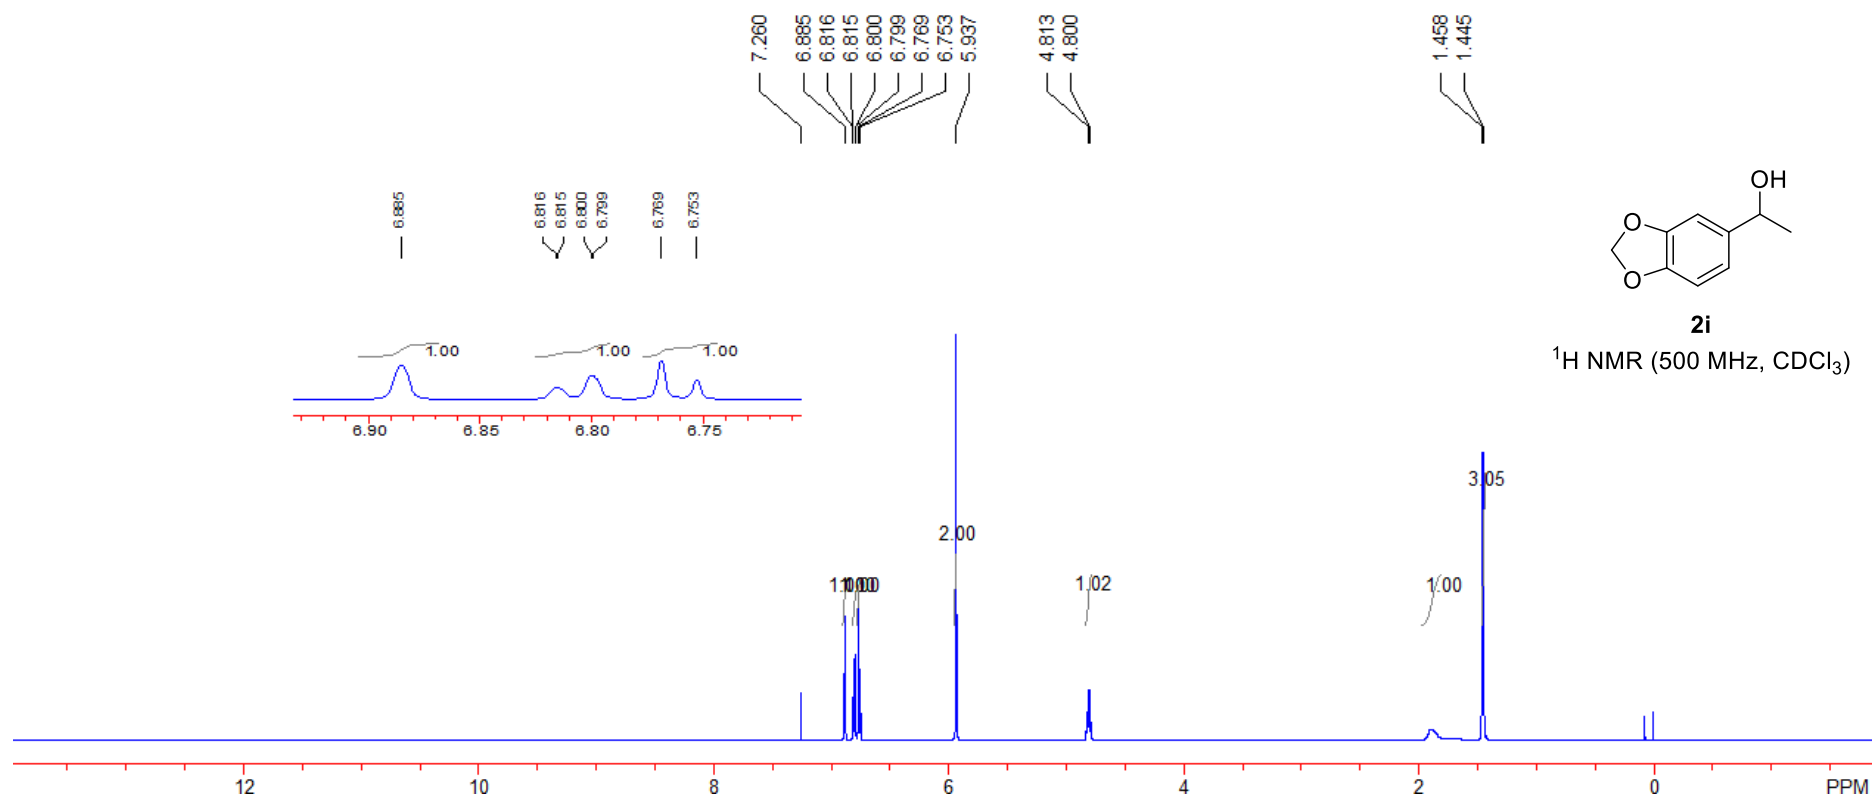

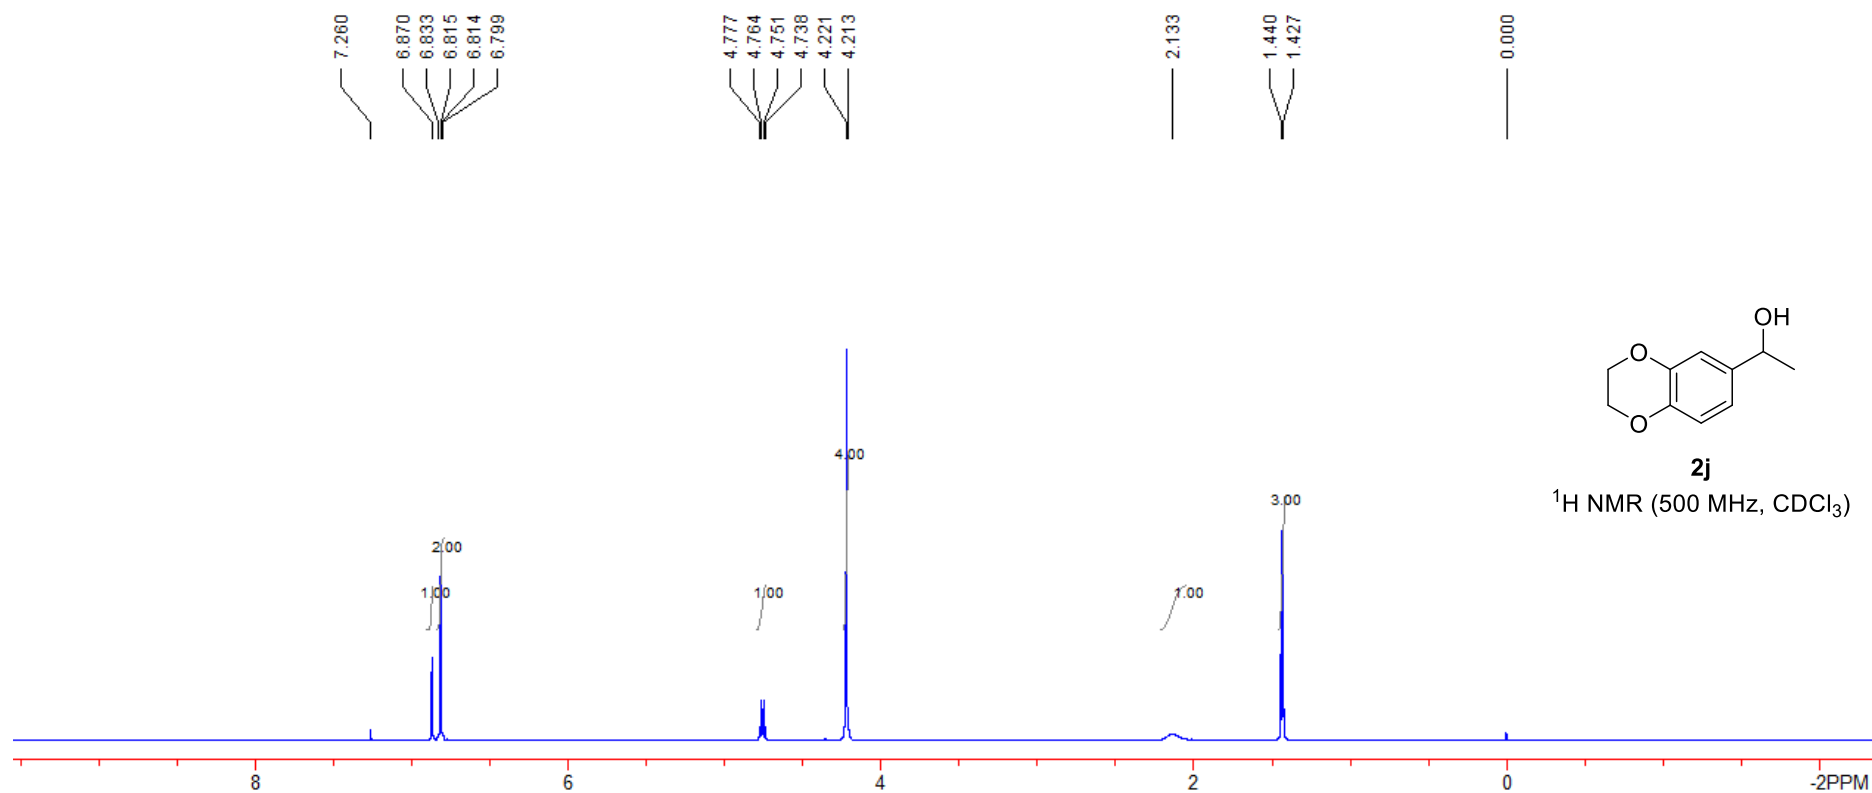

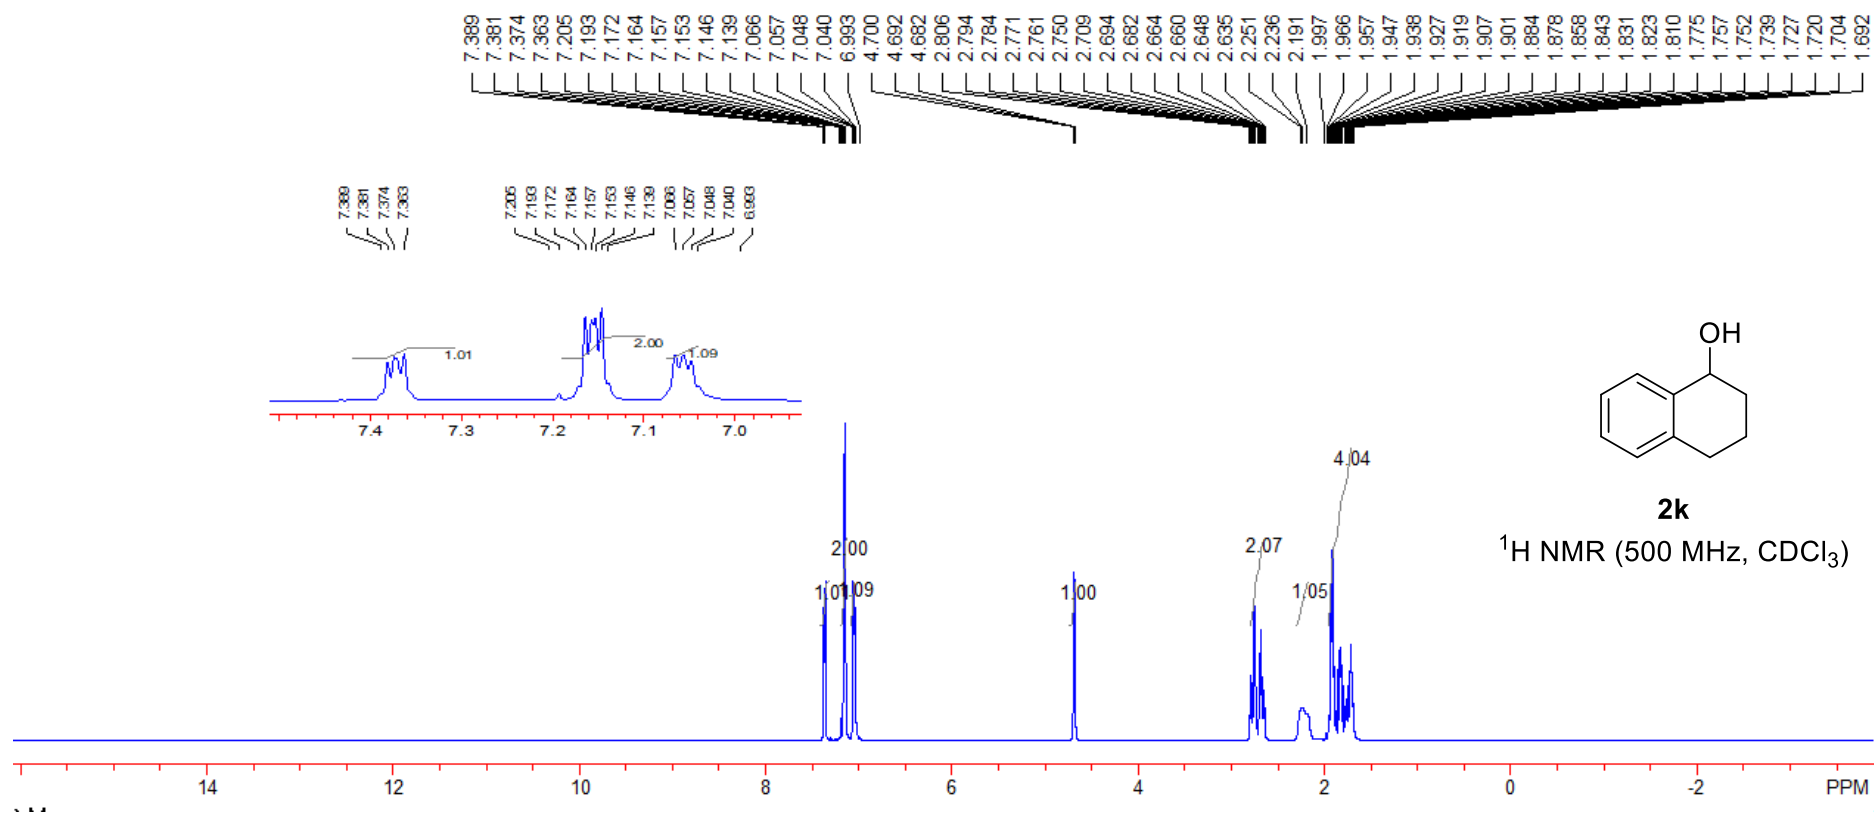

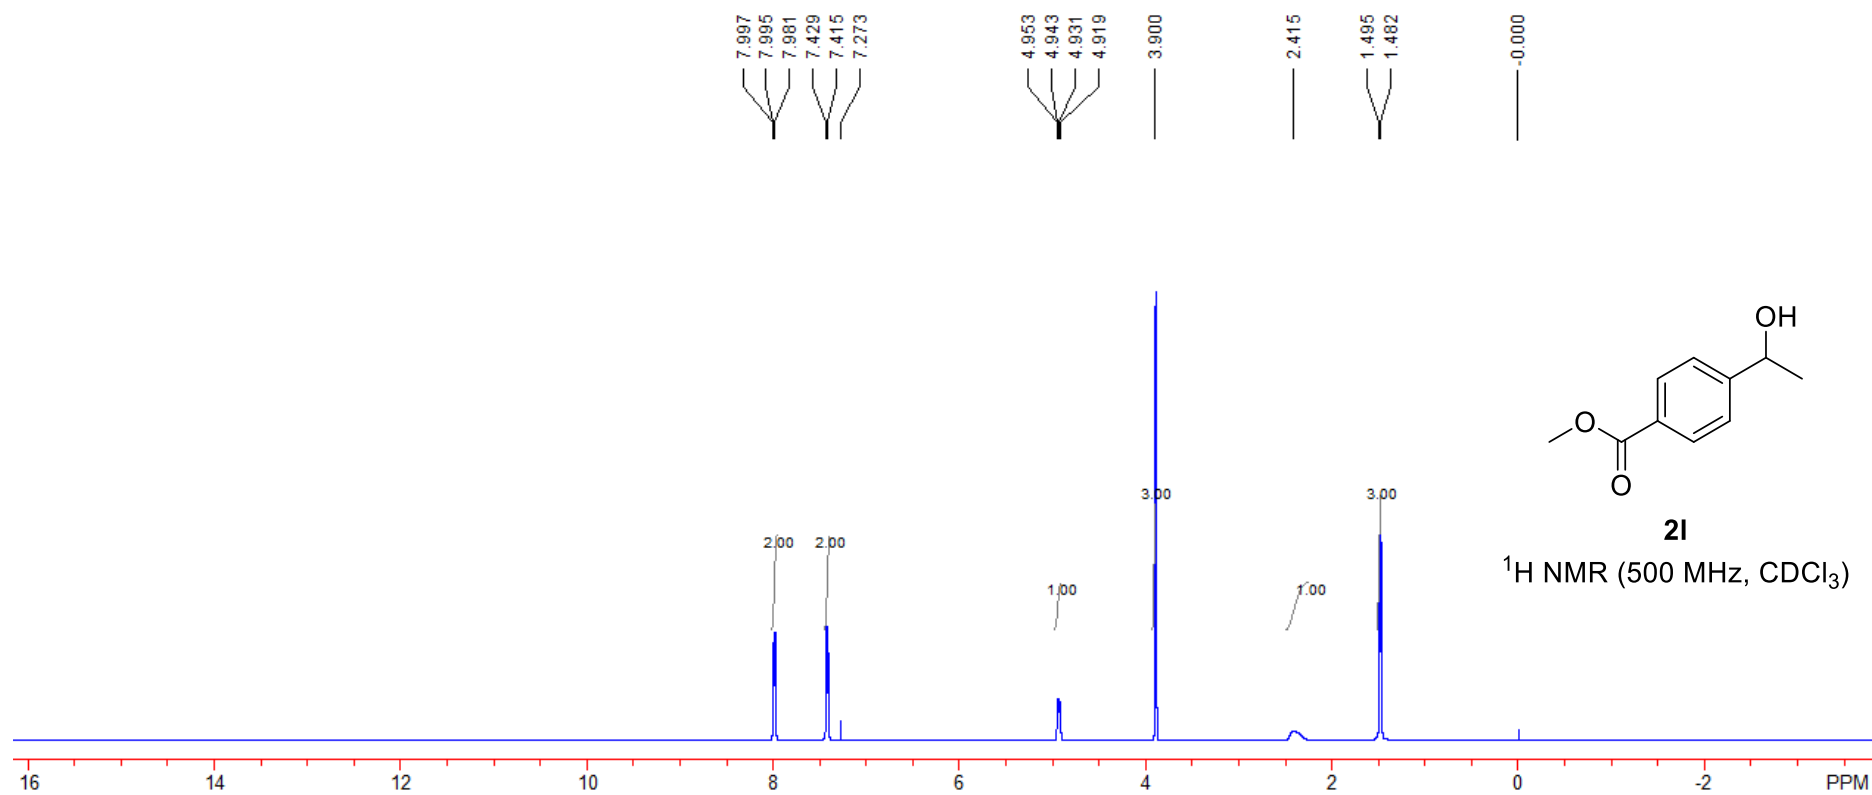

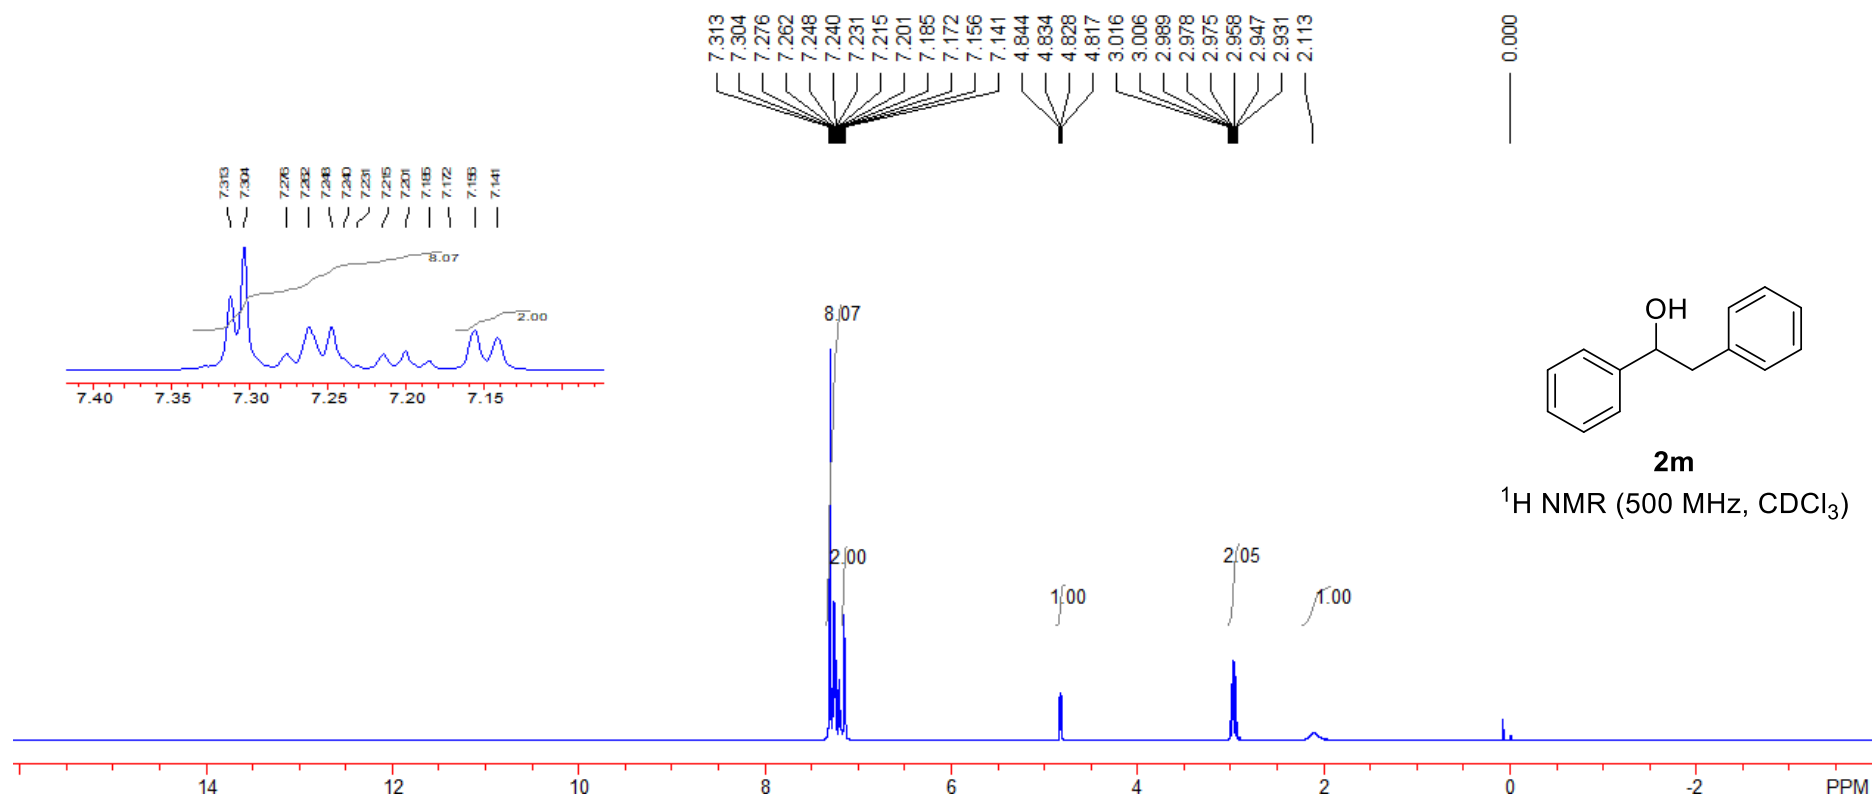

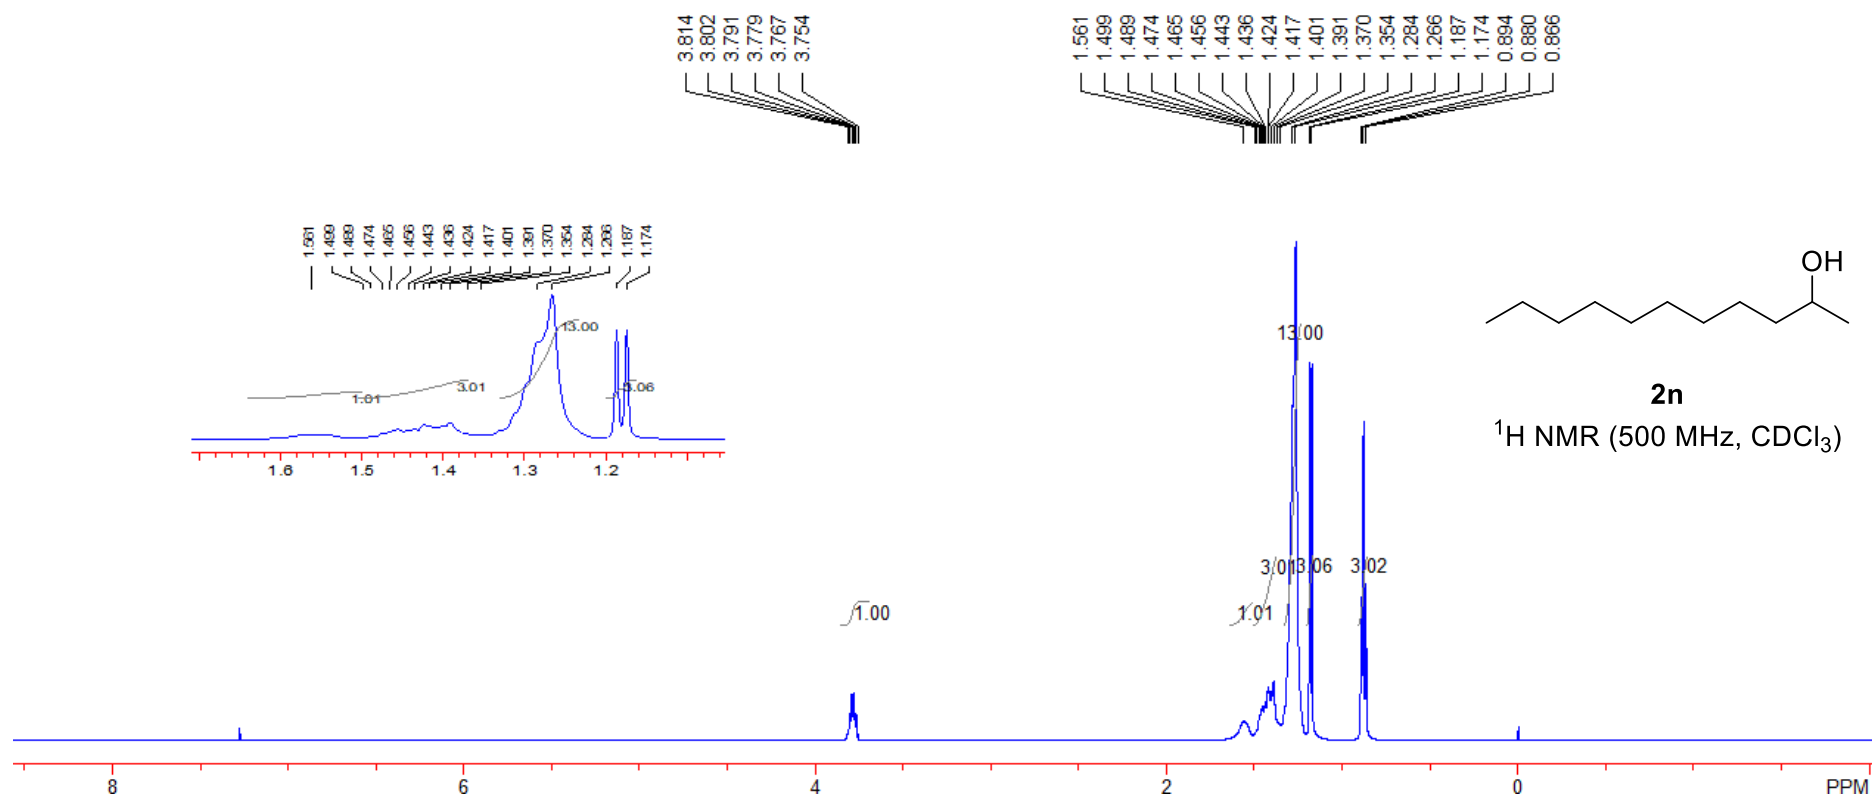

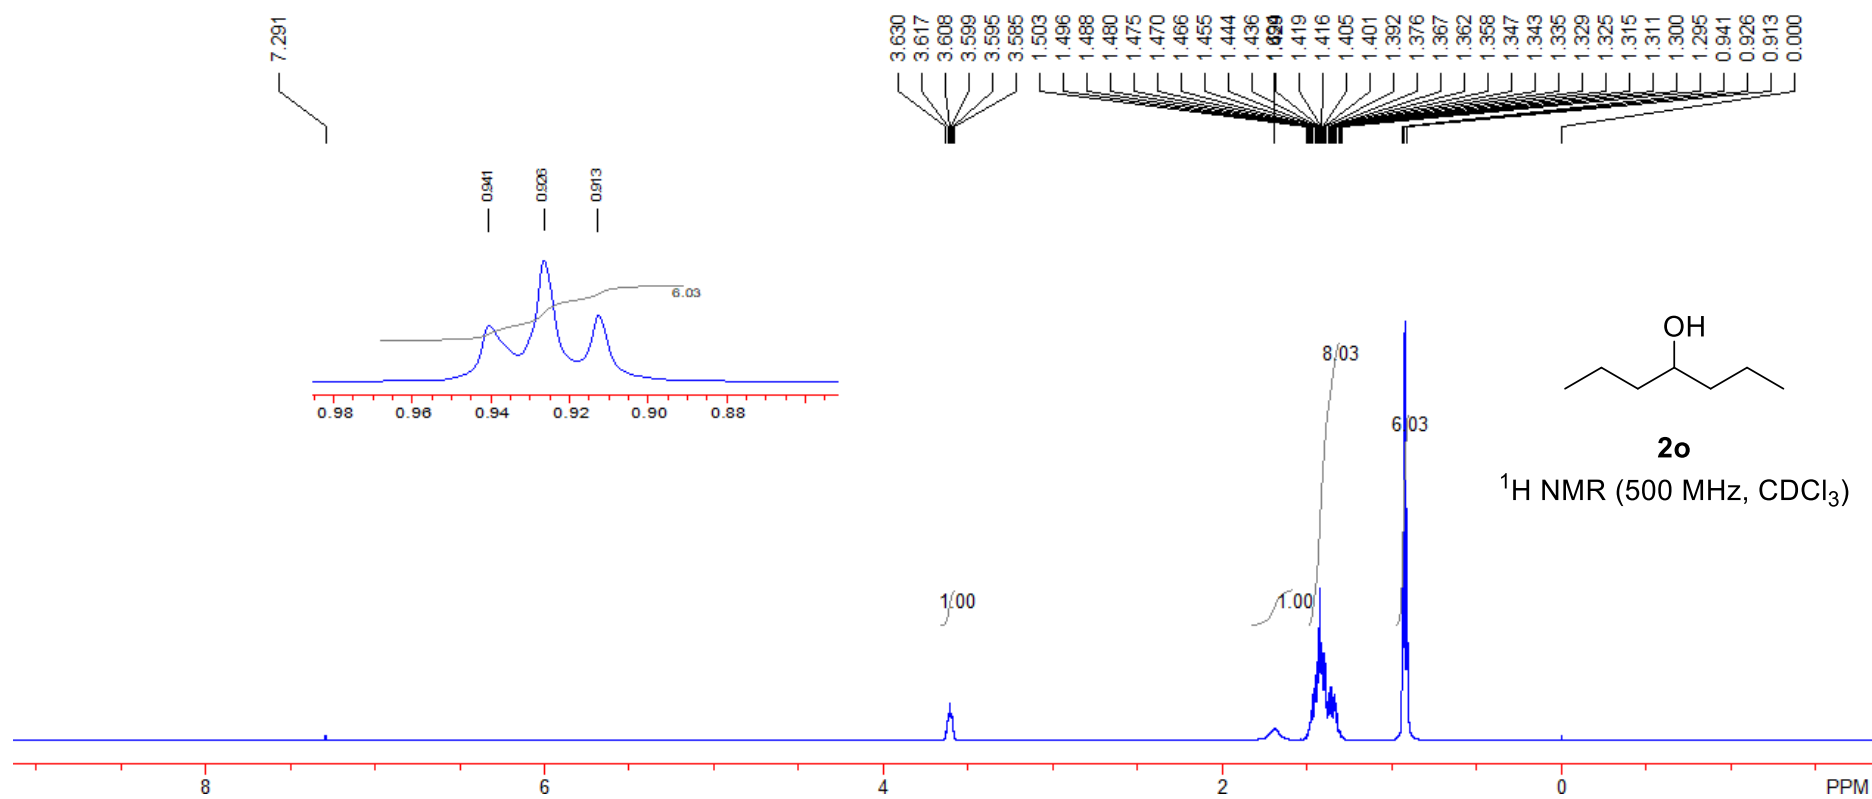

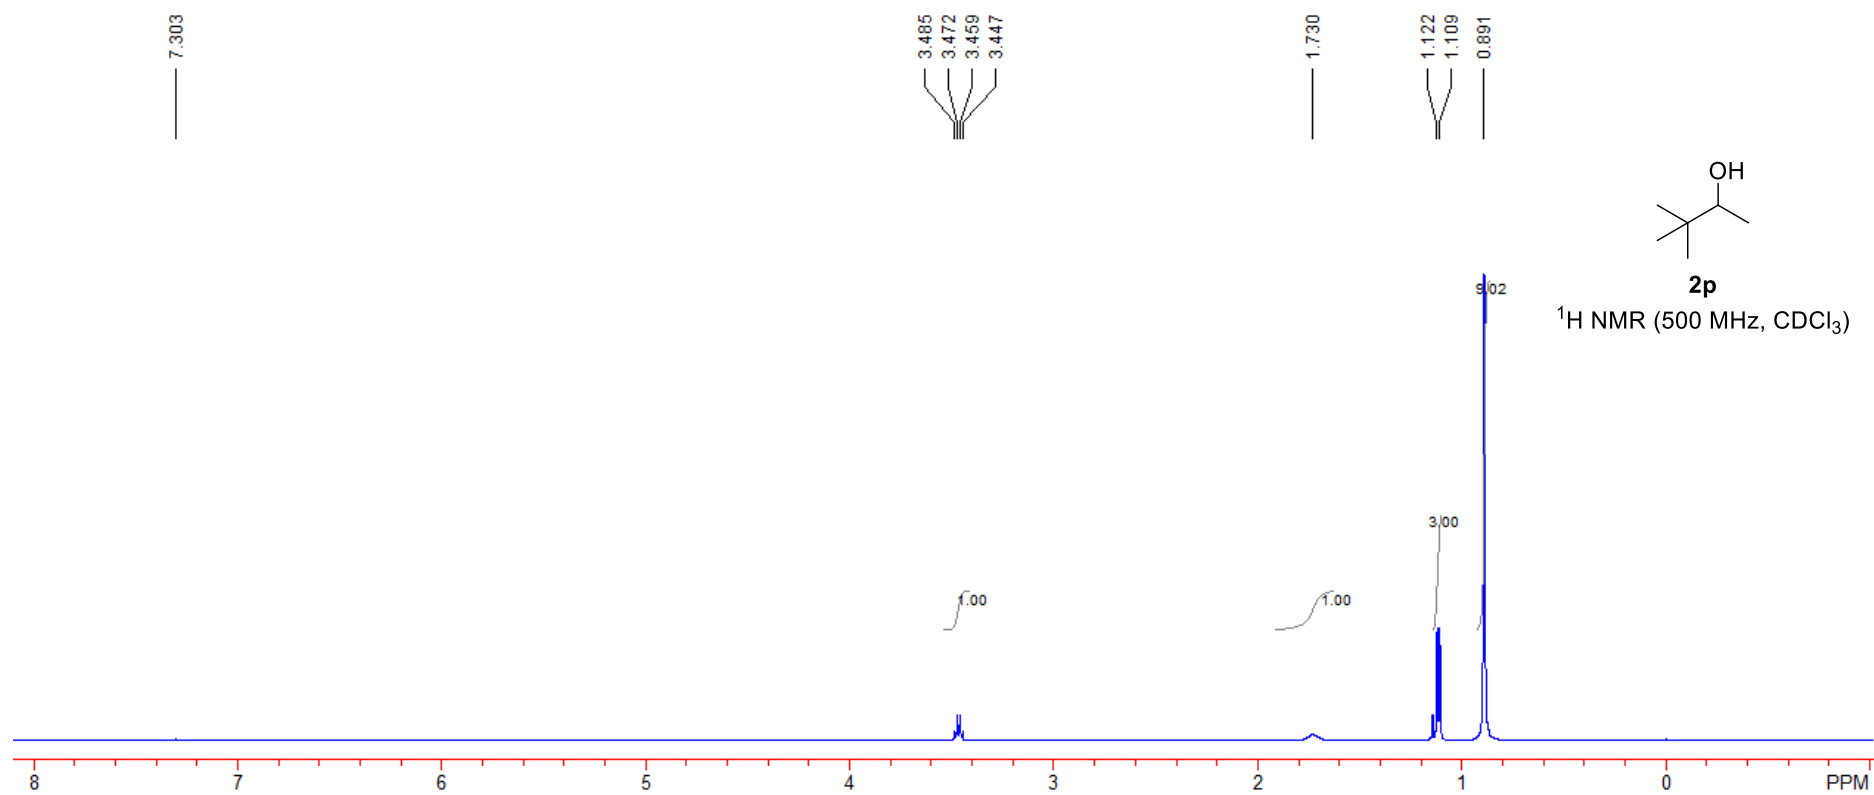

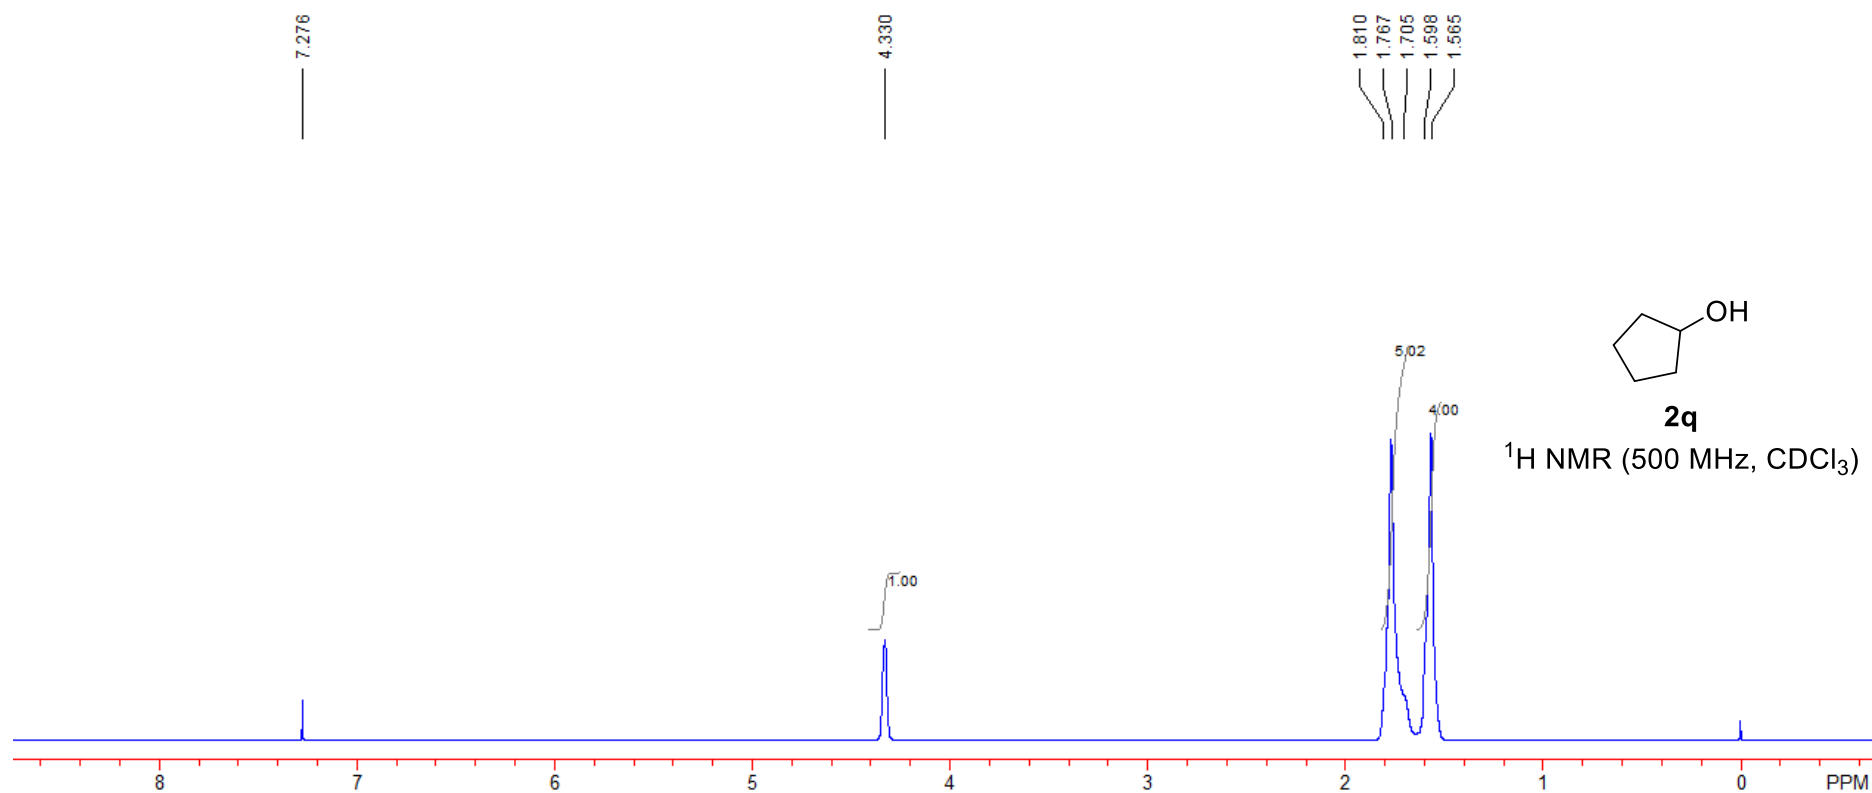

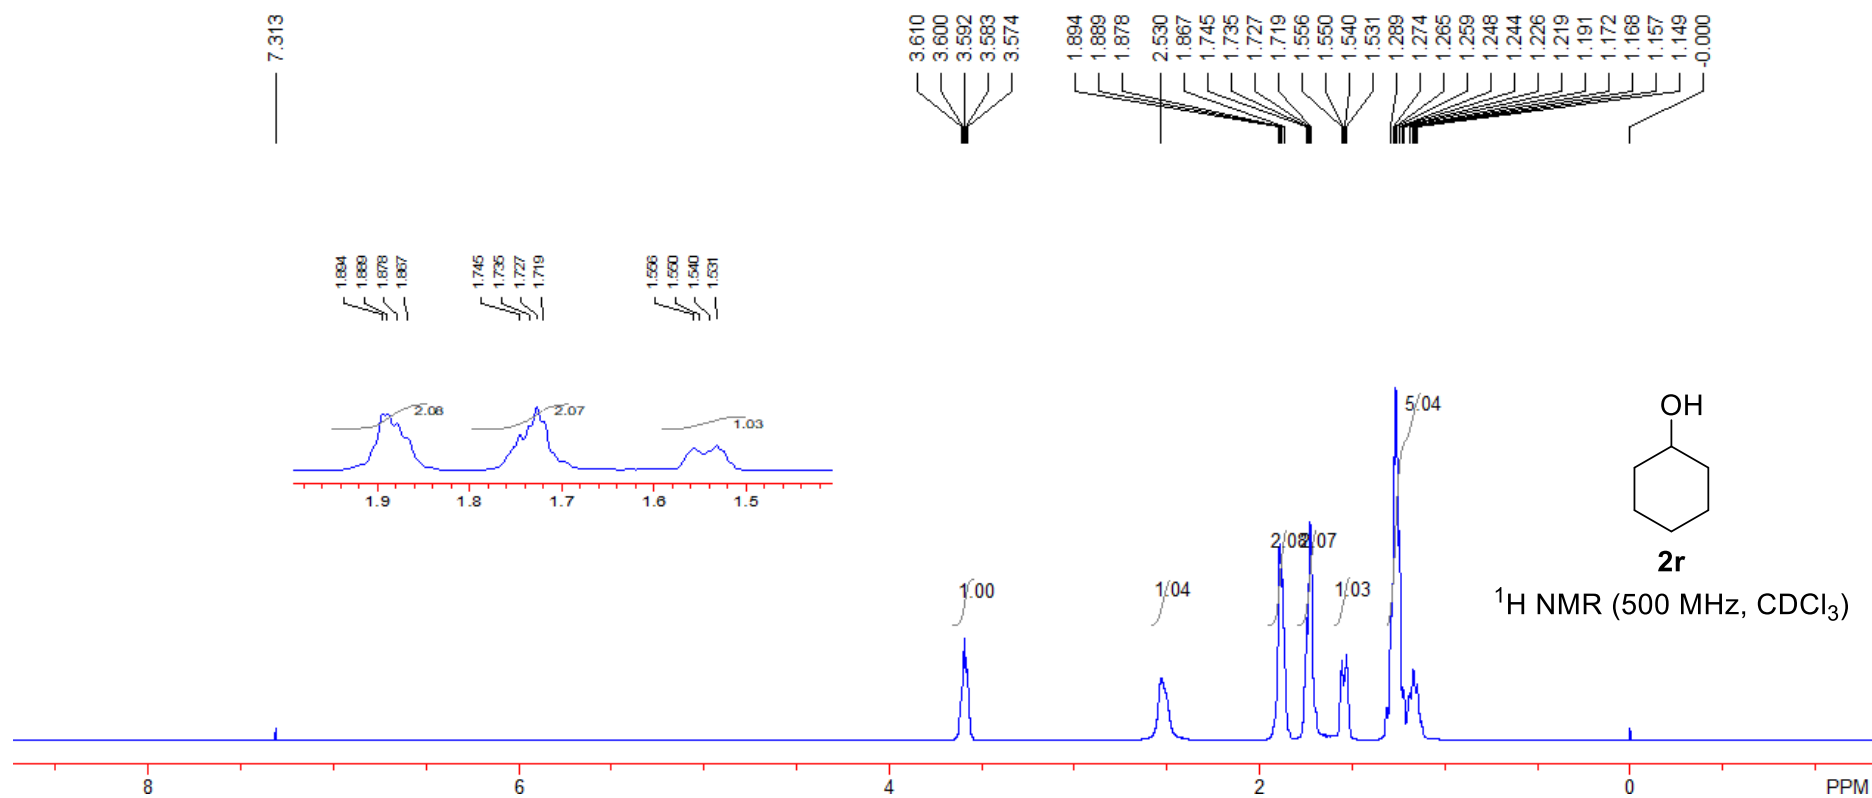

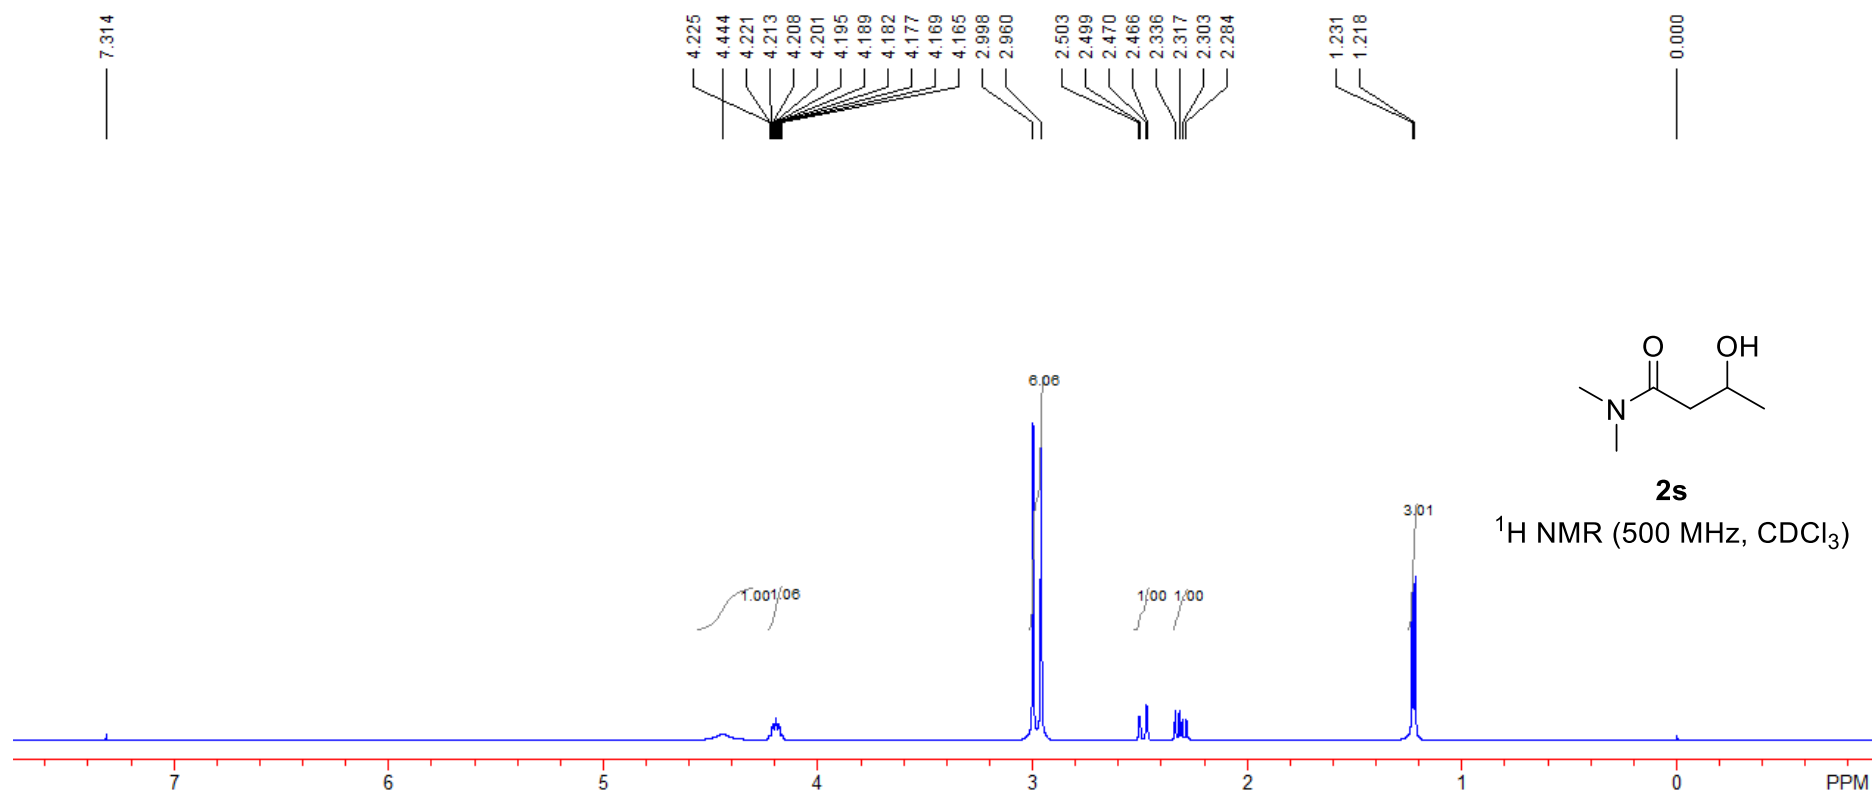

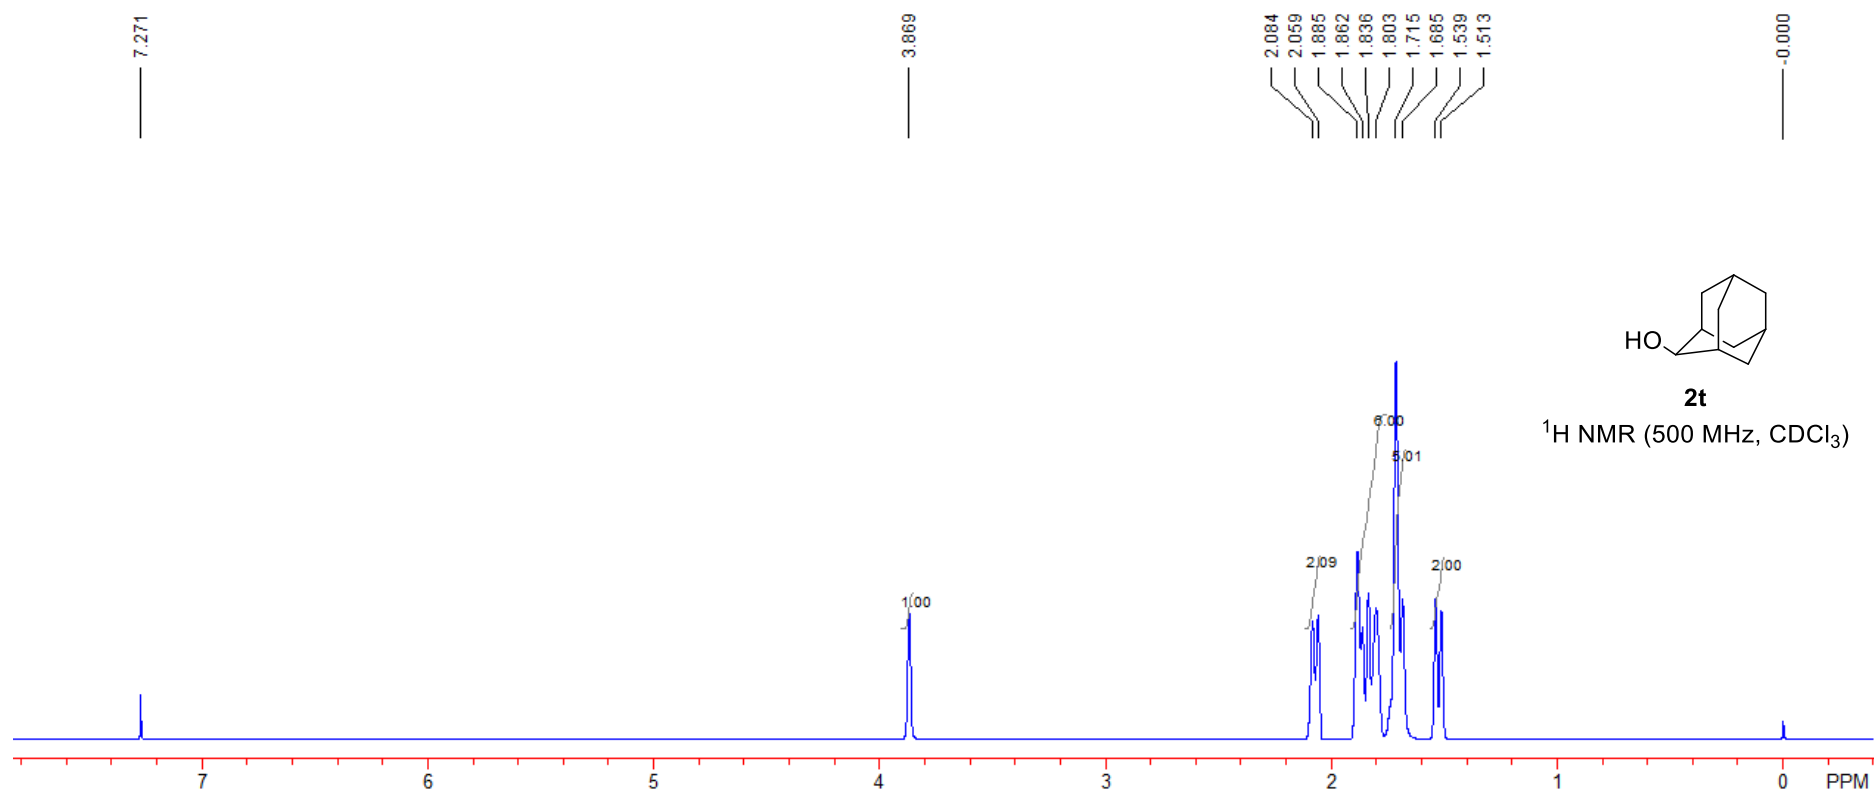

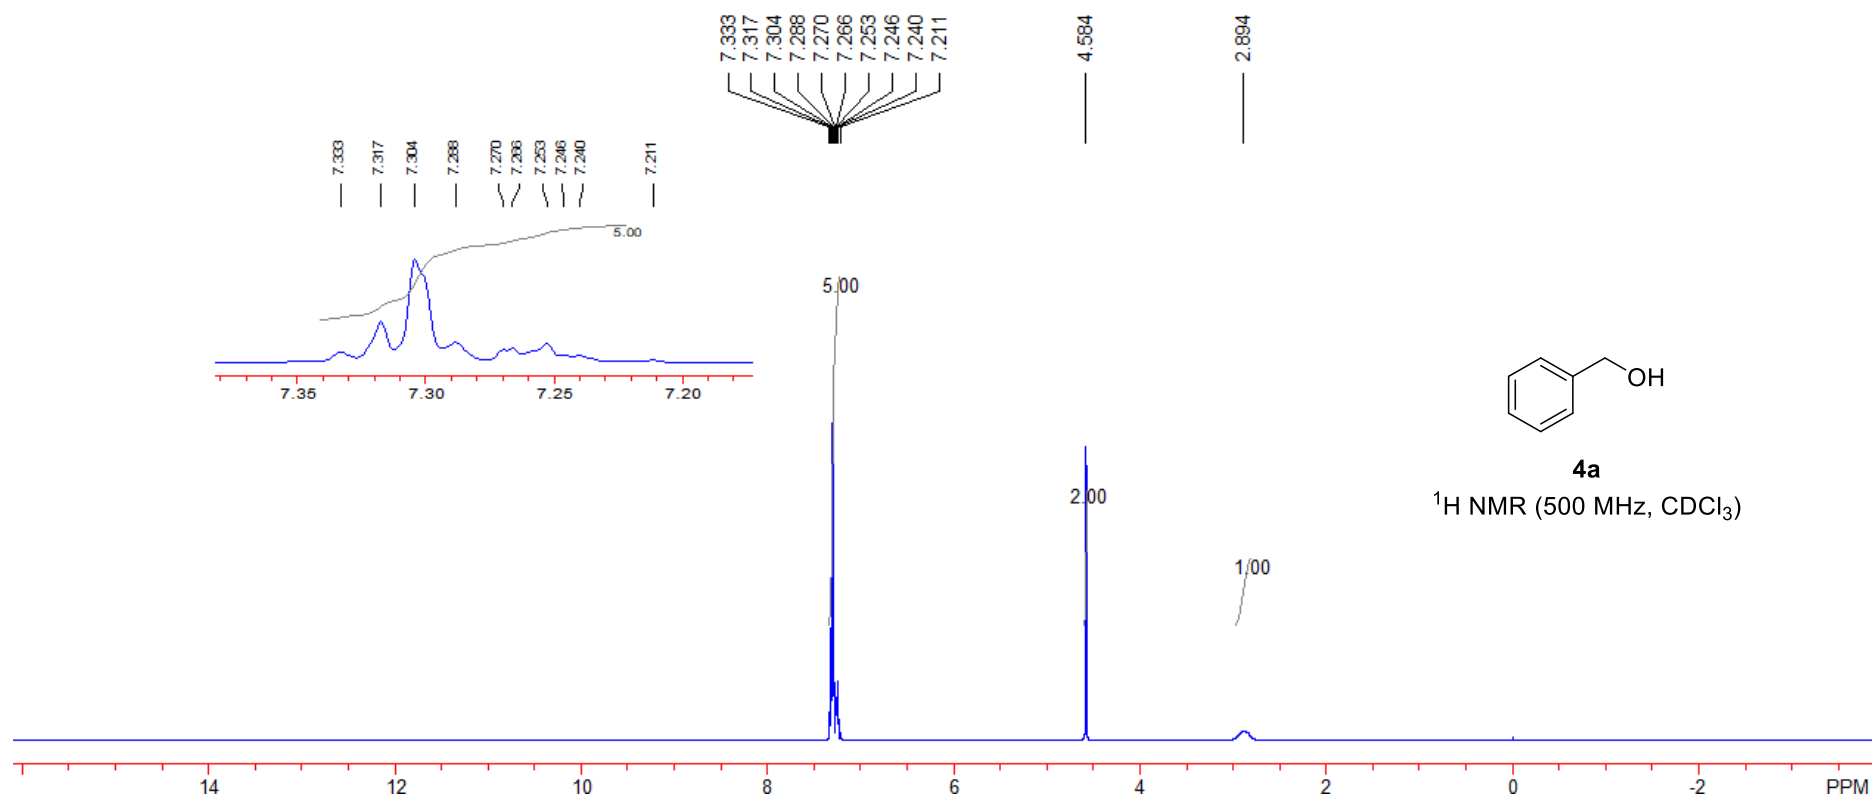

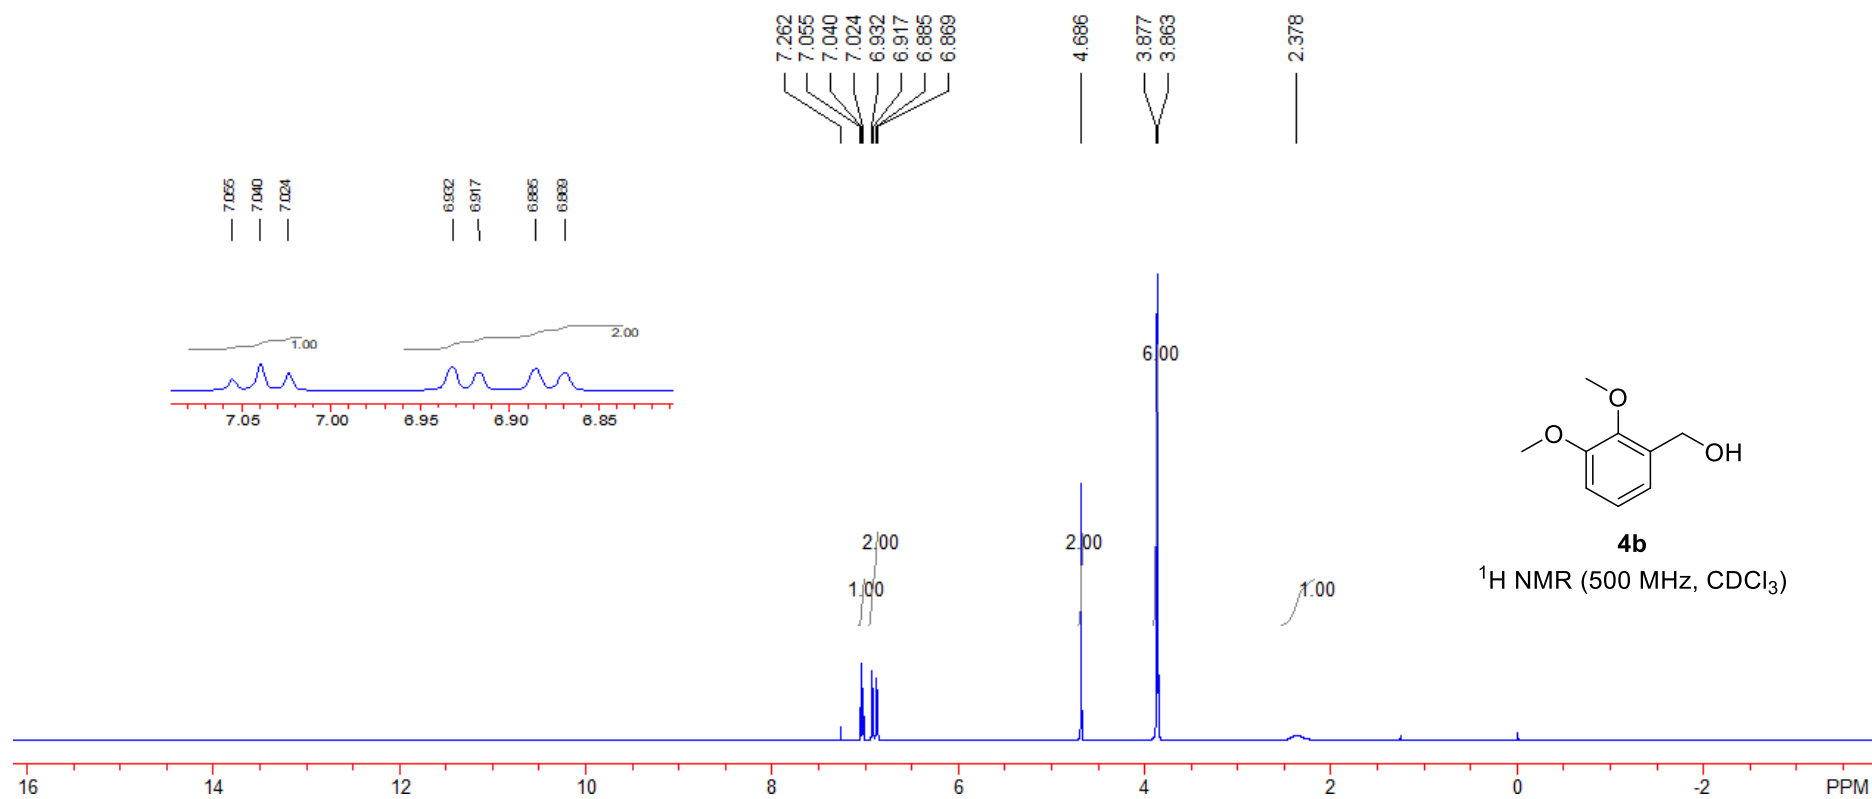

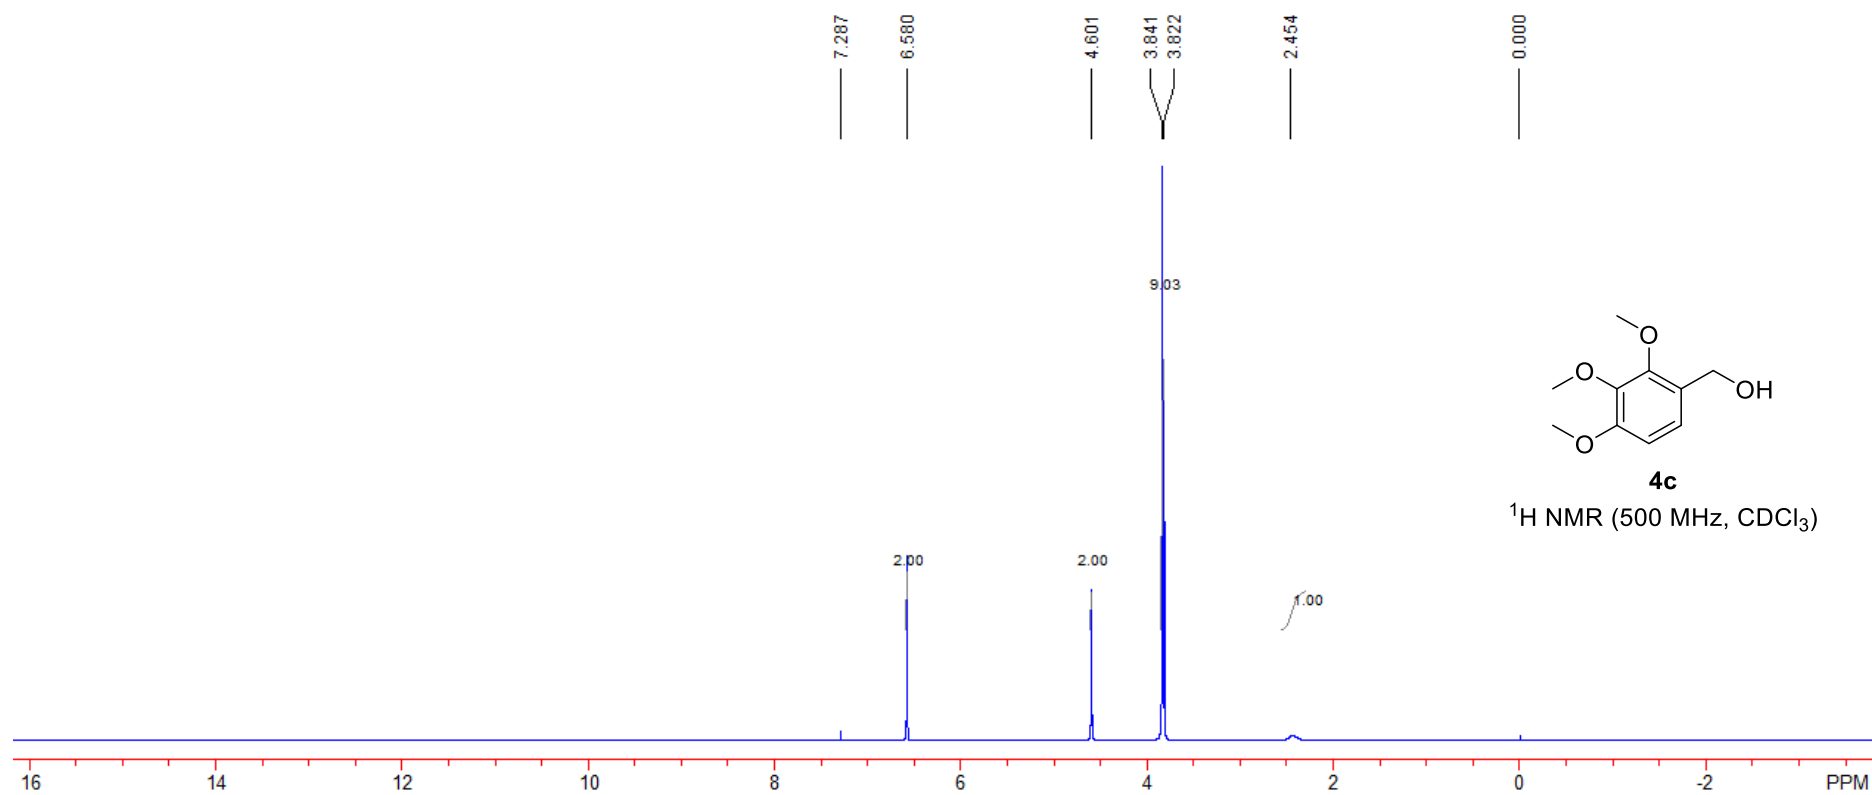

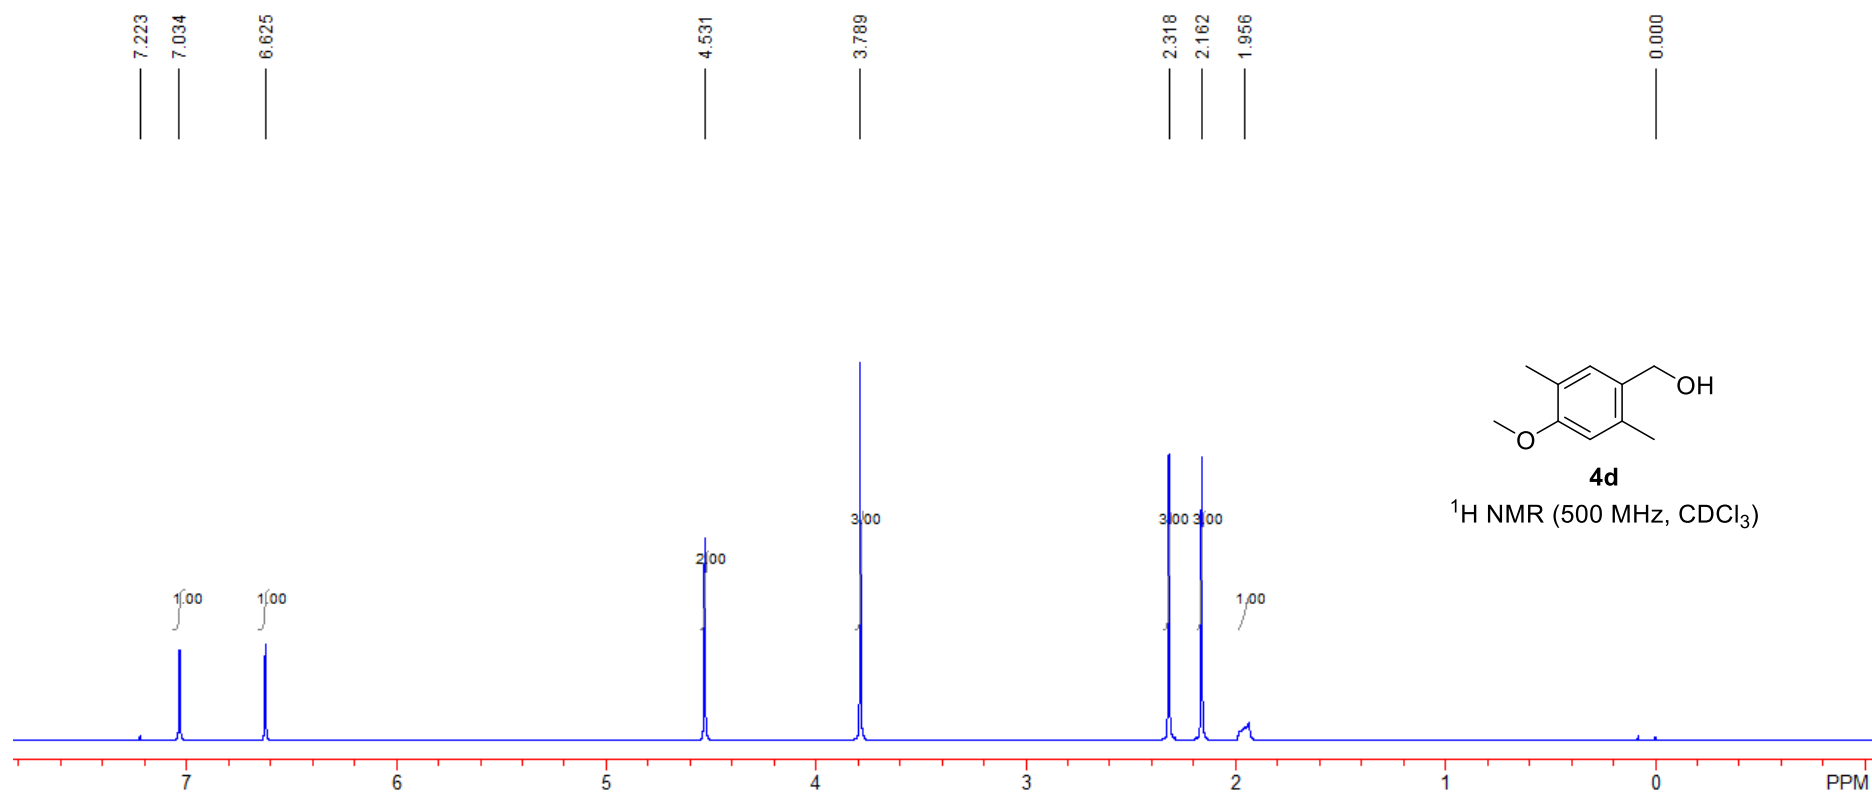

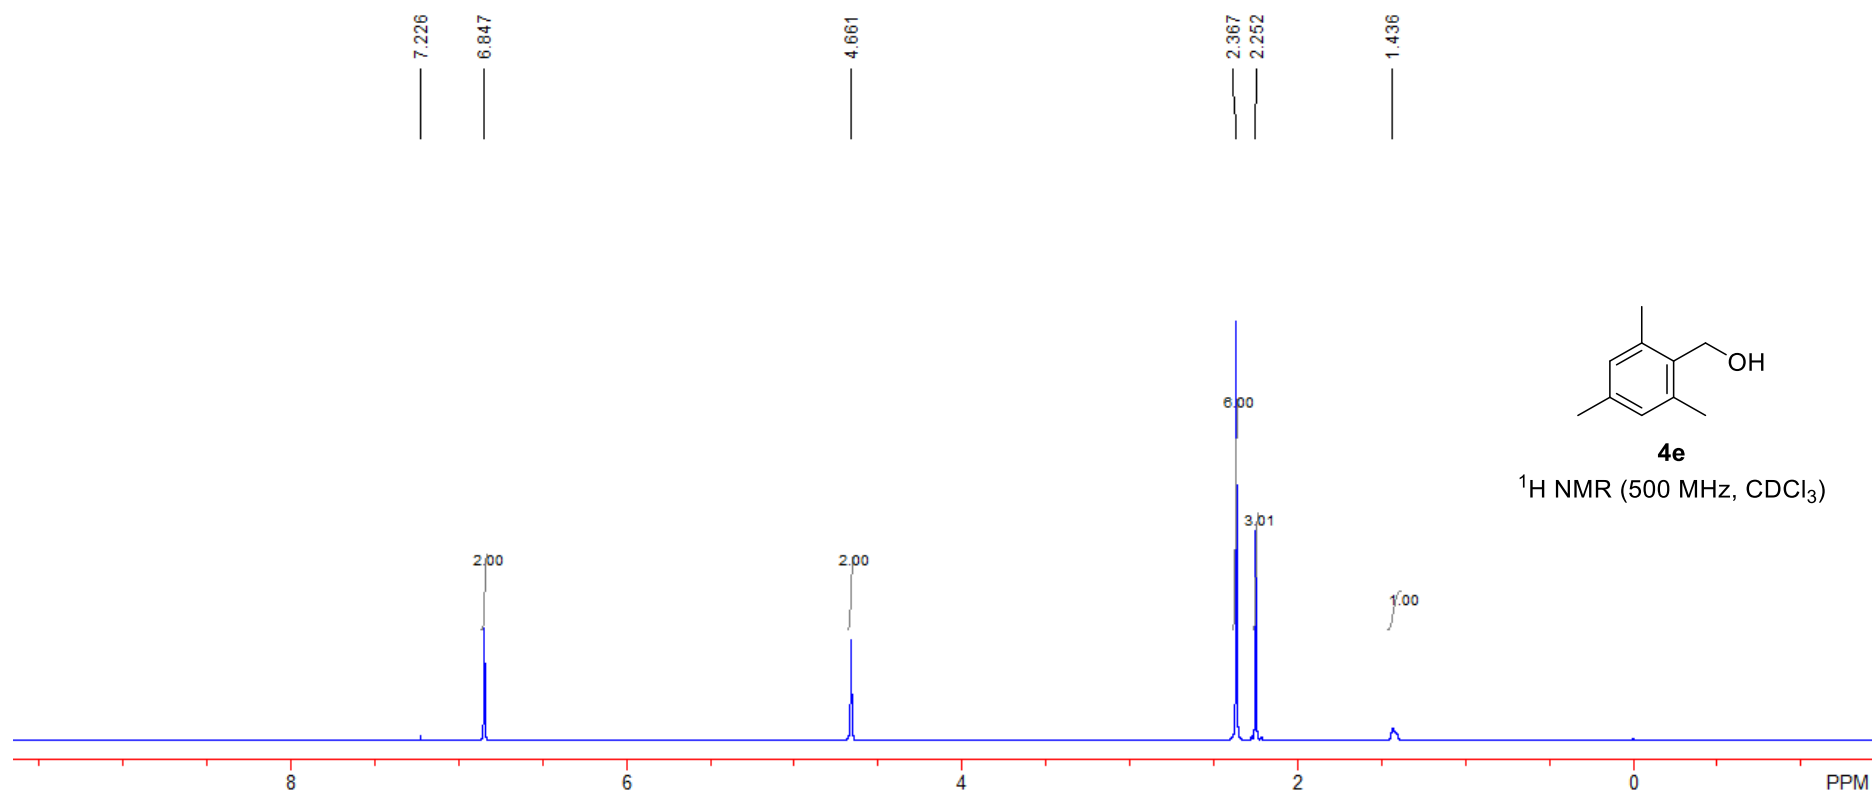

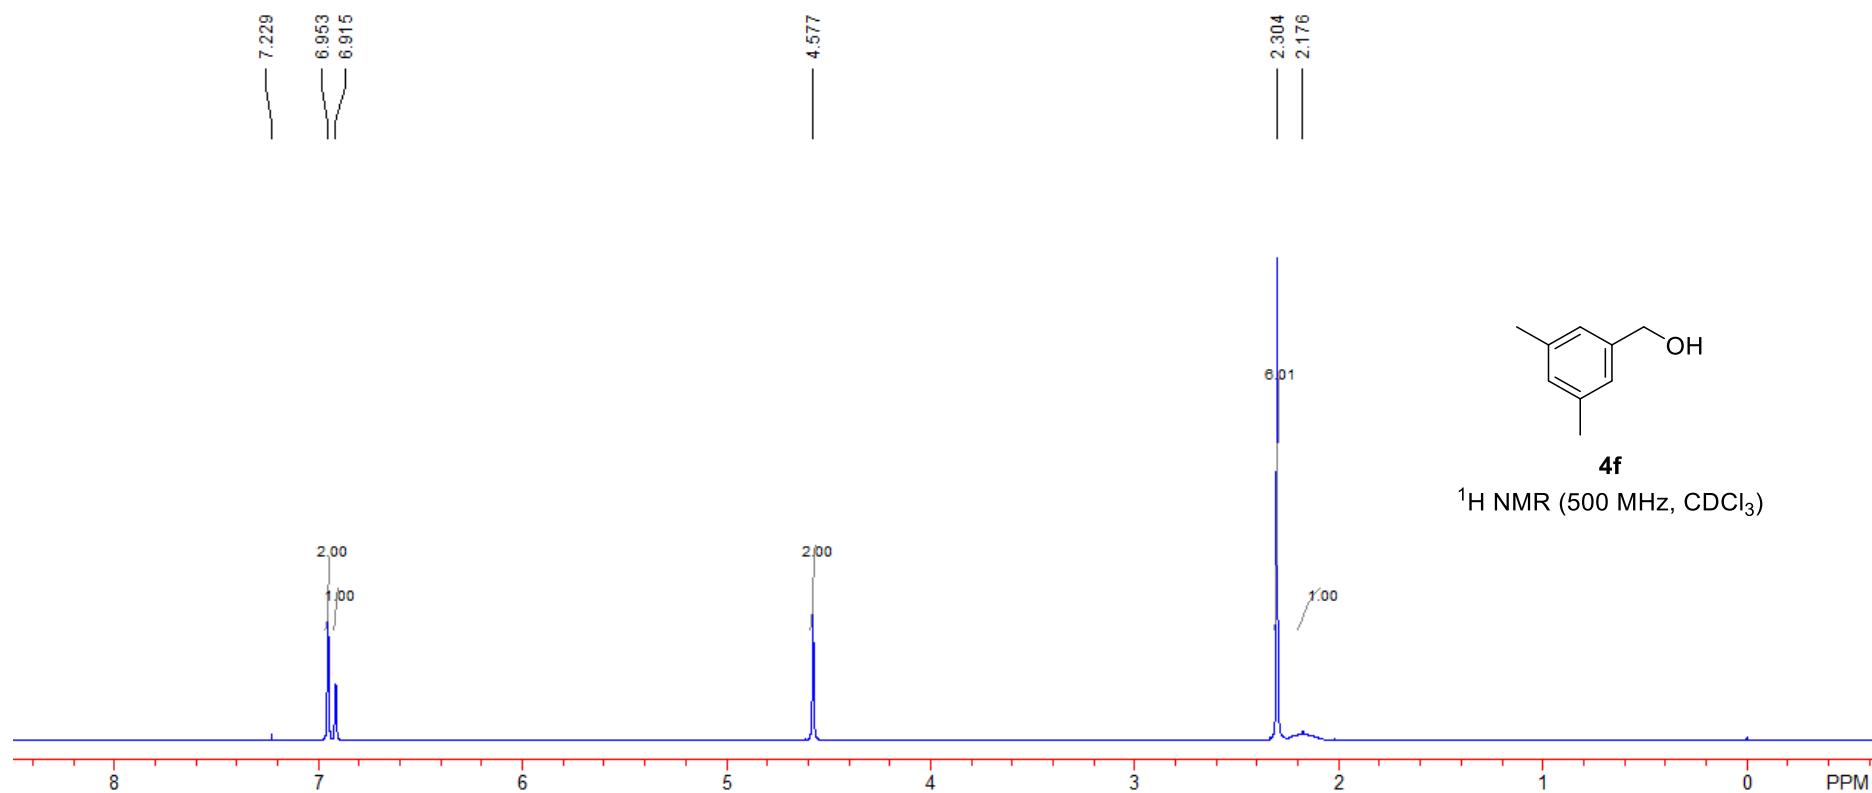

7.247  
7.152  
7.137  
7.127  
7.122  
7.113  
6.954

4.636

2.221  
2.217

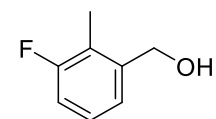

**4g**

<sup>1</sup>H NMR (500 MHz, CDCl<sub>3</sub>)

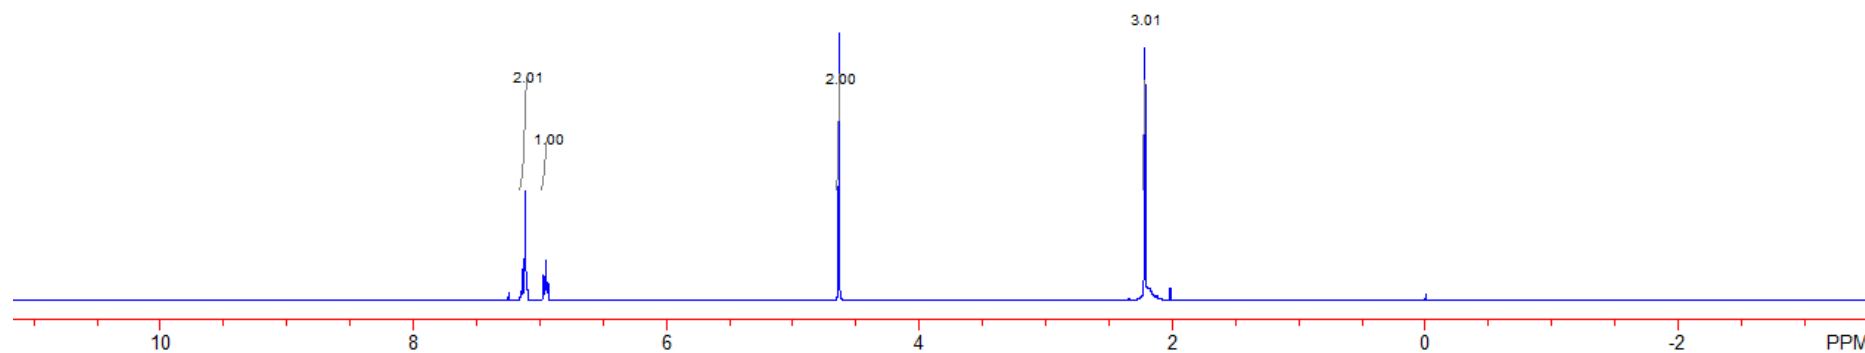

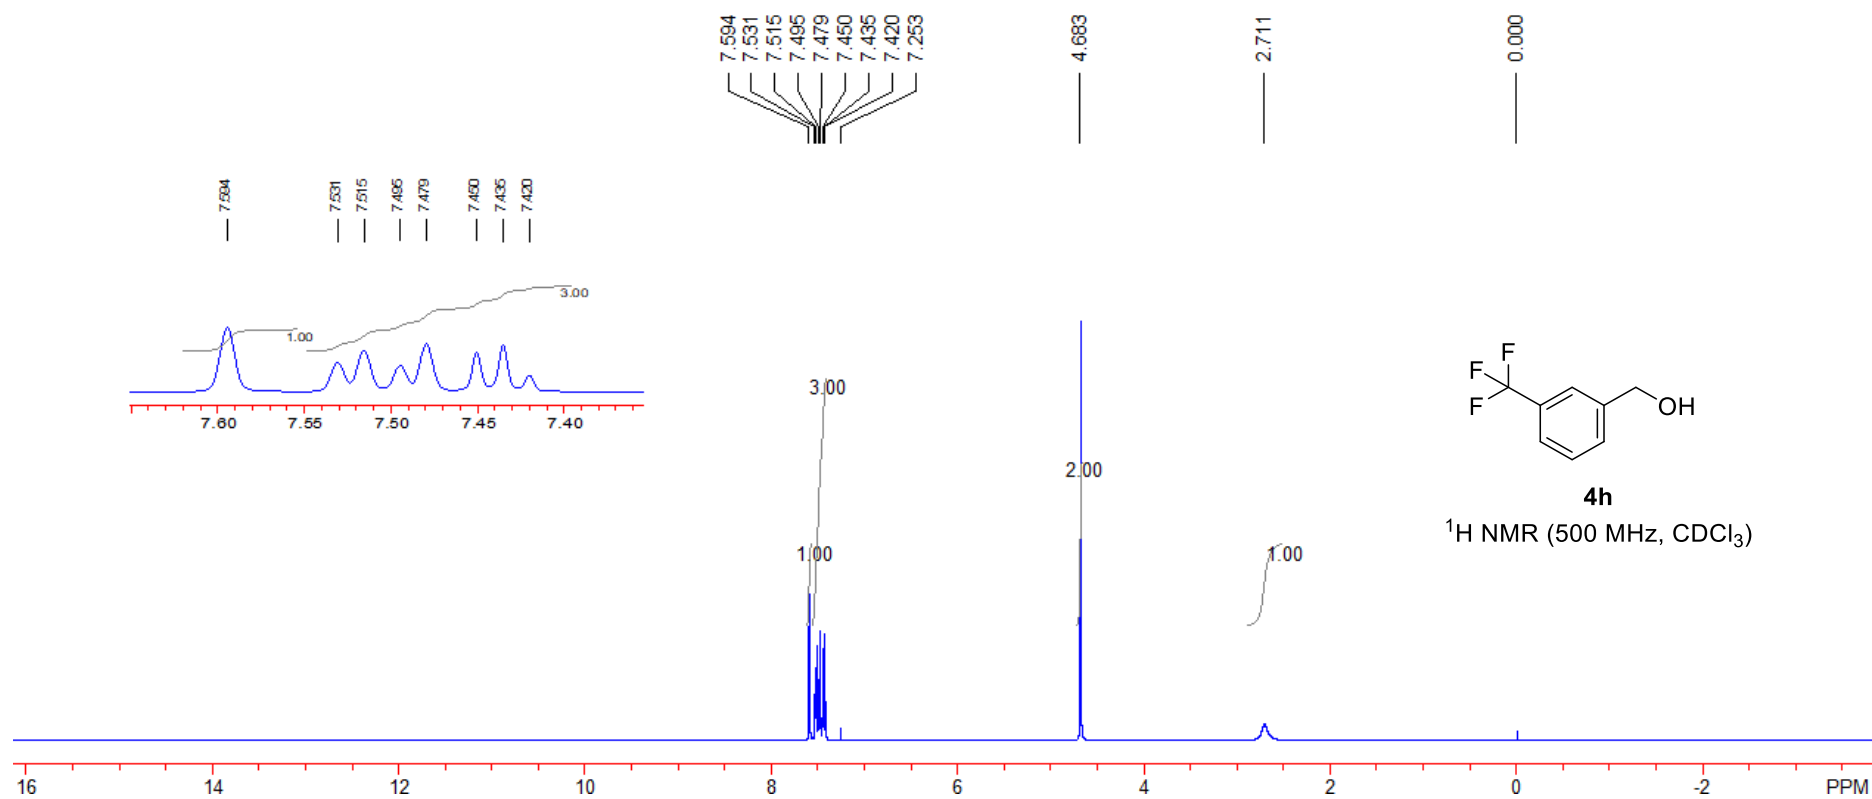

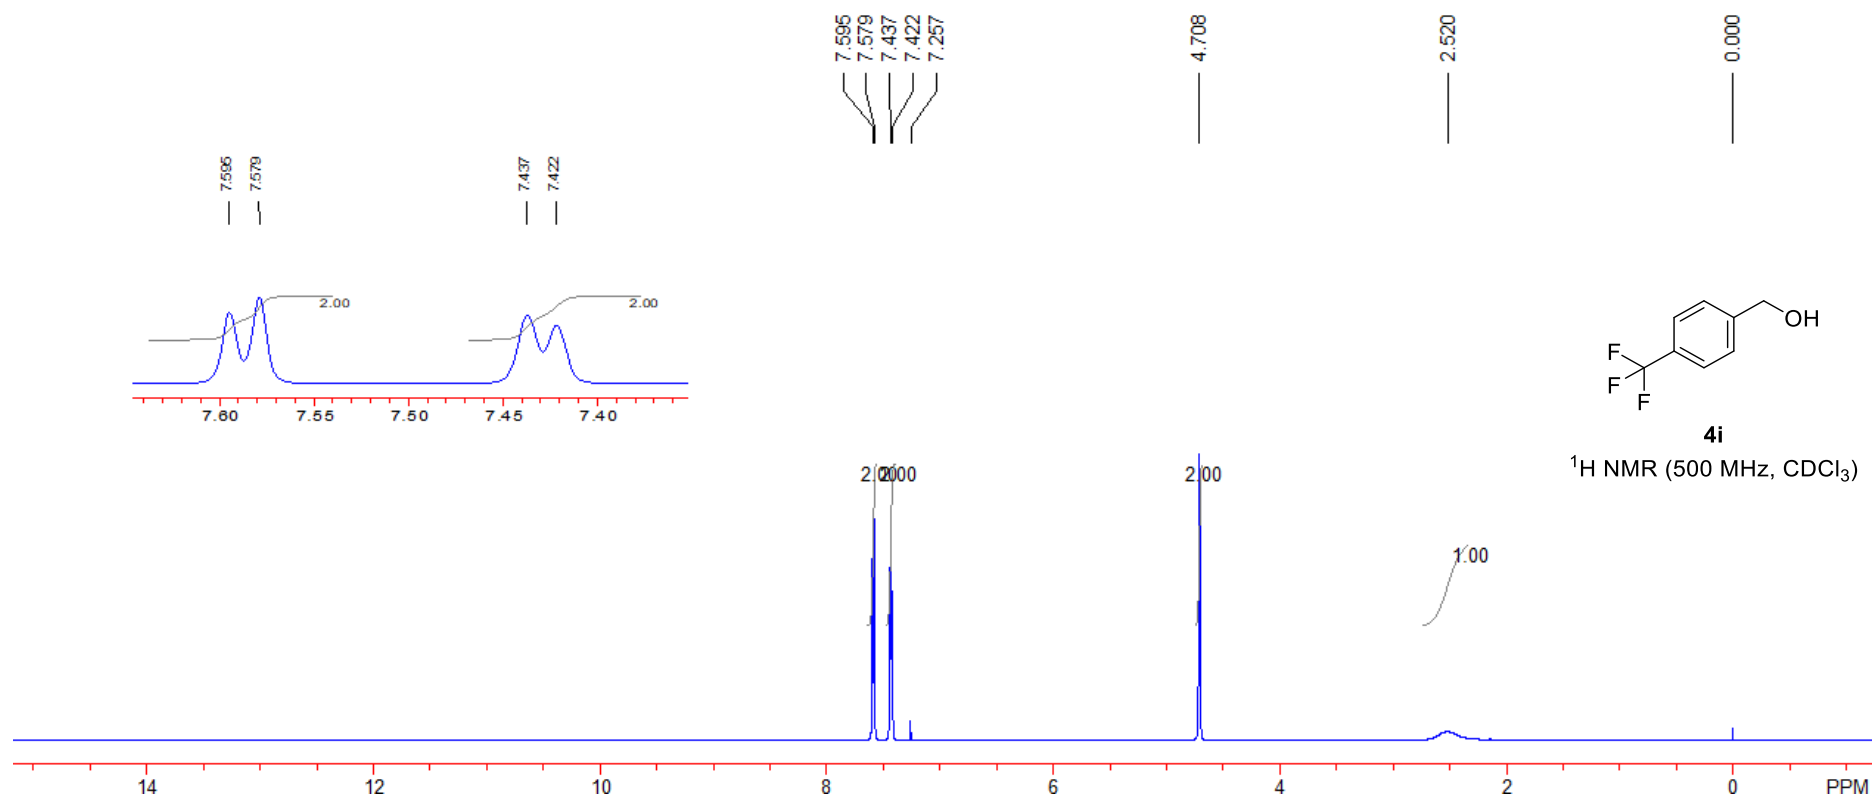

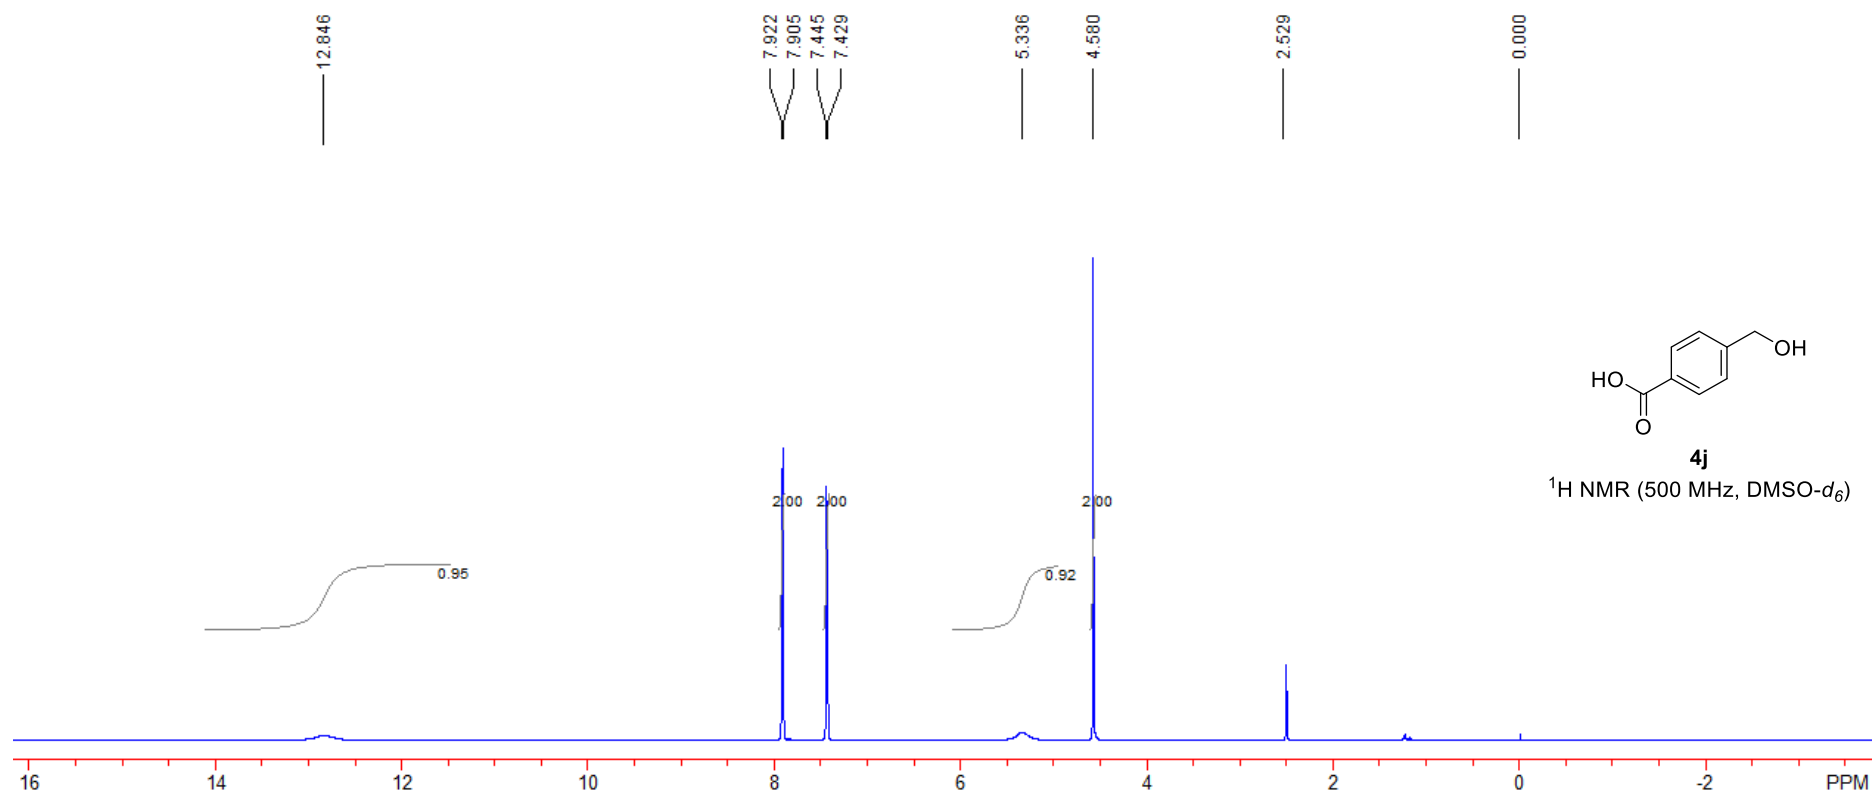

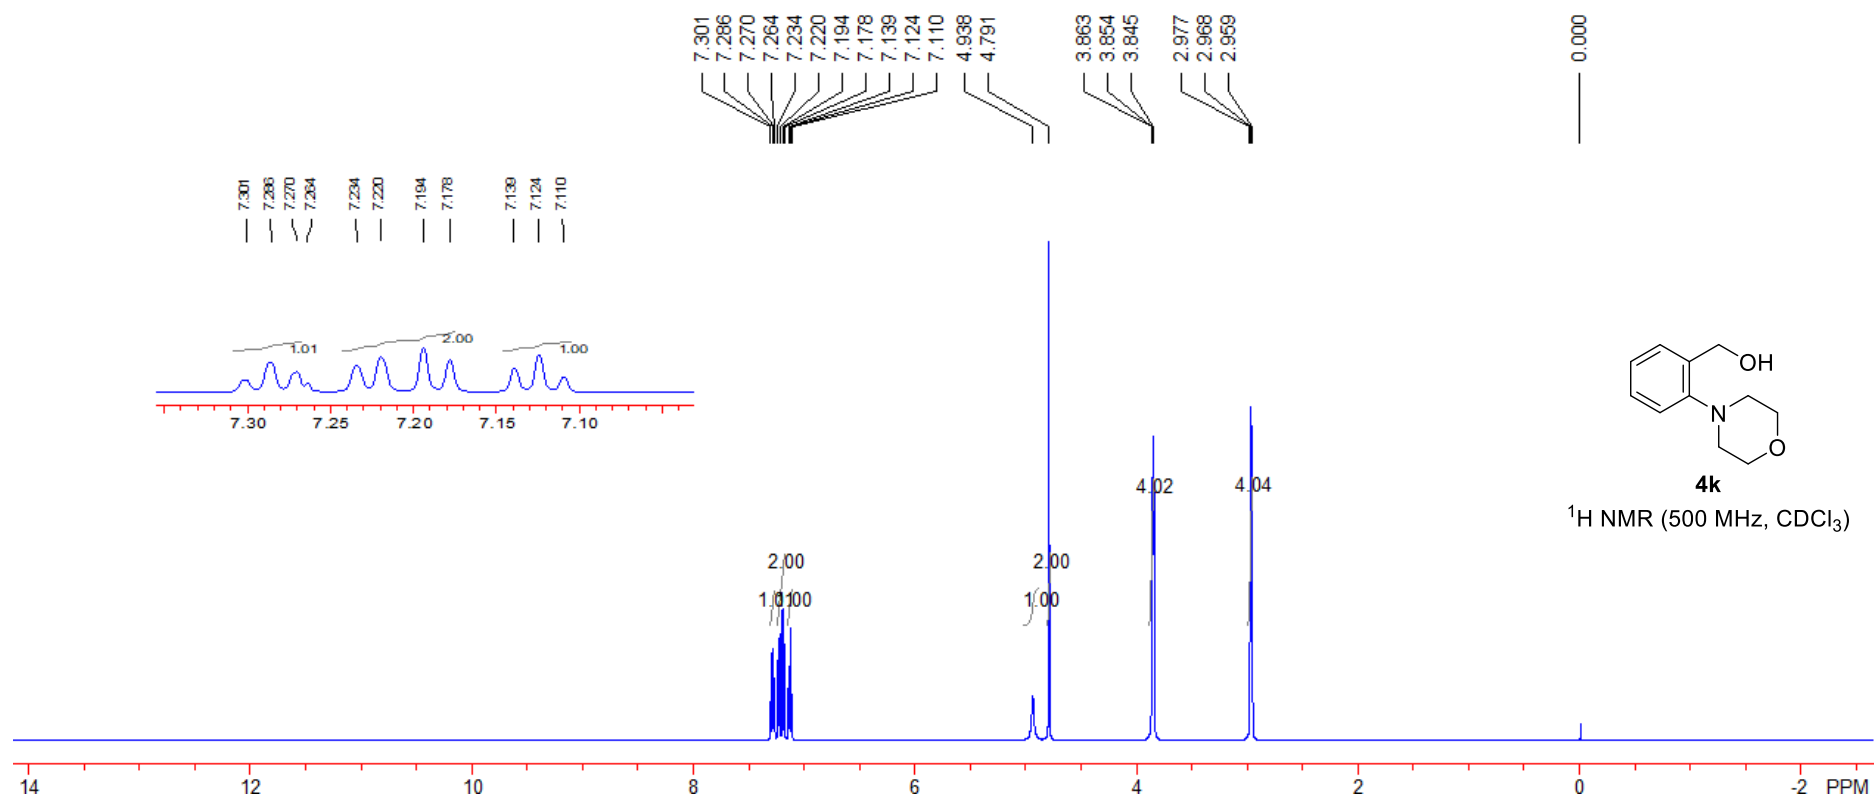

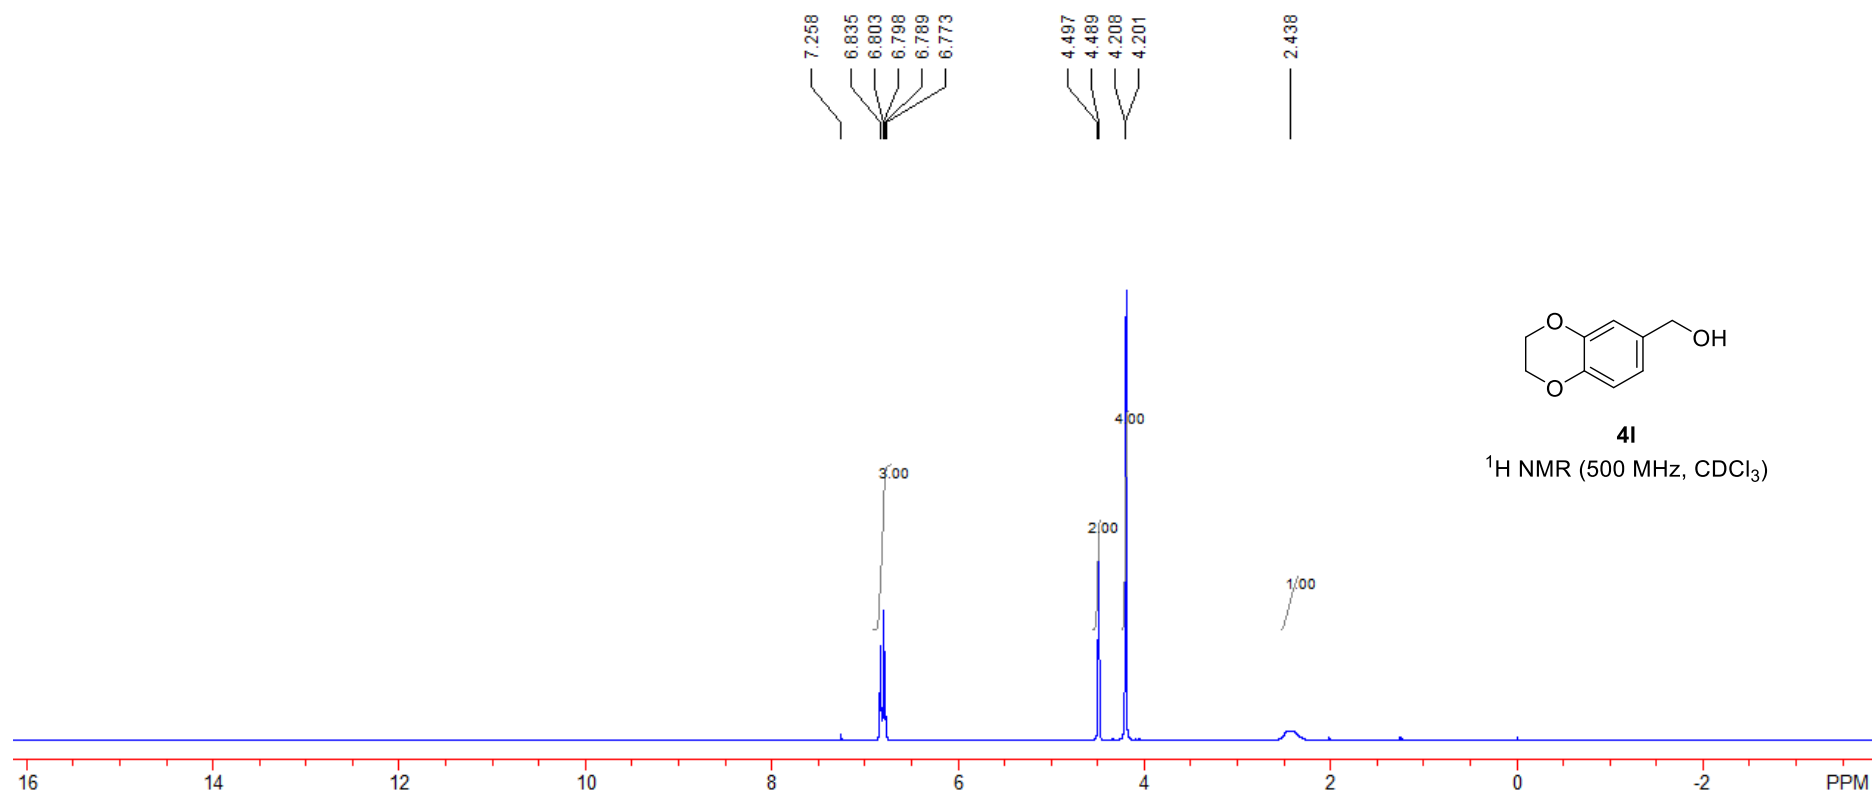

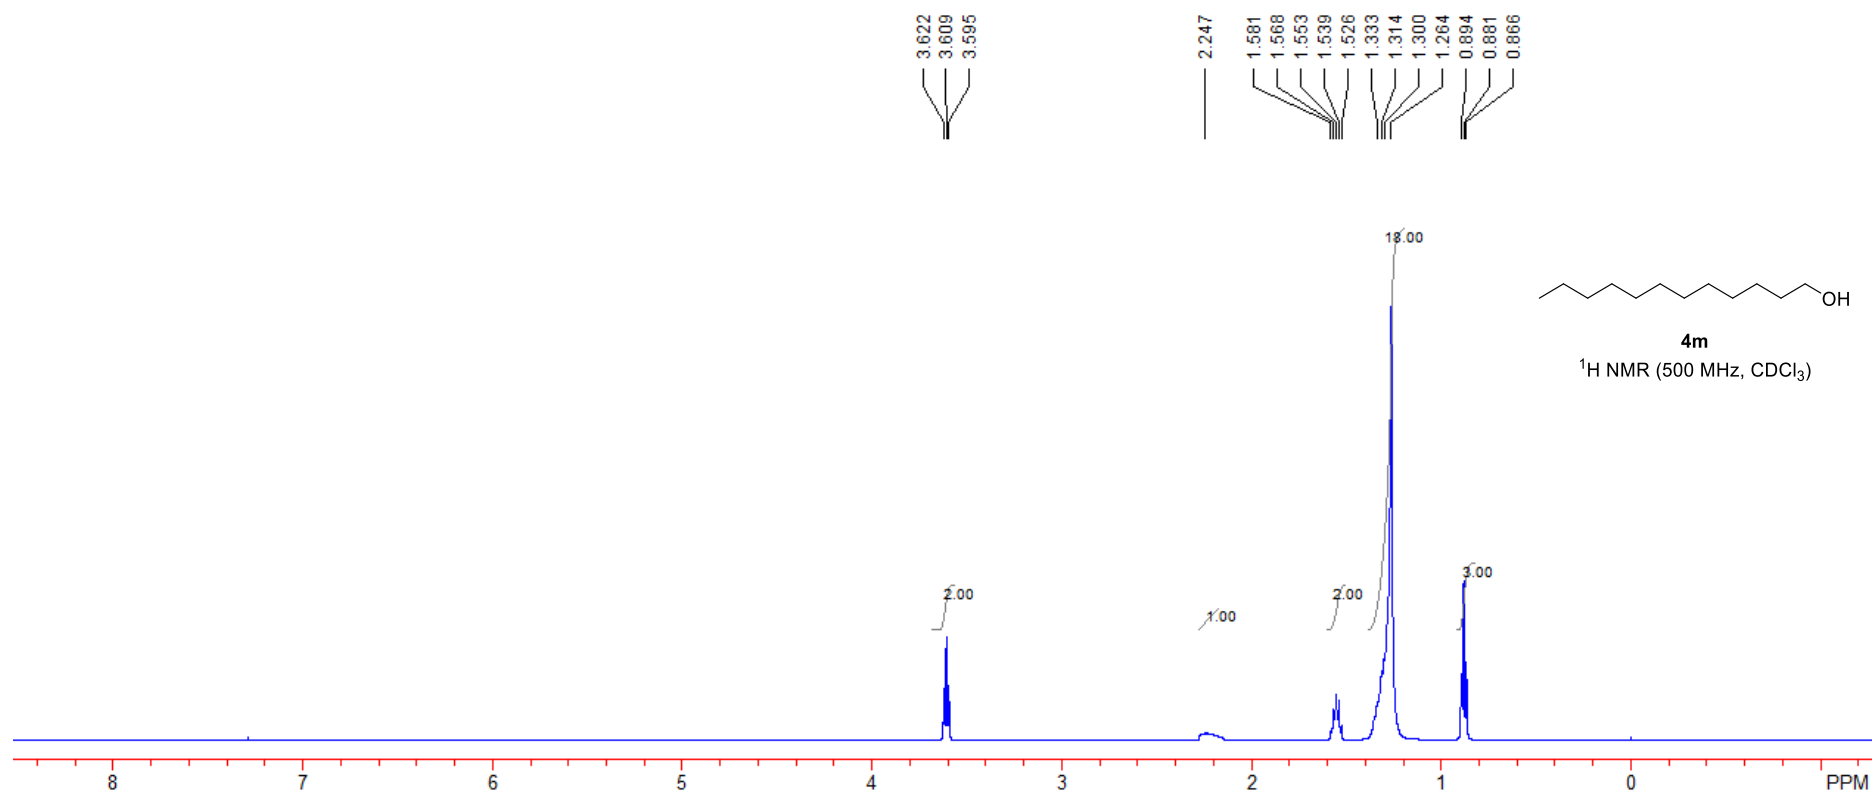

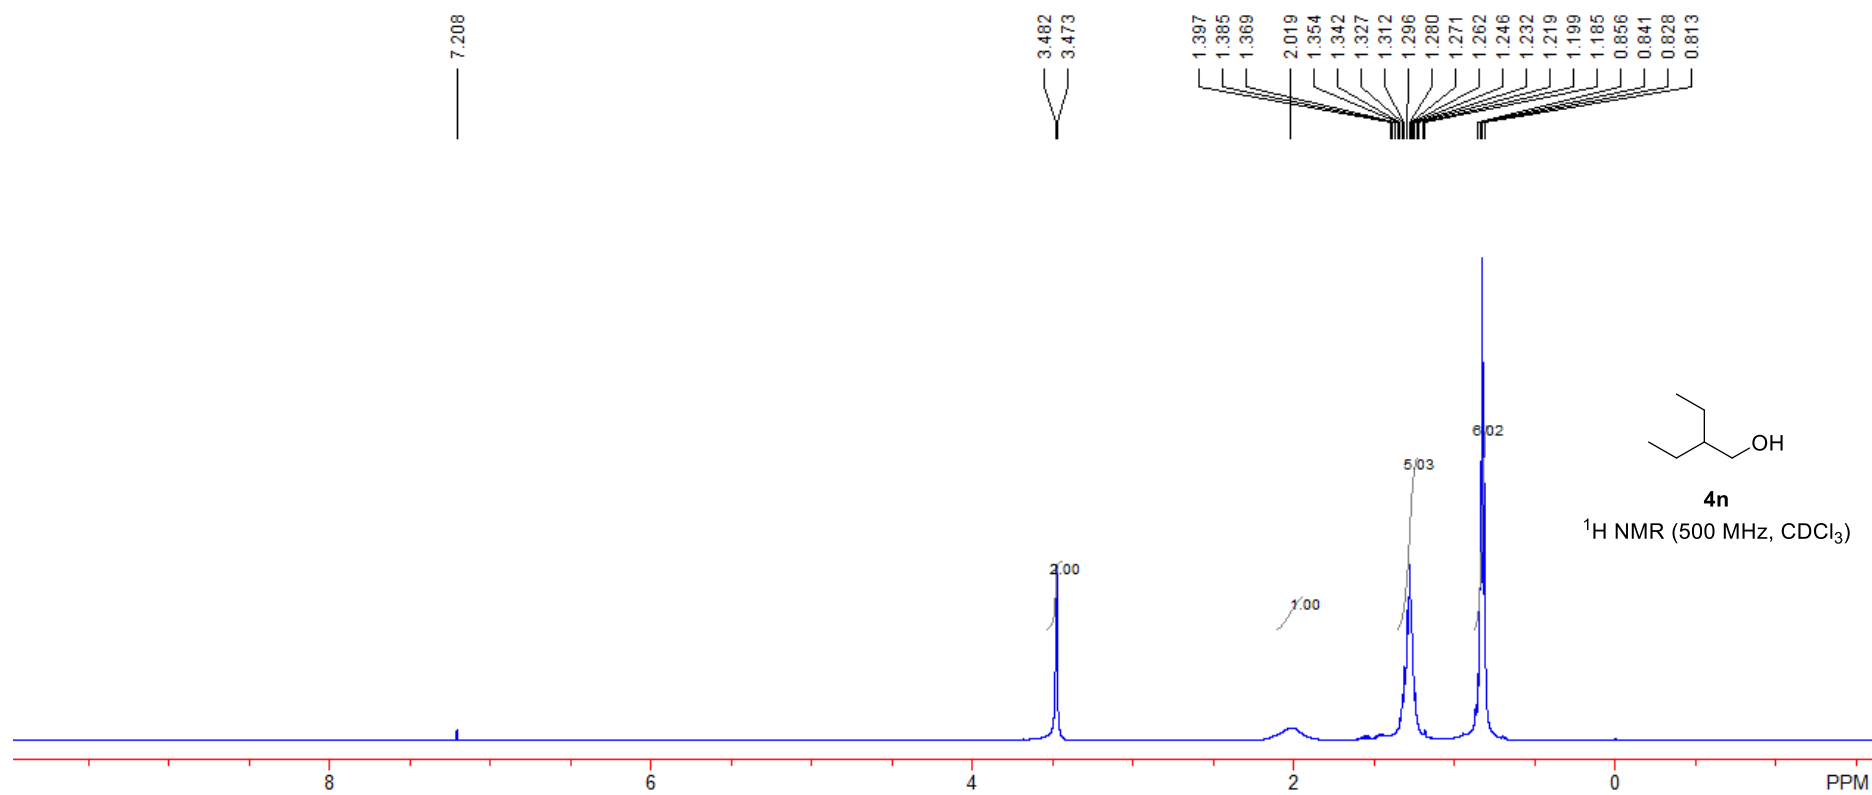

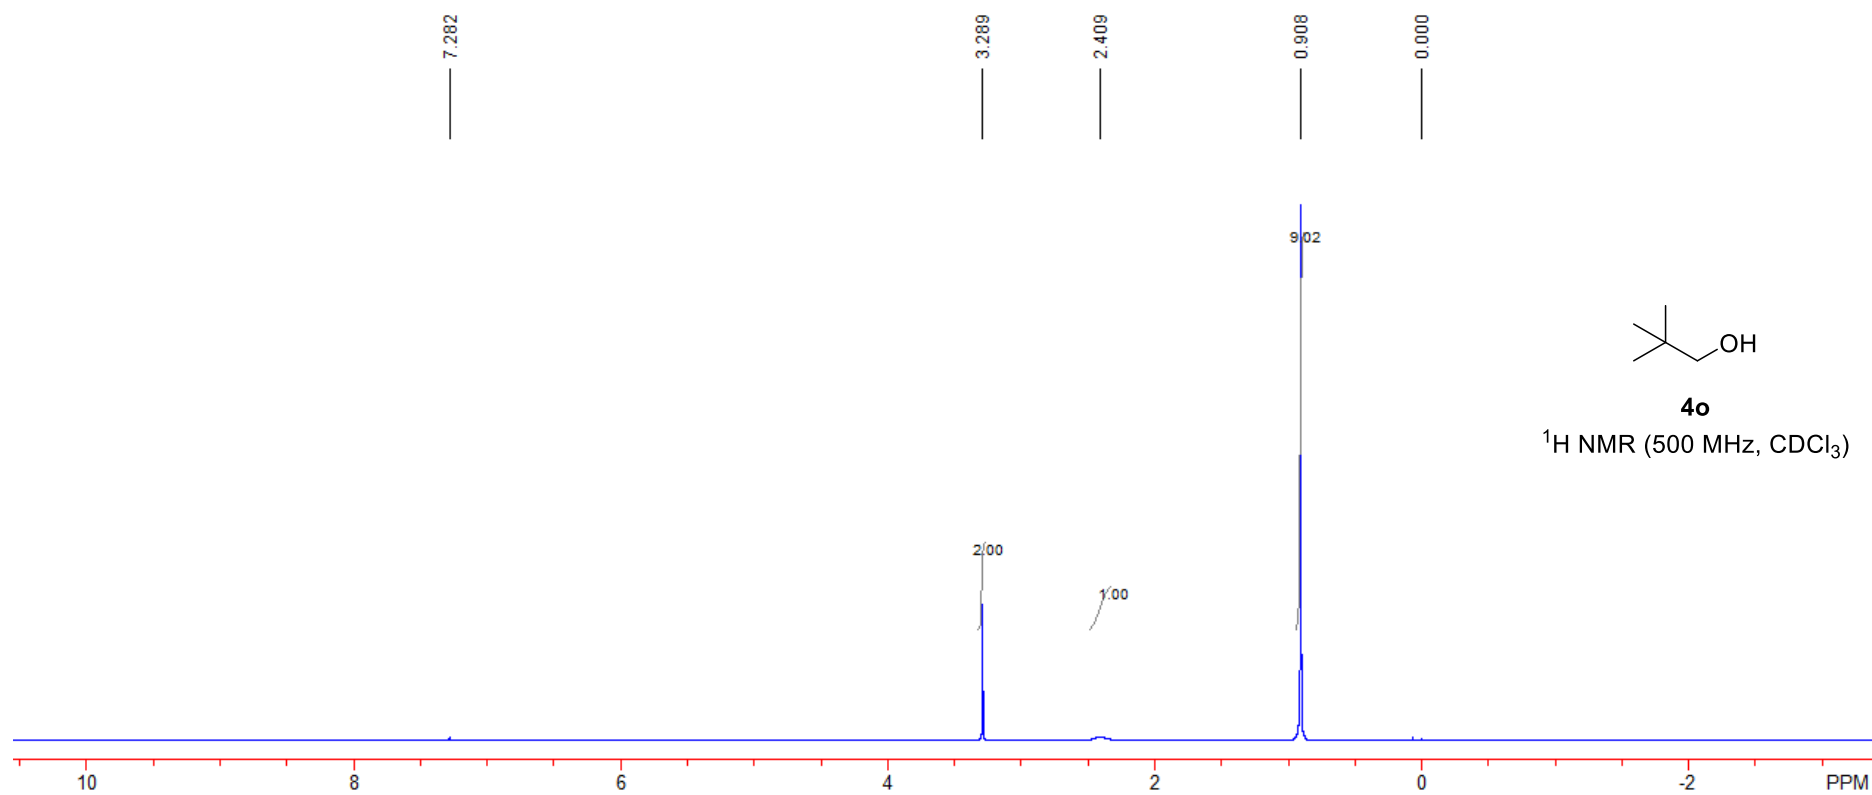

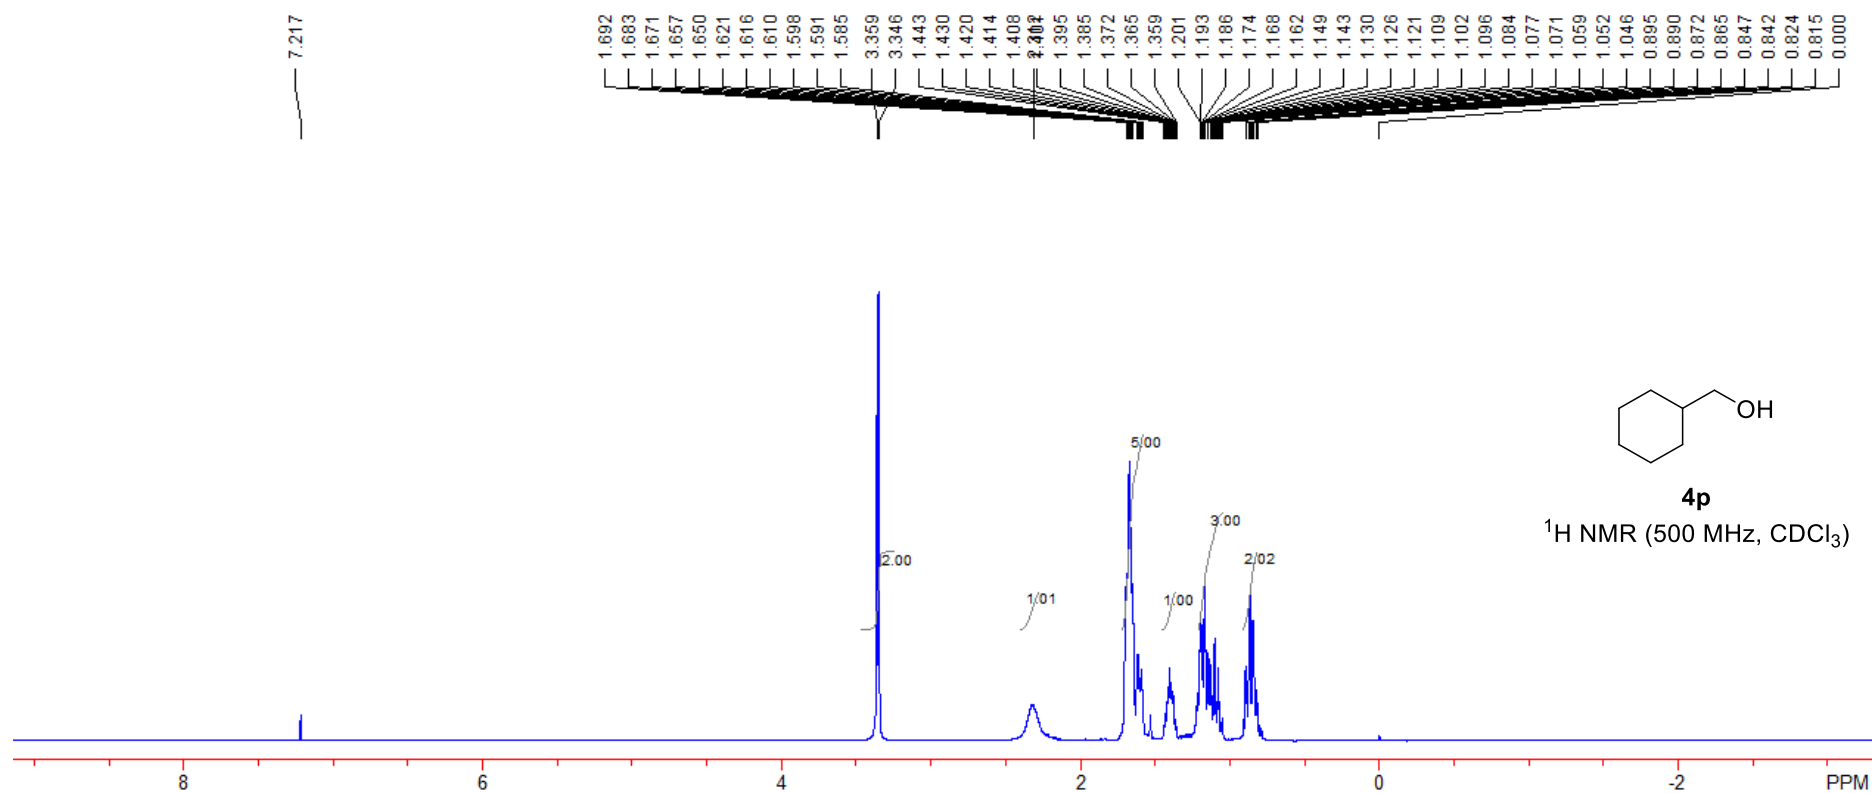

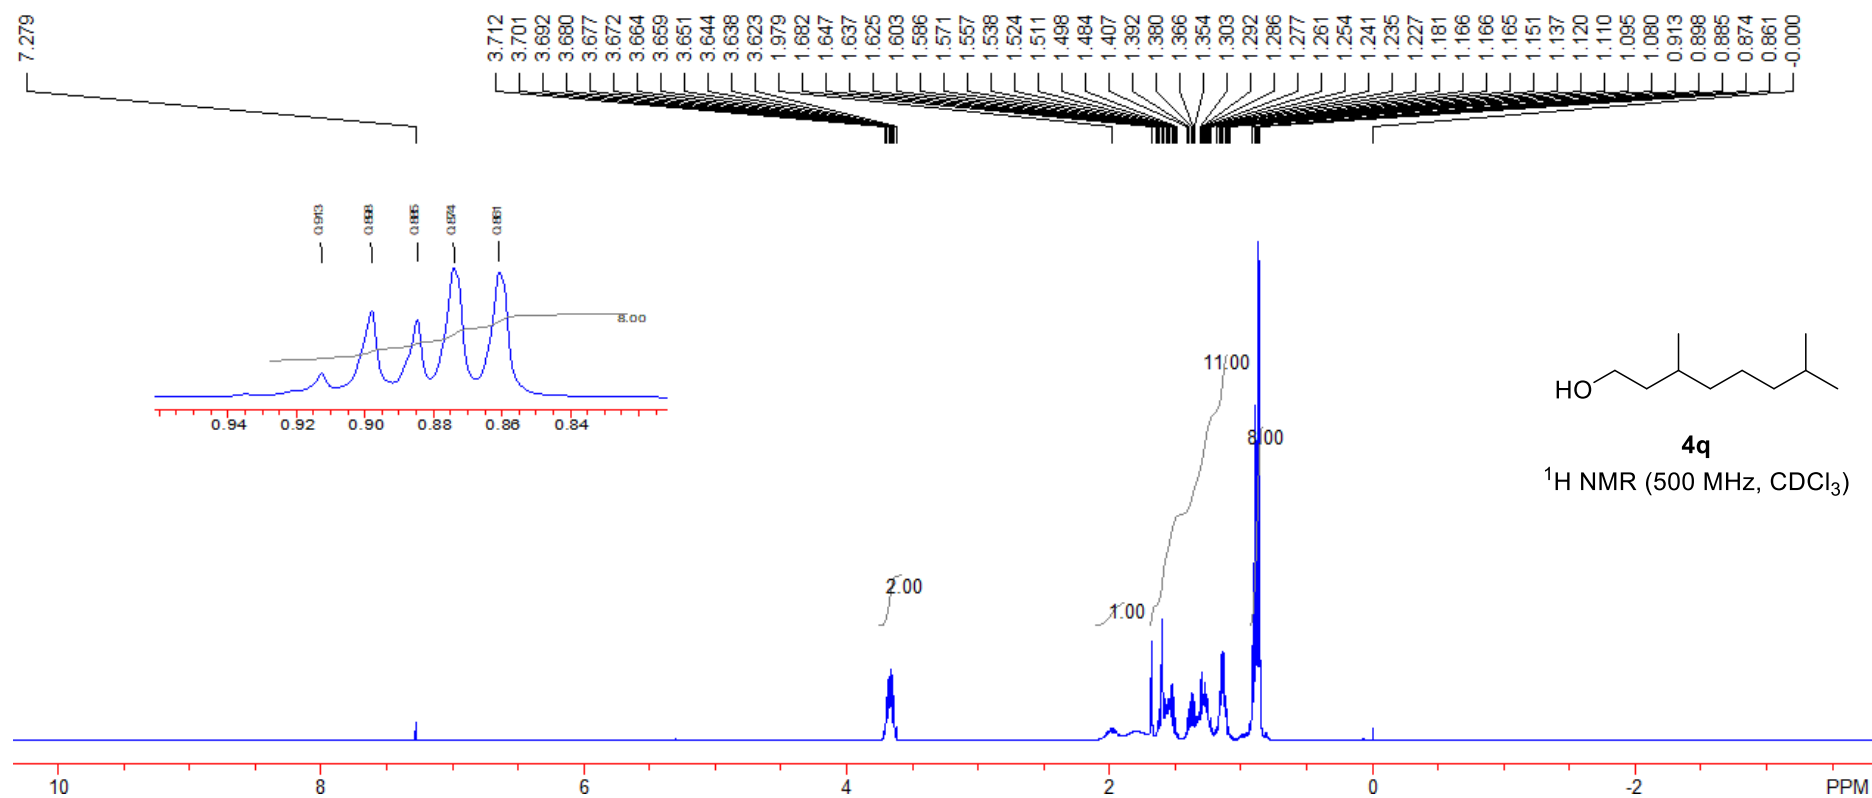

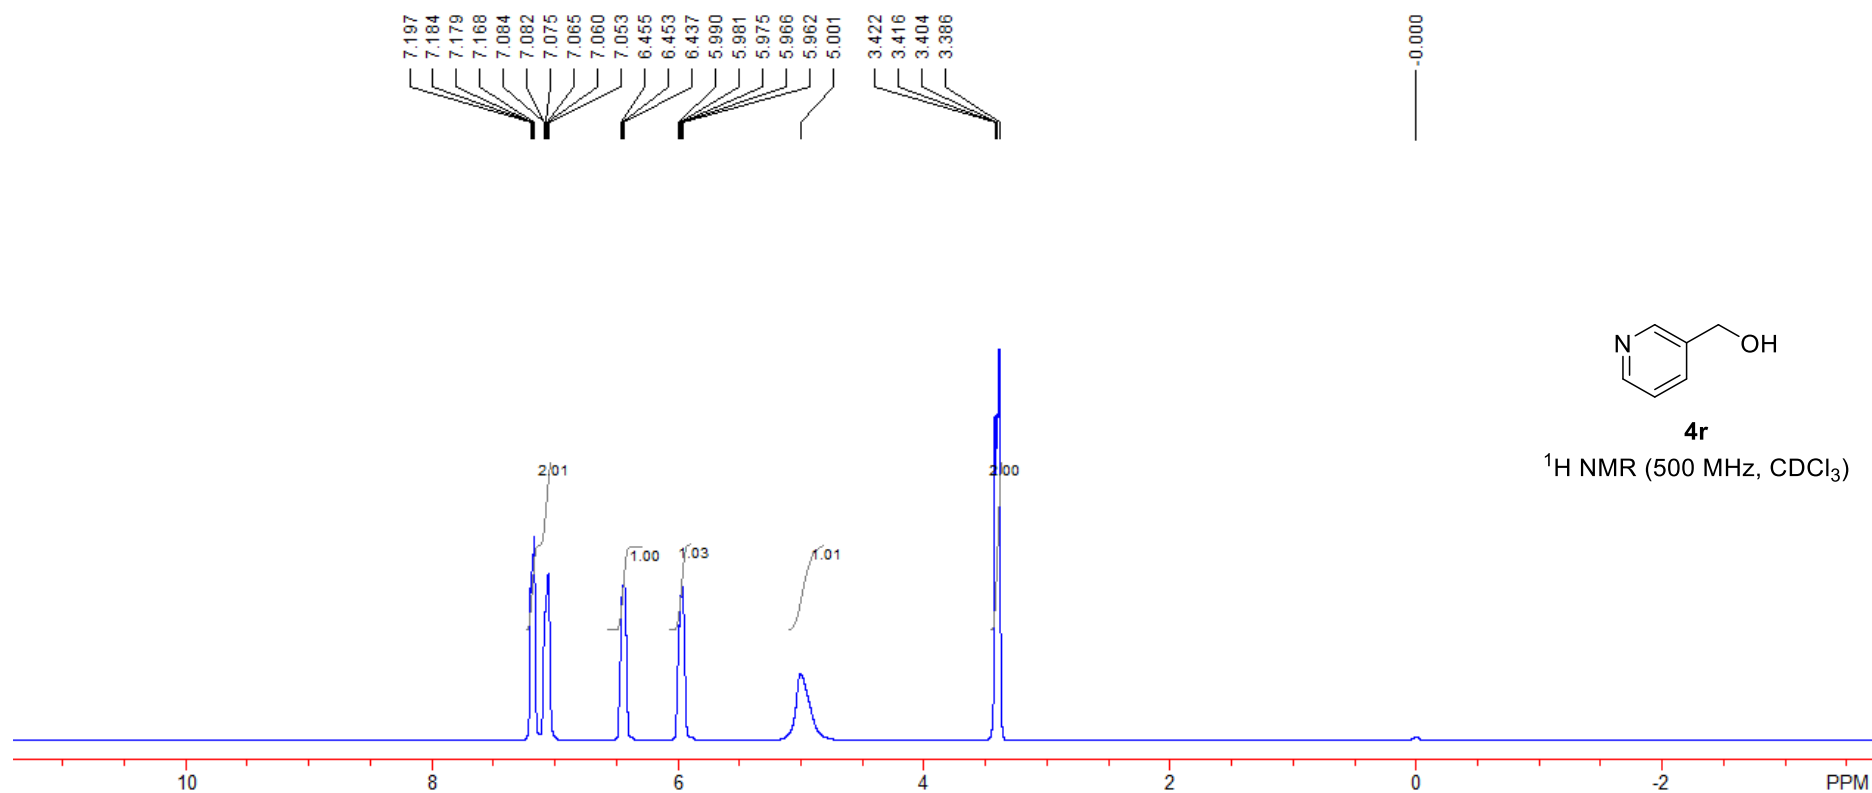

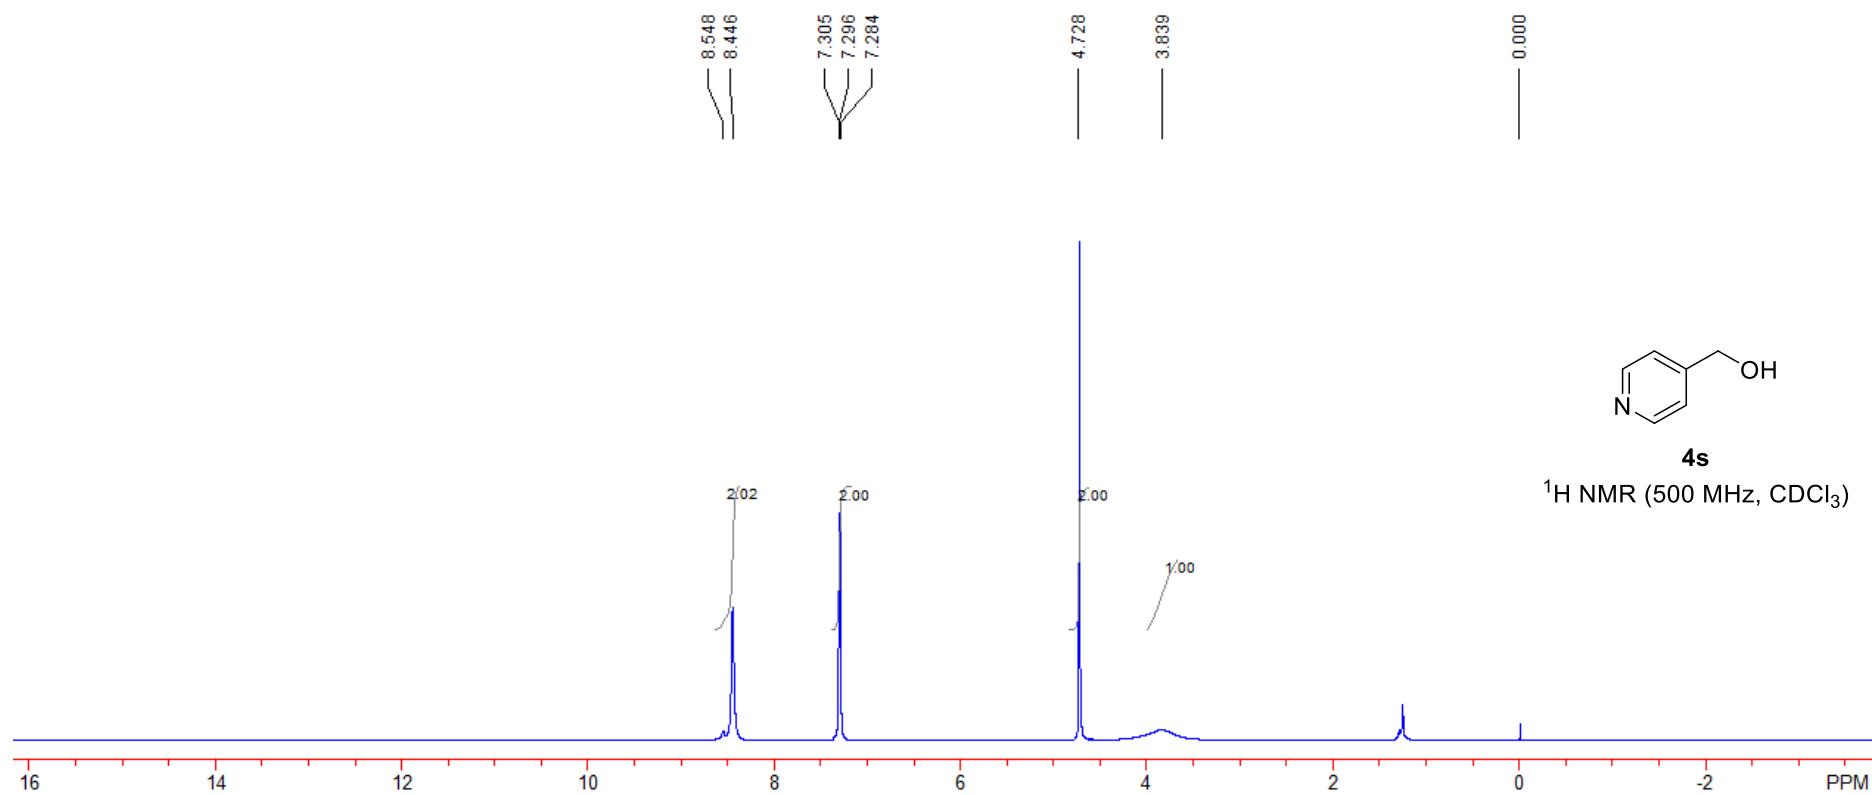

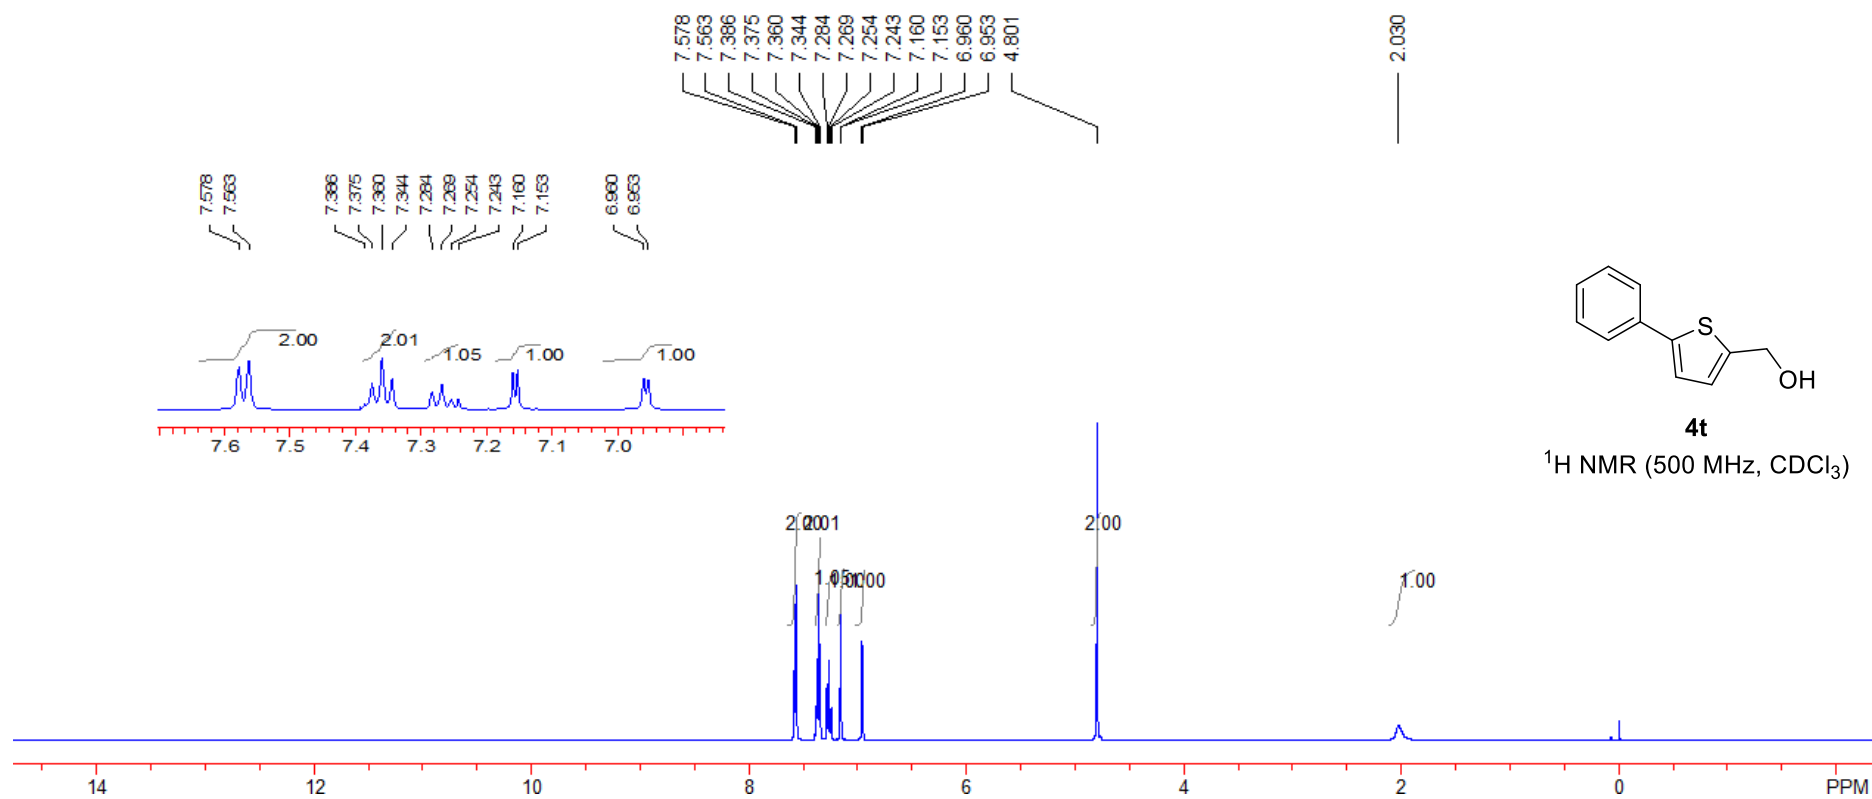

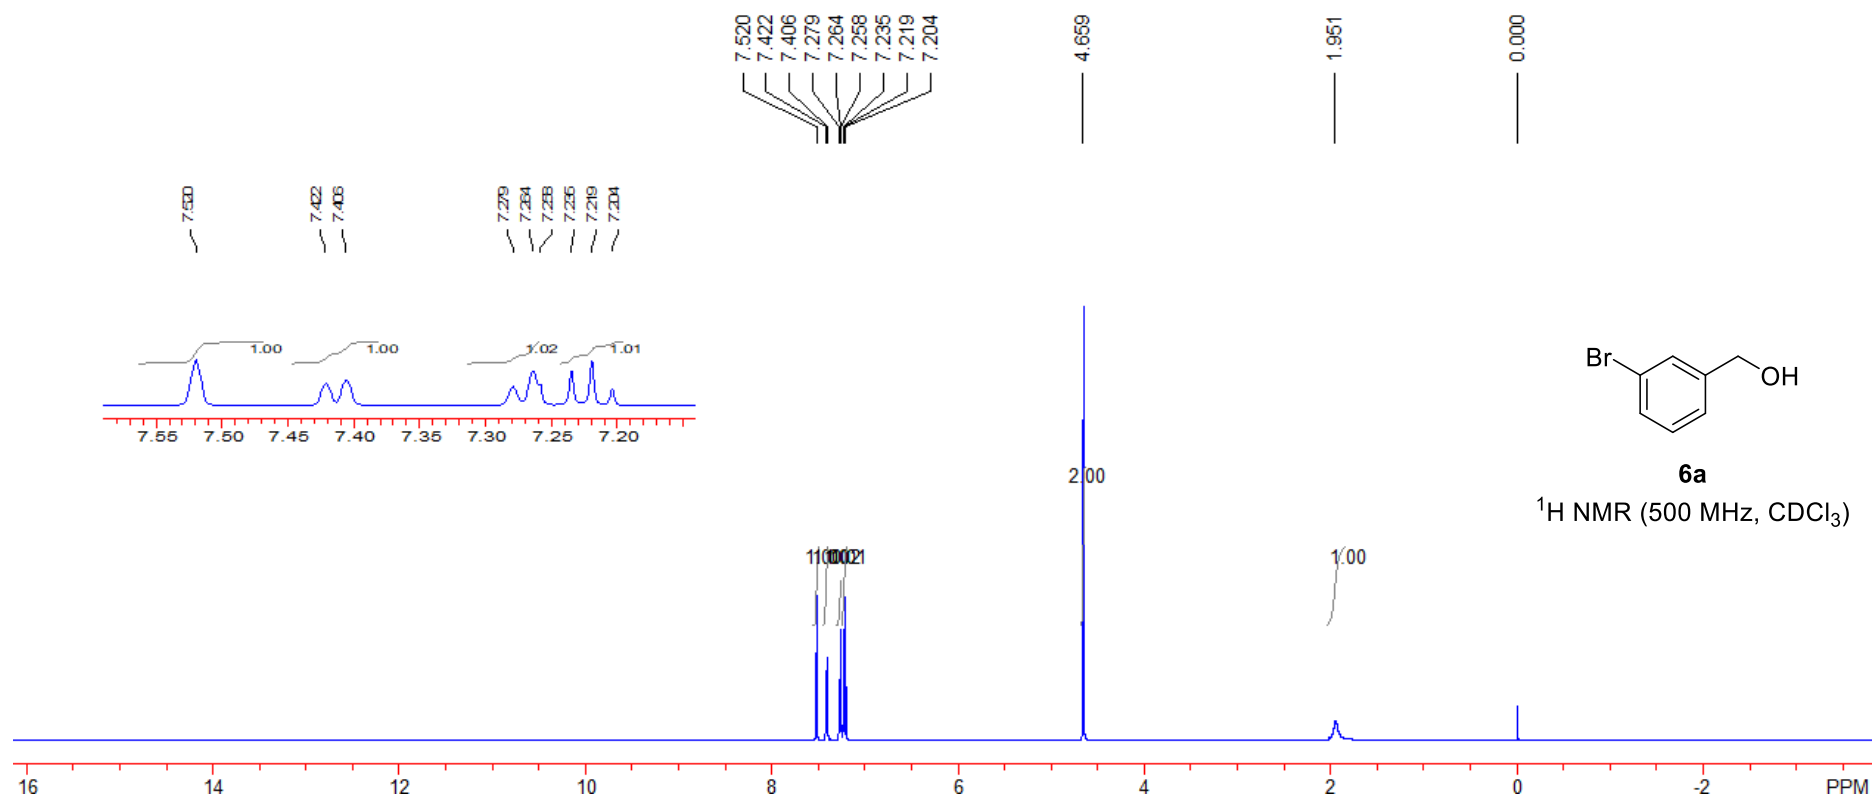

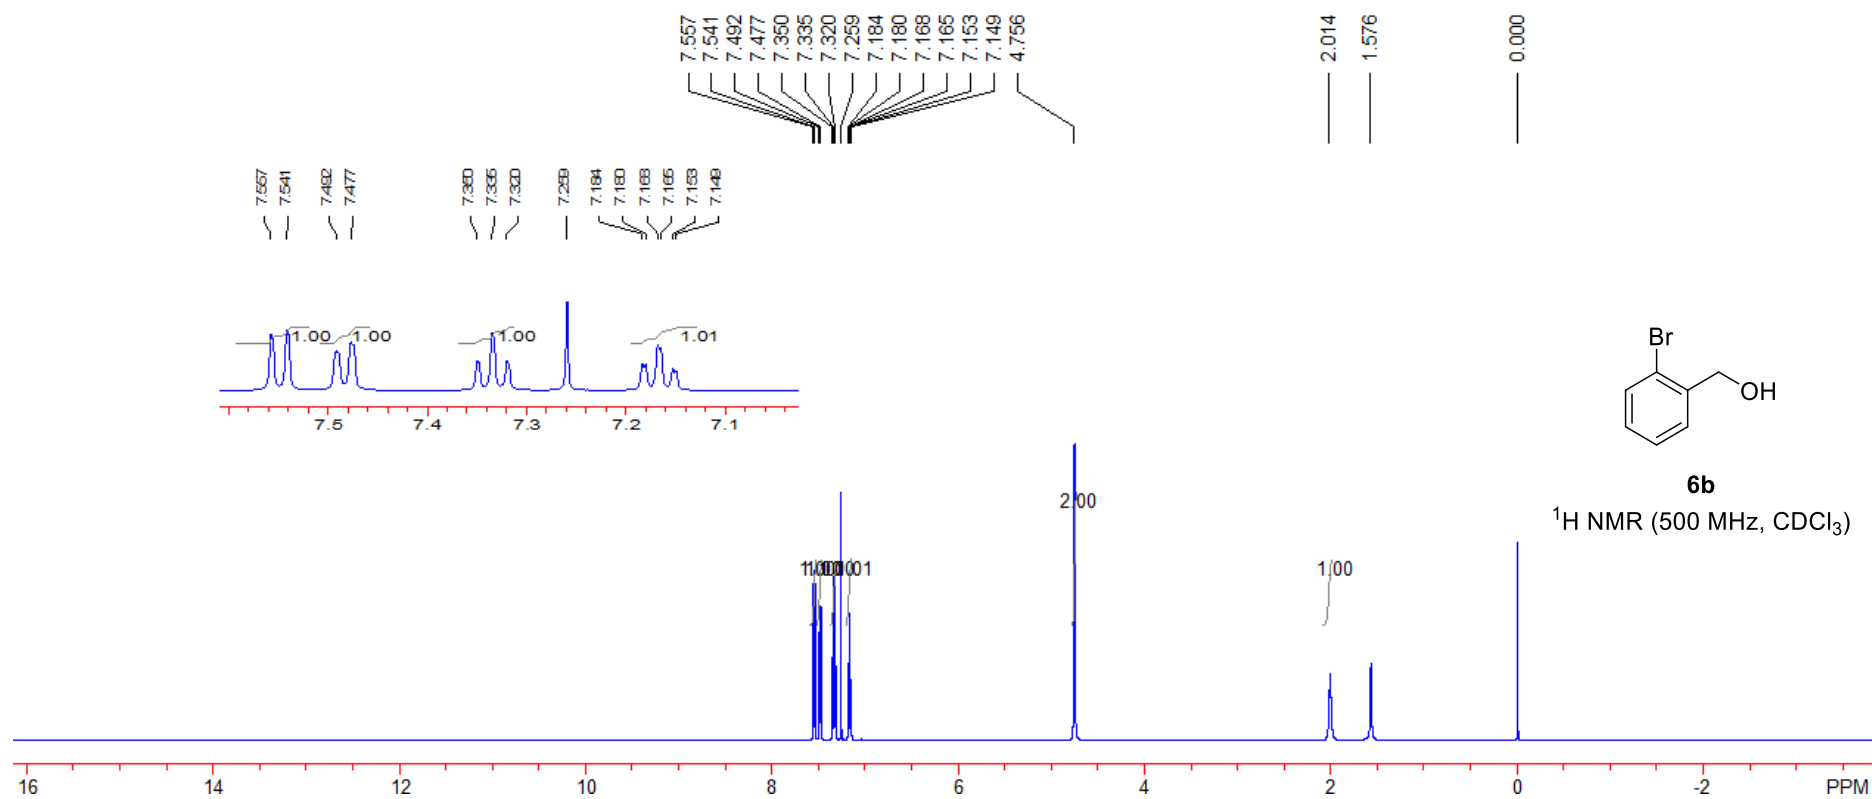

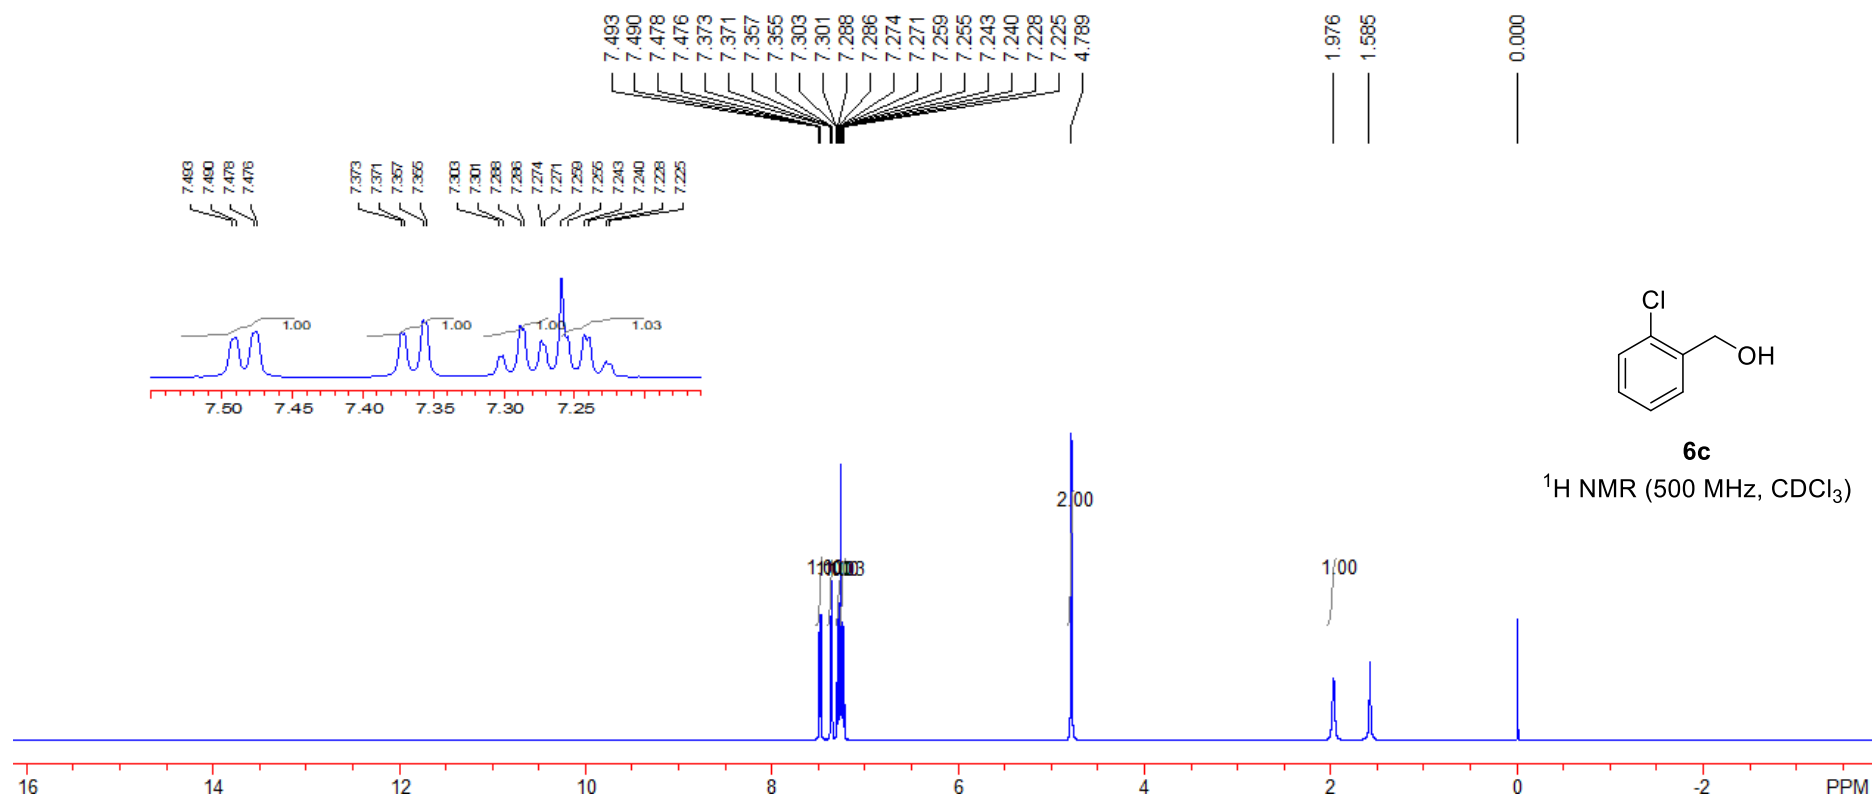

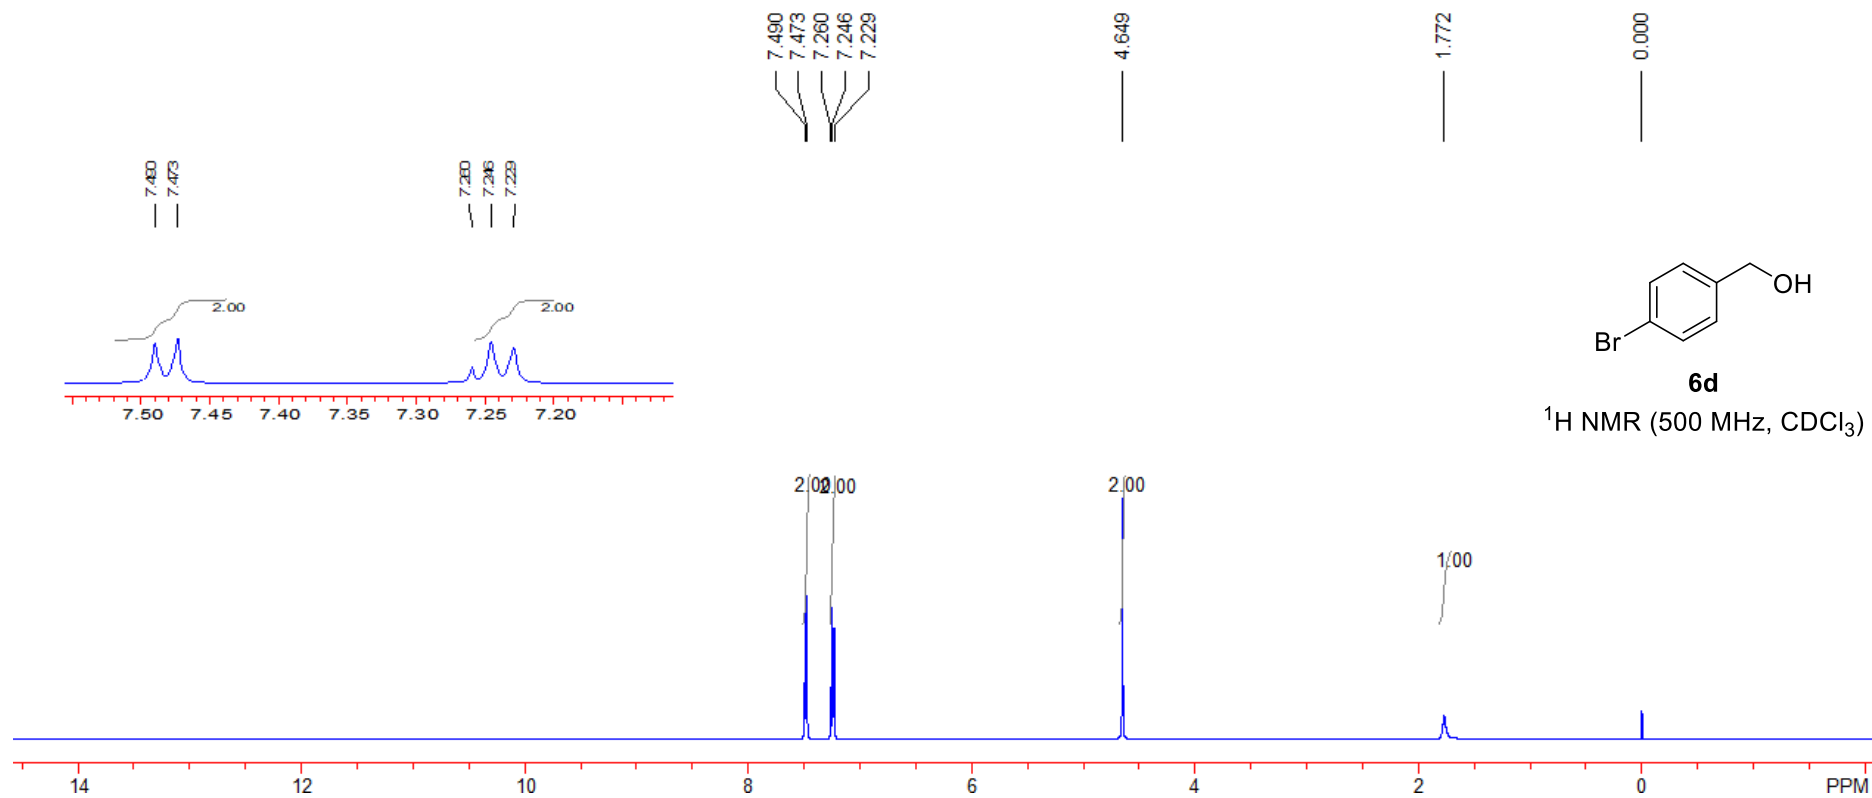

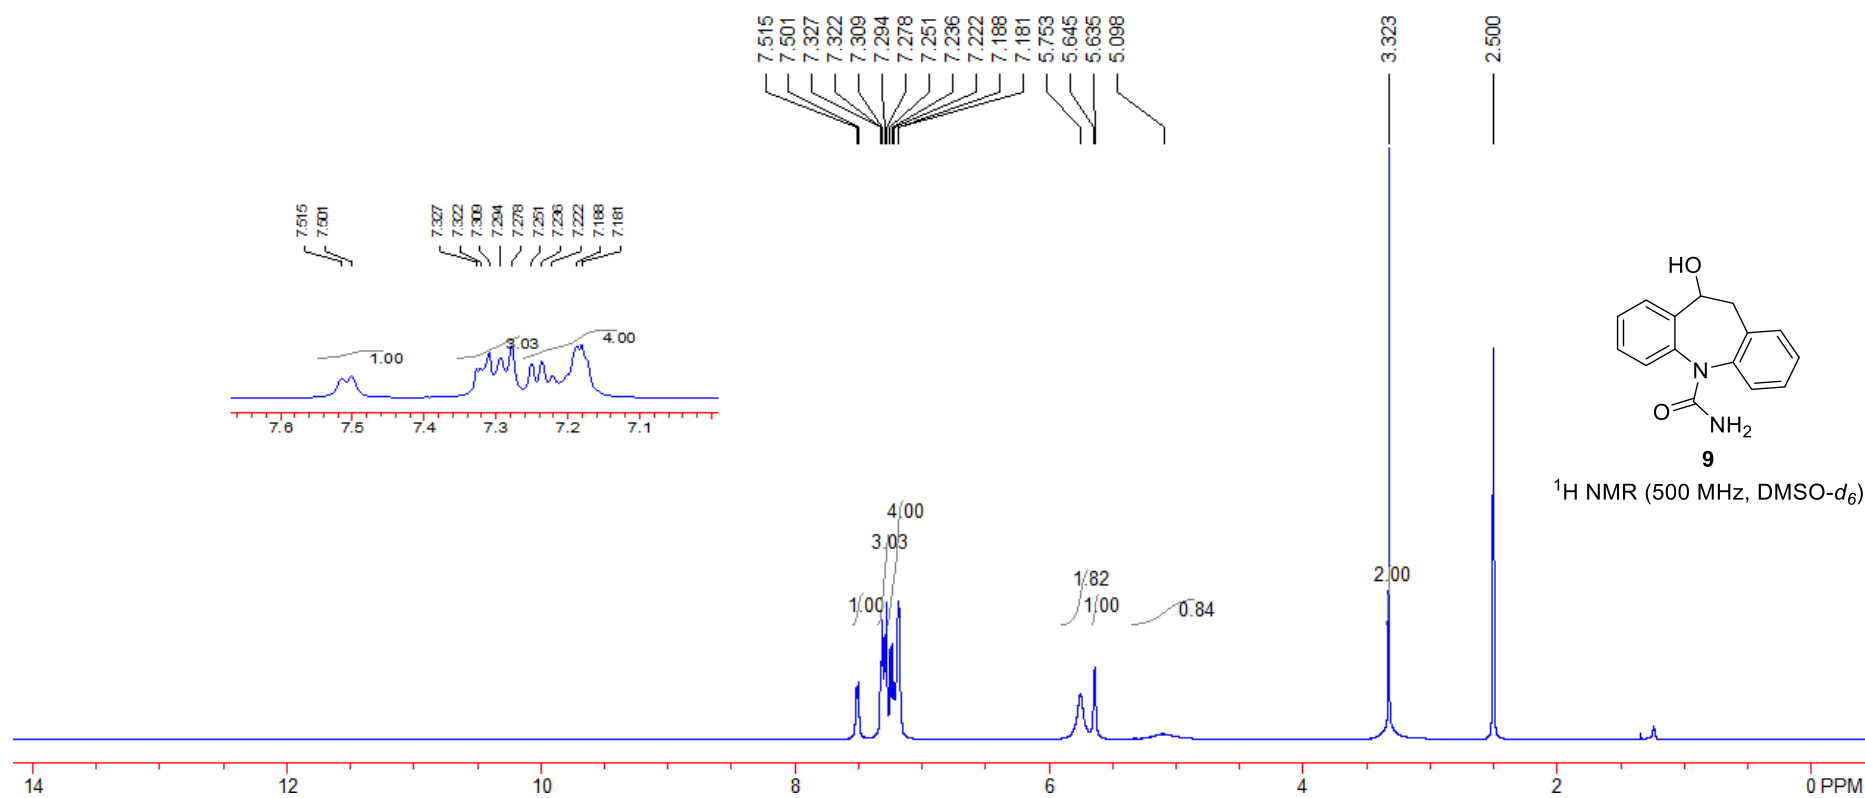

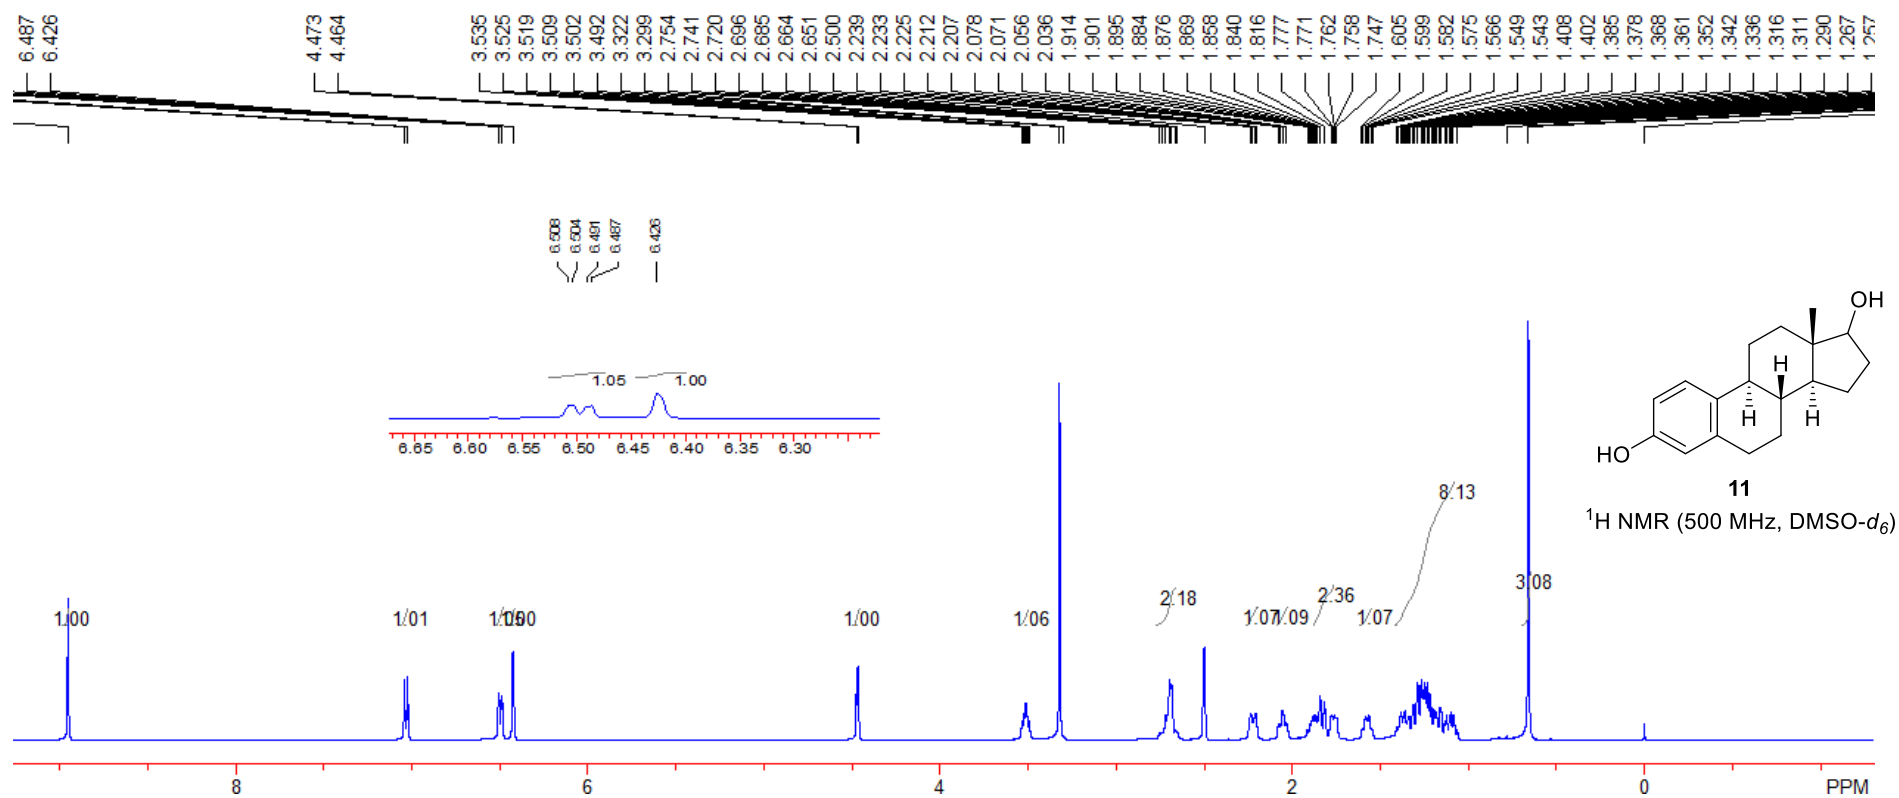

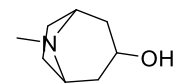

**13**

$^1\text{H}$  NMR (500 MHz,  $\text{DMSO}-d_6$ )

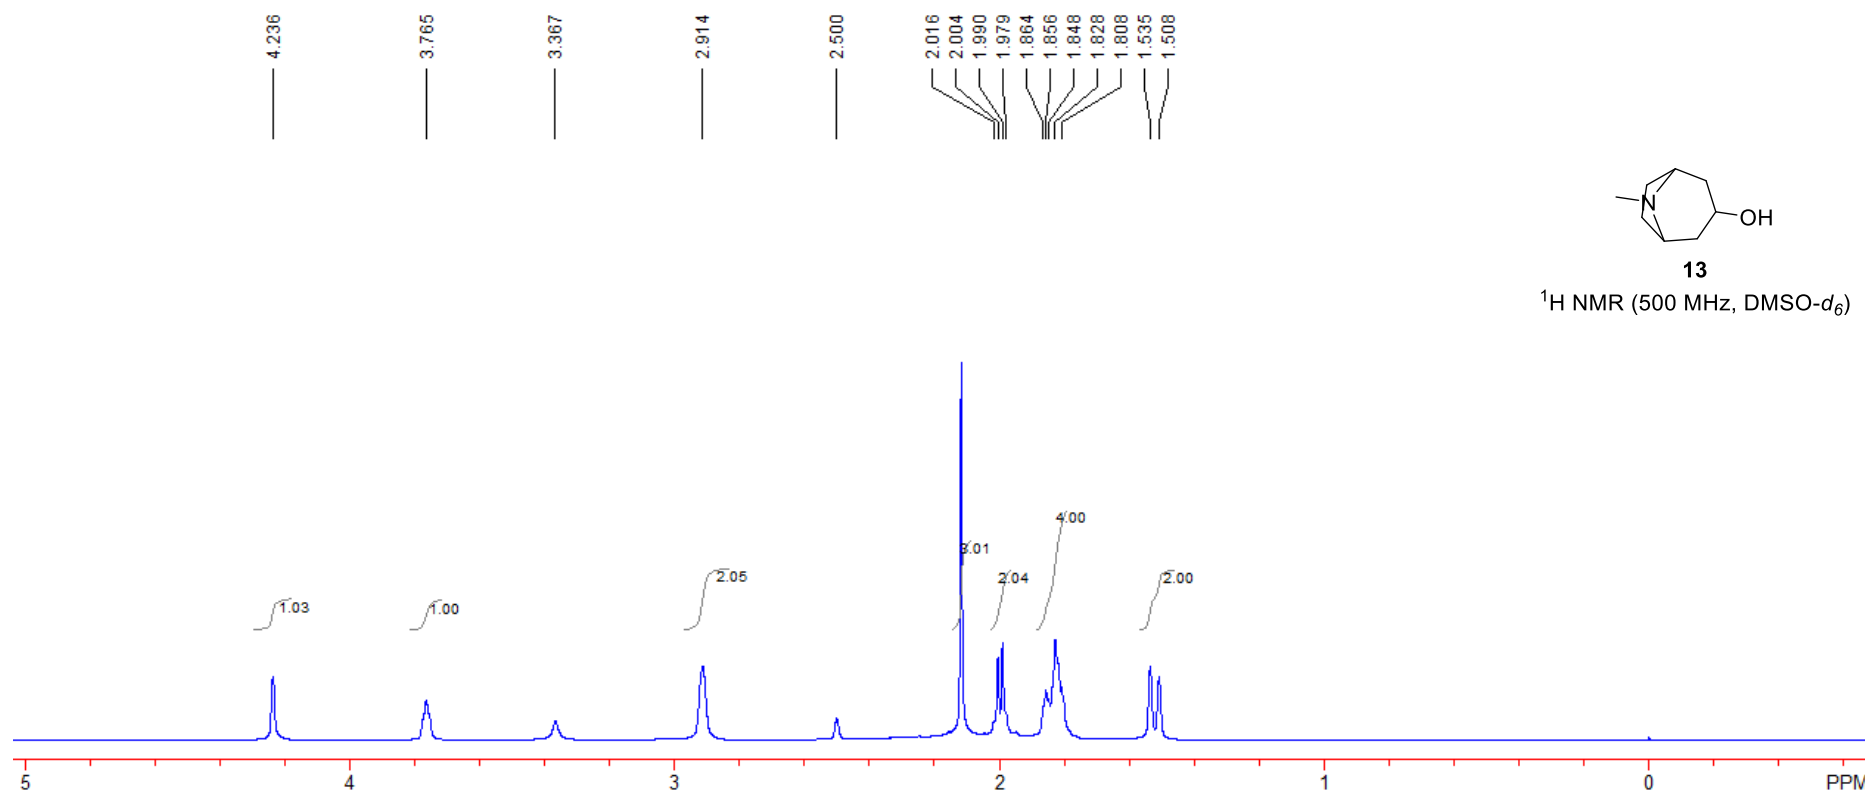

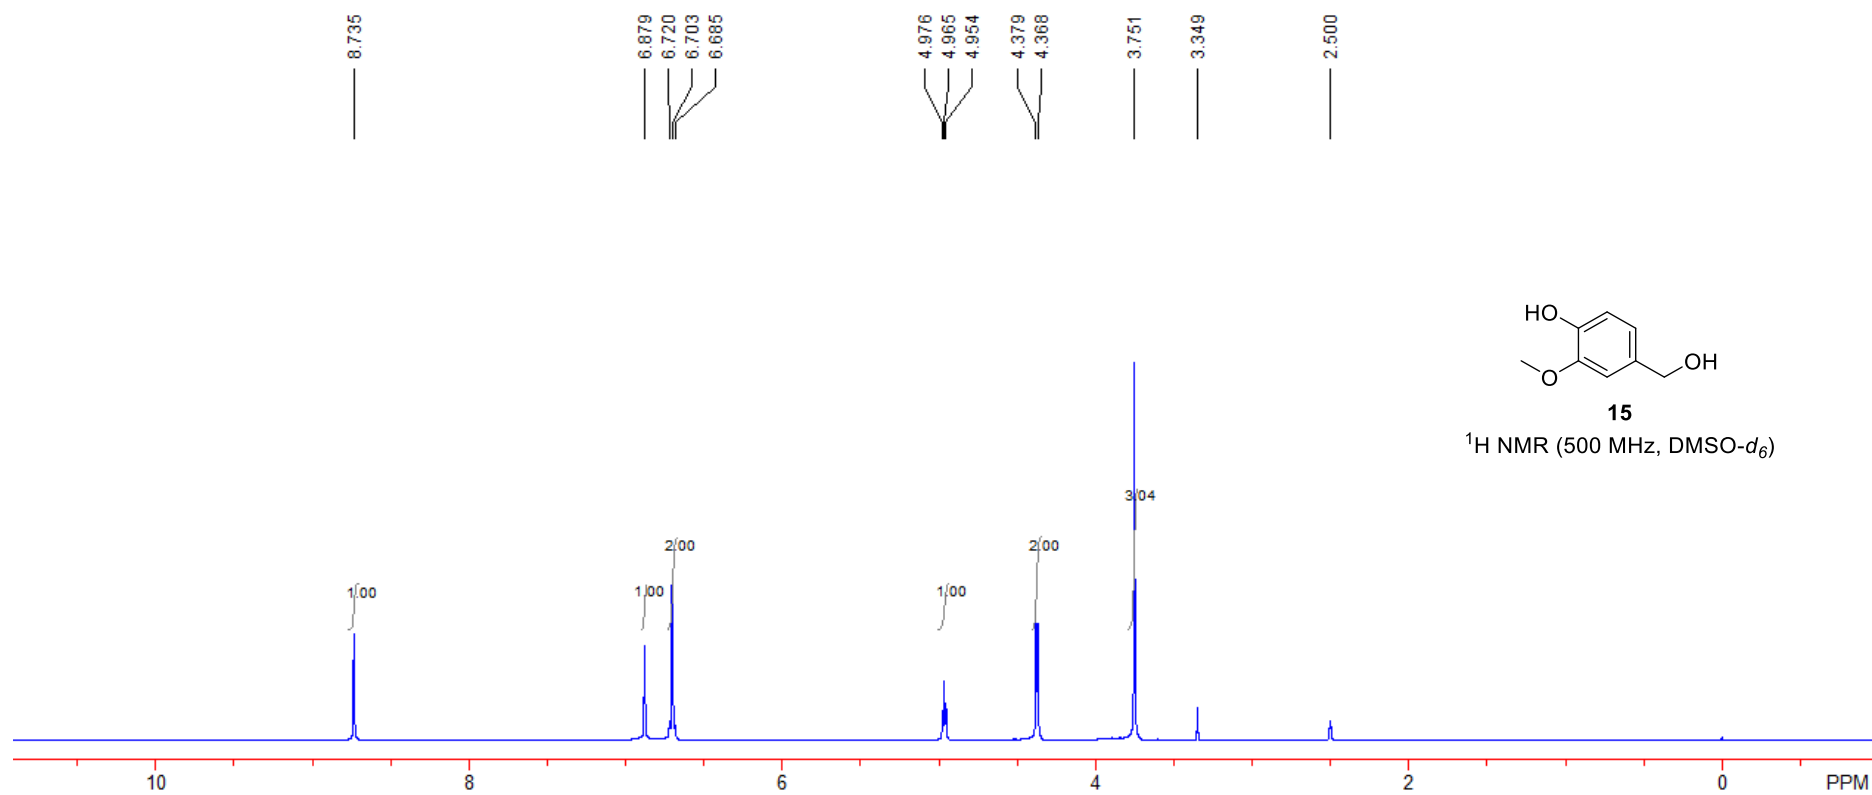

Supplement: d4ob00798k1.pdf [file d4ob00798k1.pdf]
